# Supplementary material
Source: HighWire-hosted journal article supplement (http://dmd.aspetjournals.org/highwire/filestream/80900/field_highwire_adjunct_files/0/1171_supp_data.pdf)
Supplement: 1171_supp_data.pdf [file 1171_supp_data.pdf]

DMD-AR-2022-001171

## Supplemental Data

### Journal Title

Drug Metabolism and Disposition

### Article Title

Three-dimensional spherical cellular aggregates of RPTEC as an in vitro tool for evaluation of human renal proximal tubular toxicity and drug disposition

### Authors

Naoki Ishiguro<sup>1‡\*</sup>, Etsushi Takahashi<sup>2‡</sup>, Hiroshi Arakawa<sup>3</sup>, Asami Saito<sup>1</sup>, Fumihiko Kitagawa<sup>2</sup>, Masayuki Kondo<sup>2</sup>, Gaku Morinaga<sup>1</sup>, Masahito Takatani<sup>1</sup>, Ryo Takahashi<sup>1</sup>, Takashi Kudo<sup>1</sup>, Shin-Ichi Mae<sup>4</sup>, Moeno Kadoguchi<sup>3</sup>, Daichi Deguchi<sup>3</sup>, Yuya Nakazono<sup>3</sup>, Ikumi Tamai<sup>3</sup>, Kenji Osafune<sup>4</sup>, Yoichi Jimbo<sup>2\*</sup>

1: Pharmacokinetics and Non-Clinical Safety Department, Nippon Boehringer Ingelheim Co., Ltd., Kobe, Japan

2: R&D Department, Industrial Division, Nikkiso Co., Ltd., Kanazawa, Japan

3: Faculty of Pharmaceutical Sciences, Institute of Medical, Pharmaceutical and Health Sciences, Kanazawa University; Kanazawa, Japan

4: Center for iPS Cell Research and Application (CiRA), Kyoto University, Kyoto, Japan

‡Co-first authors: Naoki Ishiguro and Etsushi Takahashi

\*Co-corresponding authors: Naoki Ishiguro and Yoichi Jimbo

## Supplemental data

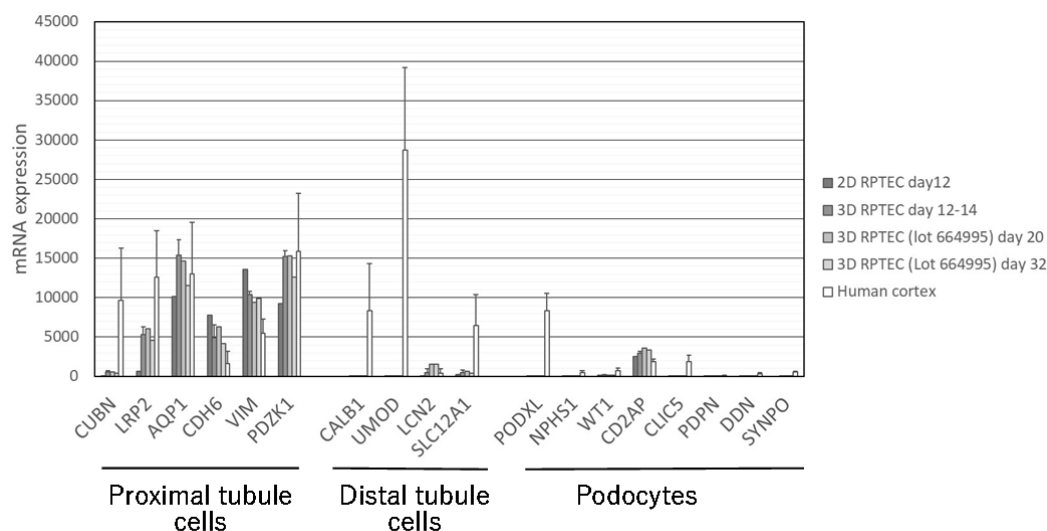

**Supplemental Figure 1:** mRNA expression of kidney marker genes in 2D RPTECs, 3D RPTEC spheroids, and human kidney cortices.

RPTECs (Lot: 664995) were used for 2D RPTECs and 3D RPTEC spheroids at different culture periods. RPTECs (Lot: 18TL117405 and Lot: 682573) were used only for the culture period for 12-14 days. Bar represents mean  $\pm$  SD of 3 and 5 different donors for RPTEC and human kidney cortices, respectively. \*: Statistically significant compared to the control,  $p < 0.05$ ,  $t$ -test

CUBN, cubilin; LRP2, LDL receptor related protein 2; AQP1, aquaporin 1; CDH6, cadherin 6; VIM, Vimentin; PDZK1, PDZ domain containing 1; CALB1, calbindin 1; UMOD, uromodulin; LCN2, lipocalin 2; PODXL, podocalyxin-like; NPHS1, nephrosis 1; WT1, Wilms tumor 1; CD2AP, CD2-associated protein; CLIC5, chloride intracellular channel 5; PDPN, podoplanin; DDN, dendrin; SYNPO, synaptopodin were used as markers for proximal tubule cells, distal tubule cells and podocytes (Agarwal et al., 2021)

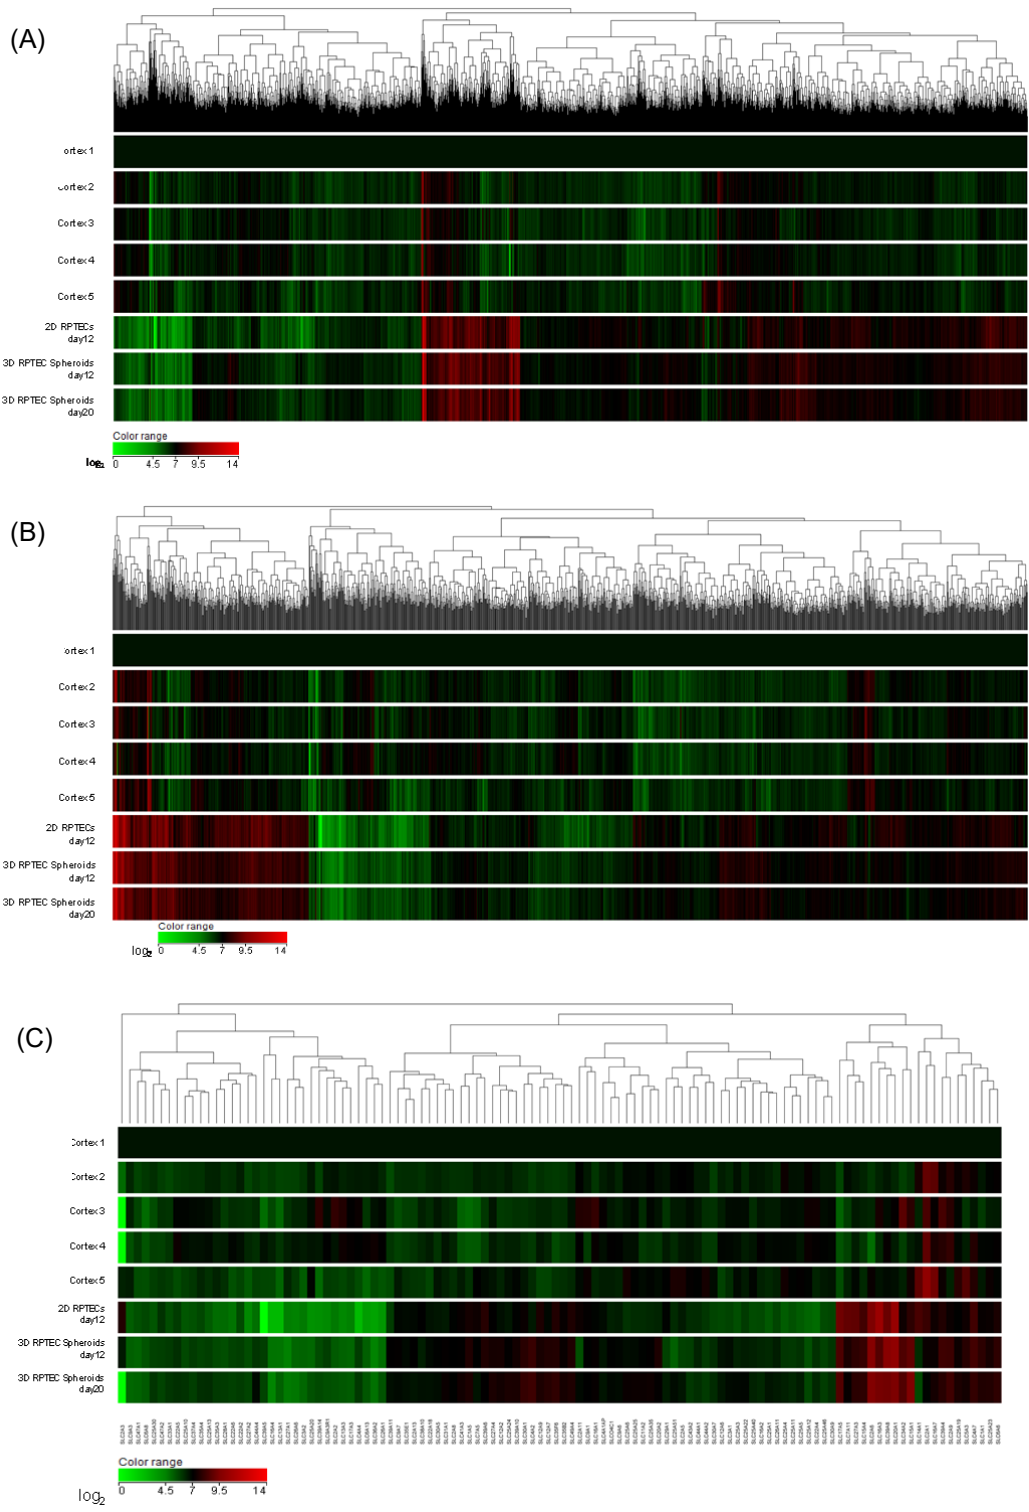

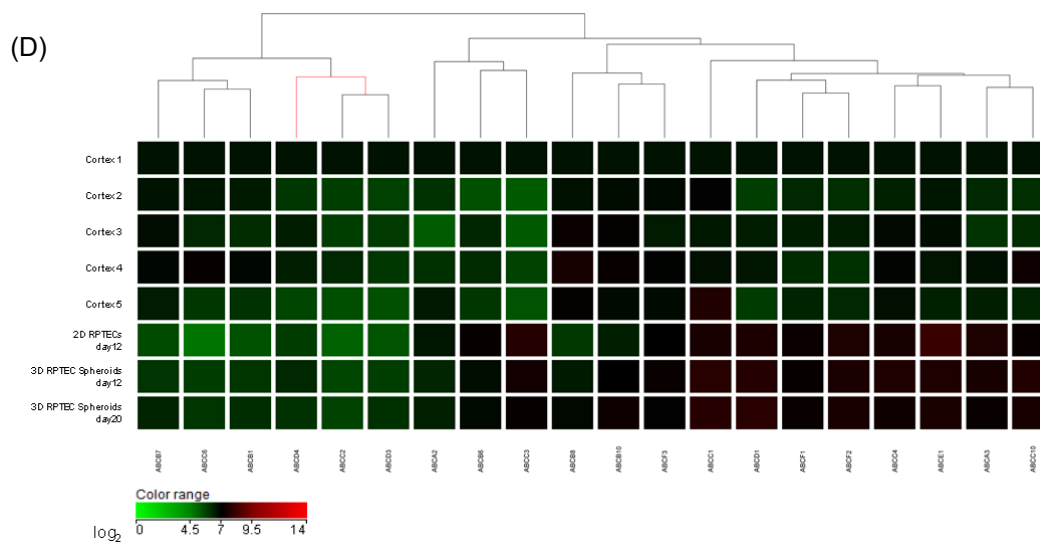

**Supplemental Figure 2:** Heatmap of 4473 proteins (A), 1492 enzymes (B), 112 SLC transporters (C), and 20 ABC transporters in 2D RPTECs at day12, 3D RPTEC spheroids at day 12/20 and human cortices.

Proteins with >20% of the average protein expression in human cortices were used in the heatmap.

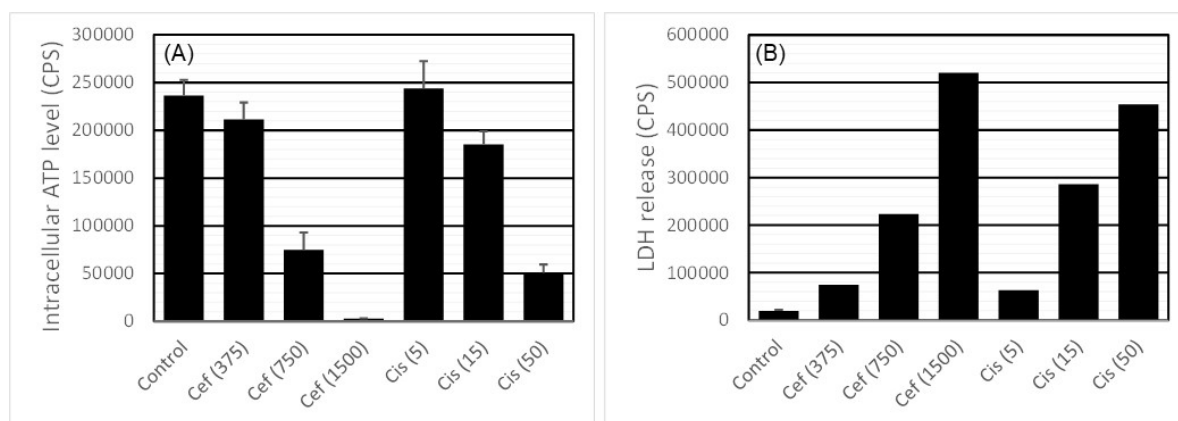

**Supplemental Figure 3:** Effect of cefalotin and cisplatin on intracellular ATP levels (A) and lactate dehydrogenase release (B) in 3D RPTEC spheroids

3D RPTEC spheroids (lot: 664995) were exposed with cefalotin (375, 750 and 1,500  $\mu$ M) and cisplatin (5, 15, 50  $\mu$ M) for 3 days. Bar represents the mean  $\pm$  SD of 4 (A) and

2-3 (B) replications.

## Supplemental data

**Supplemental Table 1:** MS condition and ion monitoring parameters of analytes

| Compound          | Metformin | Hesperetin |          | Furosemide | Digoxin  |
|-------------------|-----------|------------|----------|------------|----------|
| Ionization        | Positive  | Positive   | Negative | Negative   | Negative |
| Q1 ( <i>m/z</i> ) | 130.1     | 303.4      | 301.4    | 329.0      | 825.3    |
| Q3 ( <i>m/z</i> ) | 60.1      | 153.1      | 150.8    | 204.9      | 779.4    |
| Time (msec)       | 30        | 30         | 30       | 30         | 30       |
| DP (V)            | 60        | 160        | -55      | -70        | -180     |
| CE (V)            | 17        | 40         | -32      | -30        | -30      |
| CXP (V)           | 13        | 13         | -13      | -11        | -15      |

### Supplemental Table 2: Proteins showing more similar expression to human kidney cortex by changing 2D culture to 3D spheroidal culture

|                 |                                                                                                                           | Enzymes                                                                                                                   | Transporters                                             | Others                                                                                                                                                                                                                                 |
|-----------------|---------------------------------------------------------------------------------------------------------------------------|---------------------------------------------------------------------------------------------------------------------------|----------------------------------------------------------|----------------------------------------------------------------------------------------------------------------------------------------------------------------------------------------------------------------------------------------|
| Down-regulation | 2D: >5-fold that of human kidney cortex<br>3D: within 5-fold difference to human kidney cortex                            | 42                                                                                                                        | 2                                                        | 27                                                                                                                                                                                                                                     |
|                 | 2D: >5-fold that of human kidney cortex<br>3D: within 5-fold difference to human kidney cortex<br>3D/2D: >3-fold change   | 4 (PLOD2, P3H3, PFKP, ENO2)                                                                                               | 1 (SLC16A3)                                              | 1 (VCAN)                                                                                                                                                                                                                               |
| Up-regulation   | 2D: <0.2-fold that of human kidney cortex<br>3D: within 5-fold difference to human kidney cortex                          | 46                                                                                                                        | 16                                                       | 70                                                                                                                                                                                                                                     |
|                 | 2D: <0.2-fold that of human kidney cortex<br>3D: within 5-fold difference to human kidney cortex<br>3D/2D: >3-fold change | 16 (AKR7A3, ALDH2, LDHD, OGDHL, DIO1, IFI30, NAT8, ZDHHC20, HERC5, GLYCTK, C11orf54, NAPEPLD, GALM, MCEE, ACSM2A, NDUFS8) | 6 (SLC9A3R1, SLC16A4, SLC39A5, SLC6A13, SLC13A1, SLC4A4) | 32 (ATP5PD, SEPTIN4, RAB11FIP3, PIGR, HLA-DRB1, LGALS2, H1-4, MT1G, CEACAM1, CD46, H1-2, COX5A, GCSH, MYL6, LRP2, PTH1R, C1QBP, OCLN, RHBDD2, EMB, PARM1, GLRX5, CPNE8, H1FX, PHYHIPL, CALML4, TXN2, SH3GL2, PXMP2, NFU1, NENF, CNPY2) |

### Supplemental Table 3: Proteins showing more deviated expression from human kidney cortex by changing 2D culture to 3D spheroidal culture

|                 |                                                                                                                           | Enzymes   | Transporters | Others                                                                                         |
|-----------------|---------------------------------------------------------------------------------------------------------------------------|-----------|--------------|------------------------------------------------------------------------------------------------|
| Down-regulation | 2D: within 5-fold that of human kidney cortex<br>3D: <0.2-fold difference to human kidney cortex                          | 11        | 0            | 15                                                                                             |
|                 | 2D: within 5-fold that of human kidney cortex<br>3D: <0.2-fold difference to human kidney cortex<br>3D/2D: >3-fold change | 1 (ADSS1) | -            | 4 (GLTPD2, IRF3, TGFBI, PLIN2)                                                                 |
| Up-regulation   | 2D: within 5-fold that of human kidney cortex<br>3D: >5 fold difference to human kidney cortex                            | 12        | 3            | 44                                                                                             |
|                 | 2D: within 5-fold that of human kidney cortex<br>3D: >5-fold difference to human kidney cortex<br>3D/2D: >3-fold change   | 1 (VNN1)  | -            | 12 (SPINT2, BAG3, HLA-H, S100A1, HLA-F, SQSTM1, CTTN, TPD52L1, TMEM97, PBXIP1, ARFGAP3, ITM2B) |

**Supplemental Table 4:** Coefficient of variation of mRNA expression in 3D RPTEC spheroids from 3 different donors and human kidney cortex from 5 different donors

|                  | Total genes | 3D RPTEC spheroids |            |                      |            |             |            | Human kidney cortex |            |                      |            |             |            |
|------------------|-------------|--------------------|------------|----------------------|------------|-------------|------------|---------------------|------------|----------------------|------------|-------------|------------|
|                  |             | CV% $\leq$ 20%     |            | 20% < CV% $\leq$ 50% |            | 50% < CV%   |            | CV% $\leq$ 20%      |            | 20% < CV% $\leq$ 50% |            | 50% < CV%   |            |
|                  |             | No. of gene        | % of total | No. of gene          | % of total | No. of gene | % of total | No. of gene         | % of total | No. of gene          | % of total | No. of gene | % of total |
| All genes        | 16985       | 10198              | 60.0       | 4620                 | 27.2       | 2167        | 12.8       | 4865                | 28.6       | 7859                 | 46.3       | 4261        | 25.1       |
| Enzymes          | 3193        | 2257               | 70.7       | 691                  | 21.6       | 245         | 7.67       | 1069                | 33.5       | 1498                 | 46.9       | 626         | 19.61      |
| SLC transporters | 334         | 180                | 53.9       | 111                  | 33.2       | 43          | 12.9       | 46                  | 13.8       | 158                  | 47.3       | 130         | 38.9       |
| ABC transporters | 39          | 16                 | 41.0       | 18                   | 46.2       | 5           | 12.8       | 6                   | 15.4       | 25                   | 64.1       | 8           | 20.5       |

RPTECs were cultured for 12 or 14 days in spheroid culture.

### Supplemental table 5: Protein abundance in total lysate, plasma membrane and PM/TL ratio of detected proteins

| Protein name | 3D RP/TEC Spheroid_L.ct.664995_day12_TL |        |       | 3D RP/TEC Spheroid_L.ct.664995_day12_PM |       |       | PM/TL ratio |         |       | Protein name | 3D RP/TEC Spheroid_L.ct.664995_day12_TL |          |       | 3D RP/TEC Spheroid_L.ct.664995_day12_PM |       |  | PM/TL ratio |  |  | Protein name | 3D RP/TEC Spheroid_L.ct.664995_day12_TL |  |  | 3D RP/TEC Spheroid_L.ct.664995_day12_PM |  |  | PM/TL ratio |  |  |
|--------------|-----------------------------------------|--------|-------|-----------------------------------------|-------|-------|-------------|---------|-------|--------------|-----------------------------------------|----------|-------|-----------------------------------------|-------|--|-------------|--|--|--------------|-----------------------------------------|--|--|-----------------------------------------|--|--|-------------|--|--|
| ZZEF1        | 94.2                                    | 63.5   | 0.67  | YBX3                                    | 958.3 | 472.3 | 0.49        | WDR18   | 187.9 | 114.2        | 0.61                                    | VNN1     | 134.6 | 794.2                                   | 5.90  |  |             |  |  |              |                                         |  |  |                                         |  |  |             |  |  |
| ZYX          | 123.4                                   | 54.5   | 0.44  | YBX1                                    | 287.7 | 235.2 | 0.82        | WDR12   | 196.6 | 157.1        | 0.80                                    | VKORC1L1 | 113.9 | 322.9                                   | 2.83  |  |             |  |  |              |                                         |  |  |                                         |  |  |             |  |  |
| ZW10         | 123.9                                   | 131.5  | 1.06  | YARS2                                   | 173.3 | 16    | 0.09        | WDR11   | 89.8  | 69.1         | 0.77                                    | VKORC1   | 64    | 242.2                                   | 3.78  |  |             |  |  |              |                                         |  |  |                                         |  |  |             |  |  |
| ZSWIM8       | 155.7                                   | 162.5  | 1.04  | YARS1                                   | 449.5 | 93.6  | 0.21        | WDR1    | 190   | 57.7         | 0.30                                    | VIPAS39  | 159   | 55.2                                    | 0.35  |  |             |  |  |              |                                         |  |  |                                         |  |  |             |  |  |
| ZRANB2       | 446.1                                   | 22.8   | 0.05  | XYLB                                    | 35.6  | 10.4  | 0.29        | WDFY1   | 126.9 | 311          | 2.45                                    | VIM      | 235.4 | 69.2                                    | 0.29  |  |             |  |  |              |                                         |  |  |                                         |  |  |             |  |  |
| ZPR1         | 158.9                                   | 94.6   | 0.60  | XXYL1                                   | 60.3  | 183.1 | 3.04        | WBP2    | 212   | 466.6        | 2.20                                    | VIL1     | 12.4  | 14.3                                    | 1.15  |  |             |  |  |              |                                         |  |  |                                         |  |  |             |  |  |
| ZNF638       | 163.9                                   | 78.5   | 0.48  | XRN2                                    | 110.7 | 55.7  | 0.50        | WBP11   | 794.3 | 46.1         | 0.06                                    | VEZT     | 171.1 | 591.3                                   | 3.46  |  |             |  |  |              |                                         |  |  |                                         |  |  |             |  |  |
| ZNF622       | 290.9                                   | 53     | 0.18  | XRCC6                                   | 145.2 | 27.2  | 0.19        | WASL    | 246   | 104.4        | 0.42                                    | VDAC3    | 125   | 512                                     | 4.10  |  |             |  |  |              |                                         |  |  |                                         |  |  |             |  |  |
| ZNF532       | 106.6                                   | 79     | 0.74  | XRCC5                                   | 134.5 | 46.5  | 0.35        | WASHC5  | 119.6 | 101.8        | 0.85                                    | VDAC2    | 128.3 | 542.8                                   | 4.23  |  |             |  |  |              |                                         |  |  |                                         |  |  |             |  |  |
| ZNF512       | 93.2                                    | 74.2   | 0.80  | XRCC1                                   | 175.8 | 30.9  | 0.18        | WASHC4  | 120.1 | 98.6         | 0.82                                    | VDAC1    | 119.7 | 462.5                                   | 3.86  |  |             |  |  |              |                                         |  |  |                                         |  |  |             |  |  |
| ZNF451       | 123.4                                   | 78.1   | 0.63  | XPOT                                    | 194.7 | 89.2  | 0.46        | WASHC3  | 112.6 | 74.5         | 0.66                                    | VCPIP1   | 131   | 68.2                                    | 0.52  |  |             |  |  |              |                                         |  |  |                                         |  |  |             |  |  |
| ZNF330       | 183.4                                   | 50     | 0.27  | XPO7                                    | 82.6  | 31.9  | 0.39        | WASHC2A | 192.8 | 96.2         | 0.50                                    | VCP      | 146.3 | 47.8                                    | 0.33  |  |             |  |  |              |                                         |  |  |                                         |  |  |             |  |  |
| ZNF326       | 133.9                                   | 150.6  | 1.12  | XPO5                                    | 235.4 | 176.7 | 0.75        | WASH2P  | 150.6 | 86.8         | 0.58                                    | VCL      | 90.6  | 30.3                                    | 0.33  |  |             |  |  |              |                                         |  |  |                                         |  |  |             |  |  |
| ZNF207       | 133.8                                   | 16.8   | 0.13  | XPO4                                    | 137.2 | 82.6  | 0.60        | WASF2   | 142.7 | 159          | 1.11                                    | VCAN     | 302.5 | 86.9                                    | 0.29  |  |             |  |  |              |                                         |  |  |                                         |  |  |             |  |  |
| ZMYND8       | 249.4                                   | 92.6   | 0.37  | XPO1                                    | 119.7 | 102.4 | 0.86        | WARS2   | 88.2  | 29.1         | 0.33                                    | VCAM1    | 292.3 | 1132.8                                  | 3.88  |  |             |  |  |              |                                         |  |  |                                         |  |  |             |  |  |
| ZMYM4        | 137                                     | 137.2  | 1.00  | XPNPEP3                                 | 109.4 | 11.5  | 0.11        | WARS1   | 174.5 | 35.3         | 0.20                                    | VBP1     | 202.5 | 38.3                                    | 0.19  |  |             |  |  |              |                                         |  |  |                                         |  |  |             |  |  |
| ZMYM2        | 164.6                                   | 84.6   | 0.51  | XPNPEP2                                 | 28.9  | 90.2  | 3.12        | VWA8    | 85.7  | 47.9         | 0.56                                    | VAV2     | 91.2  | 65.9                                    | 0.72  |  |             |  |  |              |                                         |  |  |                                         |  |  |             |  |  |
| ZMPSTE24     | 108.7                                   | 529.6  | 4.87  | XPNPEP1                                 | 185.6 | 52.7  | 0.28        | VWA5A   | 251   | 85.7         | 0.34                                    | VAT1L    | 0.1   | 1.9                                     | 19.00 |  |             |  |  |              |                                         |  |  |                                         |  |  |             |  |  |
| ZFYVE26      | 155                                     | 353.2  | 2.28  | XPC                                     | 72.8  | 41.3  | 0.57        | VWA1    | 2.5   | 3.5          | 1.40                                    | VAT1     | 166.8 | 224.8                                   | 1.35  |  |             |  |  |              |                                         |  |  |                                         |  |  |             |  |  |
| ZFYVE1       | 84.9                                    | 136.6  | 1.61  | XAB2                                    | 129.2 | 93.3  | 0.72        | VTN     | 2     | 2.2          | 1.10                                    | VASP     | 231.1 | 123.2                                   | 0.53  |  |             |  |  |              |                                         |  |  |                                         |  |  |             |  |  |
| ZFR          | 223.7                                   | 66.8   | 0.30  | WVVOX                                   | 106.1 | 221.4 | 2.09        | VTIB    | 141.3 | 995.4        | 7.04                                    | VARS1    | 235.1 | 89.9                                    | 0.38  |  |             |  |  |              |                                         |  |  |                                         |  |  |             |  |  |
| ZFPL1        | 127.1                                   | 364.5  | 2.87  | WRNIP1                                  | 105.1 | 67.8  | 0.65        | VTIA    | 116.5 | 491.4        | 4.22                                    | VAPB     | 128.1 | 492.9                                   | 3.85  |  |             |  |  |              |                                         |  |  |                                         |  |  |             |  |  |
| ZDHHC5       | 280.8                                   | 1636.3 | 5.83  | WNK1                                    | 300.8 | 163.3 | 0.54        | VTA1    | 131.5 | 212.4        | 1.62                                    | VAPA     | 136.2 | 529.3                                   | 3.89  |  |             |  |  |              |                                         |  |  |                                         |  |  |             |  |  |
| ZDHHC3       | 146.4                                   | 393.4  | 2.69  | WLS                                     | 51.2  | 388   | 7.58        | VSNL1   | 64.7  | 100.6        | 1.55                                    | VANGL1   | 63.3  | 524.3                                   | 8.28  |  |             |  |  |              |                                         |  |  |                                         |  |  |             |  |  |
| ZDHHC20      | 56.9                                    | 781.1  | 13.73 | WIFI2                                   | 250.4 | 179.8 | 0.72        | VRK2    | 208.4 | 474.1        | 2.27                                    | VAMP8    | 160   | 1461.4                                  | 9.13  |  |             |  |  |              |                                         |  |  |                                         |  |  |             |  |  |
| ZC3HAV1      | 94.9                                    | 103.1  | 1.09  | WFS1                                    | 41.8  | 134.7 | 3.22        | VPS53   | 135.8 | 130.9        | 0.96                                    | VAMP7    | 160.3 | 1254.9                                  | 7.83  |  |             |  |  |              |                                         |  |  |                                         |  |  |             |  |  |
| ZC3H18       | 189.9                                   | 35.1   | 0.18  | WDR92                                   | 186.5 | 81.3  | 0.44        | VPS52   | 138.3 | 138.6        | 1.00                                    | VAMP3    | 123.4 | 539.4                                   | 4.37  |  |             |  |  |              |                                         |  |  |                                         |  |  |             |  |  |
| ZC3H15       | 131.9                                   | 19.7   | 0.15  | WDR91                                   | 154.8 | 261.5 | 1.69        | VPS51   | 199.5 | 229.8        | 1.15                                    | VAC14    | 128.7 | 101.2                                   | 0.79  |  |             |  |  |              |                                         |  |  |                                         |  |  |             |  |  |
| ZC3H14       | 564.7                                   | 494.4  | 0.88  | WDR82                                   | 124.2 | 39.9  | 0.32        | VPS50   | 119.7 | 115.6        | 0.97                                    | UXS1     | 216.7 | 662.7                                   | 3.06  |  |             |  |  |              |                                         |  |  |                                         |  |  |             |  |  |
| ZBTB20       | 111.6                                   | 76.6   | 0.69  | WDR81                                   | 125.5 | 273.7 | 2.18        | VPS4B   | 125.9 | 174.4        | 1.39                                    | UTRN     | 140.7 | 282                                     | 2.00  |  |             |  |  |              |                                         |  |  |                                         |  |  |             |  |  |
| ZADH2        | 71.6                                    | 17.8   | 0.25  | WDR77                                   | 127.4 | 44.5  | 0.35        | VPS4A   | 126.8 | 207.3        | 1.63                                    | UTP6     | 166.3 | 294.6                                   | 1.77  |  |             |  |  |              |                                         |  |  |                                         |  |  |             |  |  |
| YY1          | 123.5                                   | 45.4   | 0.37  | WDR75                                   | 162.8 | 222.8 | 1.37        | VPS45   | 89.7  | 300.6        | 3.35                                    | UTP3     | 84.8  | 92.9                                    | 1.10  |  |             |  |  |              |                                         |  |  |                                         |  |  |             |  |  |
| YWHAZ        | 236.1                                   | 67     | 0.28  | WDR72                                   | 104.2 | 530.8 | 5.09        | VPS41   | 136.5 | 190.6        | 1.40                                    | UTP20    | 155.4 | 91.9                                    | 0.59  |  |             |  |  |              |                                         |  |  |                                         |  |  |             |  |  |
| YWHAQ        | 310.6                                   | 73.9   | 0.24  | WDR7                                    | 178.2 | 177   | 0.99        | VPS39   | 150.4 | 230.8        | 1.53                                    | UTP18    | 156.7 | 202                                     | 1.29  |  |             |  |  |              |                                         |  |  |                                         |  |  |             |  |  |
| YWHAH        | 193.1                                   | 76.8   | 0.40  | WDR61                                   | 142   | 42.3  | 0.30        | VPS37B  | 151.9 | 365.6        | 2.41                                    | UTP15    | 110.1 | 183.8                                   | 1.67  |  |             |  |  |              |                                         |  |  |                                         |  |  |             |  |  |
| YWHAJ        | 189.7                                   | 61.9   | 0.33  | WDR6                                    | 173.3 | 91    | 0.53        | VPS36   | 134.3 | 53.3         | 0.40                                    | UTP11    | 183   | 141.3                                   | 0.77  |  |             |  |  |              |                                         |  |  |                                         |  |  |             |  |  |
| YWHAE        | 177.7                                   | 63.9   | 0.36  | WDR59                                   | 109.7 | 142.1 | 1.30        | VPS35L  | 108.6 | 128.6        | 1.18                                    | USP9X    | 122.5 | 74.7                                    | 0.61  |  |             |  |  |              |                                         |  |  |                                         |  |  |             |  |  |
| YWHA8        | 156.4                                   | 50     | 0.32  | WDR55                                   | 192.4 | 80.5  | 0.42        | VPS35   | 131.2 | 59.3         | 0.45                                    | USP8     | 174   | 322.7                                   | 1.85  |  |             |  |  |              |                                         |  |  |                                         |  |  |             |  |  |
| YTHDF3       | 246.9                                   | 71.8   | 0.29  | WDR5                                    | 121.8 | 15.6  | 0.13        | VPS33B  | 154.3 | 46.5         | 0.30                                    | VAP7     | 112.7 | 48                                      | 0.43  |  |             |  |  |              |                                         |  |  |                                         |  |  |             |  |  |
| YTHDC2       | 162.5                                   | 62.6   | 0.39  | WDR48                                   | 131.1 | 237.1 | 1.81        | VPS33A  | 162.1 | 123.4        | 0.76                                    | USP5     | 150.3 | 46.9                                    | 0.31  |  |             |  |  |              |                                         |  |  |                                         |  |  |             |  |  |
| YME1L1       | 127.6                                   | 351.4  | 2.75  | WDR47                                   | 183.5 | 163.5 | 0.89        | VPS29   | 164.6 | 76.4         | 0.46                                    | USP48    | 116.6 | 77.3                                    | 0.66  |  |             |  |  |              |                                         |  |  |                                         |  |  |             |  |  |
| YLP1M1       | 263.6                                   | 7.7    | 0.03  | WDR45B                                  | 174.8 | 189.9 | 1.09        | VPS26B  | 124.8 | 68.9         | 0.55                                    | USP47    | 145.7 | 68                                      | 0.47  |  |             |  |  |              |                                         |  |  |                                         |  |  |             |  |  |
| YKT6         | 147.8                                   | 163    | 1.10  | WDR45                                   | 159.4 | 97.5  | 0.61        | VPS26A  | 153.7 | 79.4         | 0.52                                    | USP40    | 95.4  | 260.1                                   | 2.73  |  |             |  |  |              |                                         |  |  |                                         |  |  |             |  |  |
| YIPF6        | 66.4                                    | 242.1  | 3.65  | WDR44                                   | 523.1 | 246.2 | 0.47        | VPS25   | 155.2 | 87.6         | 0.56                                    | USP4     | 135.4 | 36                                      | 0.27  |  |             |  |  |              |                                         |  |  |                                         |  |  |             |  |  |
| YIPF5        | 104.1                                   | 443.3  | 4.26  | WDR43                                   | 197.4 | 314.3 | 1.59        | VPS18   | 159.1 | 99.8         | 0.63                                    | USP39    | 118.9 | 58.8                                    | 0.49  |  |             |  |  |              |                                         |  |  |                                         |  |  |             |  |  |
| YIPF4        | 110.2                                   | 337.4  | 3.06  | WDR37                                   | 159.1 | 94.4  | 0.59        | VPS16   | 164.4 | 134.2        | 0.82                                    | USP24    | 144.5 | 111.5                                   | 0.77  |  |             |  |  |              |                                         |  |  |                                         |  |  |             |  |  |
| YIPF3        | 119.7                                   | 371.5  | 3.10  | WDR36                                   | 205.7 | 118.5 | 0.58        | VPS13D  | 144.3 | 136          | 0.94                                    | USP19    | 161.2 | 133.6                                   | 0.83  |  |             |  |  |              |                                         |  |  |                                         |  |  |             |  |  |
| YIPF1        | 145.9                                   | 644.5  | 4.42  | WDR33                                   | 509.7 | 102.3 | 0.20        | VPS13C  | 174.8 | 391.3        | 2.24                                    | USP15    | 170.5 | 69.4                                    | 0.41  |  |             |  |  |              |                                         |  |  |                                         |  |  |             |  |  |
| YES1         | 95.6                                    | 450.5  | 4.72  | WDR3                                    | 163.6 | 168.5 | 1.03        | VPS13A  | 101.2 | 186.5        | 1.84                                    | USP14    | 264   | 54.1                                    | 0.20  |  |             |  |  |              |                                         |  |  |                                         |  |  |             |  |  |
|              |                                         |        |       | WDR19                                   | 180.3 | 126.2 | 0.70        | VPS11   | 157.1 | 136.5        | 0.87                                    | USP13    | 132.5 | 79.7                                    | 0.60  |  |             |  |  |              |                                         |  |  |                                         |  |  |             |  |  |

Values are expressed as % of protein abundance in TL of human kidney cortex 1.



**Supplemental table 5 (Continued):**

| Protein name | 3D RPTEC Spheroid_Lot.664995_day12_TL | 3D RPTEC Spheroid_Lot.664995_day12_PM | PM/TL ratio | Protein name | 3D RPTEC Spheroid_Lot.664995_day12_TL | 3D RPTEC Spheroid_Lot.664995_day12_PM | PM/TL ratio | Protein name | 3D RPTEC Spheroid_Lot.664995_day12_TL | 3D RPTEC Spheroid_Lot.664995_day12_PM | PM/TL ratio | Protein name | 3D RPTEC Spheroid_Lot.664995_day12_TL | 3D RPTEC Spheroid_Lot.664995_day12_PM | PM/TL ratio |
|--------------|---------------------------------------|---------------------------------------|-------------|--------------|---------------------------------------|---------------------------------------|-------------|--------------|---------------------------------------|---------------------------------------|-------------|--------------|---------------------------------------|---------------------------------------|-------------|
| USP10        | 218.6                                 | 57.8                                  | 0.26        | UBR3         | 117.2                                 | 32.6                                  | 0.28        | TXNDC12      | 209.5                                 | 172.9                                 | 0.83        | TRNT1        | 263.6                                 | 35.4                                  | 0.13        |
| USO1         | 120.6                                 | 89.8                                  | 0.74        | UBR2         | 135.4                                 | 133.7                                 | 0.99        | TXN2         | 111.7                                 | 9.9                                   | 0.09        | TRMU         | 71.2                                  | 24                                    | 0.34        |
| USH1C        | 53                                    | 38.9                                  | 0.73        | UBR1         | 100.1                                 | 13.2                                  | 0.13        | TXLNA        | 180                                   | 41.9                                  | 0.23        | TRMT2A       | 131.3                                 | 88.8                                  | 0.68        |
| USE1         | 109.2                                 | 346.7                                 | 3.17        | UBQLN2       | 138.8                                 | 57.9                                  | 0.42        | TWF2         | 242.2                                 | 80                                    | 0.33        | TRMT1L       | 166.8                                 | 40.6                                  | 0.24        |
| UROD         | 269.3                                 | 102.2                                 | 0.38        | UBQLN1       | 110.9                                 | 32.6                                  | 0.29        | TWF1         | 172.8                                 | 63.3                                  | 0.37        | TRMT10C      | 161.2                                 | 20.6                                  | 0.13        |
| UQCRQ        | 41.1                                  | 218.6                                 | 5.32        | UBP1         | 131.5                                 | 84.7                                  | 0.64        | TVP23B       | 162.3                                 | 217.3                                 | 1.34        | TRMT1        | 1210.8                                | 281                                   | 0.23        |
| UQCRH        | 36.6                                  | 123.8                                 | 3.38        | UBLCP1       | 221.4                                 | 18.2                                  | 0.08        | TUFM         | 88.1                                  | 6.1                                   | 0.07        | TRIP6        | 88                                    | 42.5                                  | 0.48        |
| UQCRC2       | 57.9                                  | 171.9                                 | 2.97        | UBL3         | 143.4                                 | 1021.1                                | 7.12        | TUBGCP3      | 97.3                                  | 81.6                                  | 0.84        | TRIP12       | 106.9                                 | 84                                    | 0.79        |
| UQCRC1       | 62.1                                  | 169.3                                 | 2.73        | UBL4         | 131                                   | 146.9                                 | 1.12        | TUBGCP2      | 110.4                                 | 71.6                                  | 0.65        | TRIP10       | 146.4                                 | 68.7                                  | 0.47        |
| UQCRB        | 68                                    | 218.5                                 | 3.21        | UBFD1        | 155.8                                 | 36.7                                  | 0.24        | TUBG1        | 109.5                                 | 68.9                                  | 0.63        | TRIOBP       | 87.2                                  | 38.2                                  | 0.44        |
| UQCR11       | 48.6                                  | 162.5                                 | 3.34        | UBE4B        | 200.5                                 | 189.8                                 | 0.95        | TUBB8        | 95.1                                  | 30.6                                  | 0.32        | TRIM47       | 165.9                                 | 265.1                                 | 1.60        |
| UQCR10       | 64.3                                  | 220.7                                 | 3.43        | UBE4A        | 94.5                                  | 77.2                                  | 0.82        | TUBB6        | 237.1                                 | 110.9                                 | 0.47        | TRIM33       | 84.7                                  | 65.4                                  | 0.77        |
| UQCC2        | 145.4                                 | 192.4                                 | 1.32        | UBE3C        | 197.6                                 | 112.7                                 | 0.57        | TUBB4B       | 132.8                                 | 40.4                                  | 0.30        | TRIM3        | 67.4                                  | 37.1                                  | 0.55        |
| UQCC1        | 147.1                                 | 161.2                                 | 1.10        | UBE3A        | 111.2                                 | 21.7                                  | 0.20        | TUBB4A       | 126.3                                 | 52.7                                  | 0.42        | TRIM28       | 224.7                                 | 67.3                                  | 0.30        |
| UPP1         | 338.8                                 | 35.1                                  | 0.10        | UBE2Z        | 237.3                                 | 139.6                                 | 0.59        | TUBB3        | 1909.9                                | 348.5                                 | 0.18        | TRIM25       | 131.9                                 | 47.2                                  | 0.36        |
| UPF2         | 98.3                                  | 57.2                                  | 0.58        | UBE2V2       | 162.7                                 | 49.8                                  | 0.31        | TUBB2B       | 119.7                                 | 59.7                                  | 0.50        | TRIM2        | 53.1                                  | 36.4                                  | 0.69        |
| UPF1         | 111.9                                 | 86.6                                  | 0.77        | UBE2O        | 90.1                                  | 35.4                                  | 0.39        | TUBB2A       | 129.4                                 | 0.1                                   | 0.00        | TREH         | 5.7                                   | 11.3                                  | 1.98        |
| UPB1         | 13.6                                  | 11.4                                  | 0.84        | UBE2N        | 186.4                                 | 131.3                                 | 0.70        | TUBB         | 148.2                                 | 47.7                                  | 0.32        | TRAPPC9      | 77.3                                  | 43.3                                  | 0.56        |
| UNC93B1      | 154.6                                 | 968.4                                 | 6.26        | UBE2M        | 237                                   | 134.3                                 | 0.57        | TUBA4A       | 63.9                                  | 26.7                                  | 0.42        | TRAPPC8      | 141.3                                 | 73.3                                  | 0.52        |
| UNC5CL       | 39.7                                  | 352                                   | 8.87        | UBE2L5       | 289.8                                 | 77.2                                  | 0.27        | TUBA1C       | 136.1                                 | 52.2                                  | 0.38        | TRAPPC6B     | 91.2                                  | 92.7                                  | 1.02        |
| UNC45A       | 183.2                                 | 124.3                                 | 0.68        | UBE2L3       | 317.1                                 | 94                                    | 0.30        | TUBA1A       | 138                                   | 59.2                                  | 0.43        | TRAPPC4      | 113.3                                 | 42.3                                  | 0.37        |
| UNC13B       | 140.9                                 | 143.2                                 | 1.02        | UBE2K        | 308.1                                 | 112                                   | 0.36        | TTYH3        | 221.8                                 | 1314.5                                | 5.93        | TRAPPC3      | 131.4                                 | 39.7                                  | 0.30        |
| UMPS         | 95.1                                  | 62.5                                  | 0.66        | UBE2J2       | 99.2                                  | 239.2                                 | 2.41        | TTR          | 6.3                                   | 10.4                                  | 1.65        | TRAPPC2L     | 131.5                                 | 36.2                                  | 0.28        |
| UMOD         | 36.2                                  | 13.9                                  | 0.38        | UBE2J1       | 55.9                                  | 183.3                                 | 3.28        | TTLL12       | 348                                   | 101.5                                 | 0.29        | TRAPPC11     | 127.9                                 | 107.8                                 | 0.84        |
| ULK3         | 131.7                                 | 131.3                                 | 1.00        | UBE2H        | 221                                   | 28                                    | 0.13        | TTI1         | 138.7                                 | 166.2                                 | 1.20        | TRAPPC10     | 19.7                                  | 11.6                                  | 0.59        |
| UGT3A1       | 68.8                                  | 254.7                                 | 3.70        | UBE2E2       | 323.8                                 | 154                                   | 0.48        | TTC8         | 82.7                                  | 48.6                                  | 0.59        | TRAP1        | 127                                   | 36.5                                  | 0.29        |
| UGT2B7       | 5.3                                   | 10.2                                  | 1.92        | UBE2D3       | 179.8                                 | 152.2                                 | 0.85        | TTC7B        | 90.9                                  | 471.5                                 | 5.19        | TRAM1        | 194.4                                 | 746                                   | 3.84        |
| UGT2A3       | 42.2                                  | 155.1                                 | 3.68        | UBAP2L       | 549.3                                 | 96.2                                  | 0.18        | TTC39C       | 703.3                                 | 432.1                                 | 0.61        | TRAF6        | 122.8                                 | 80.9                                  | 0.66        |
| UGT1A9       | 39.4                                  | 145.7                                 | 3.70        | UBA7         | 110.2                                 | 47.9                                  | 0.43        | TTC38        | 77.3                                  | 17.3                                  | 0.22        | TRAF2        | 163.1                                 | 282.3                                 | 1.73        |
| UGT1A6       | 65.9                                  | 244.2                                 | 3.71        | UBA6         | 202.1                                 | 48.7                                  | 0.24        | TTC37        | 124.5                                 | 58.5                                  | 0.47        | TRADD        | 71.9                                  | 46.5                                  | 0.65        |
| UGP2         | 131.1                                 | 28.7                                  | 0.22        | UBA5         | 101.5                                 | 44.1                                  | 0.43        | TTC26        | 151.6                                 | 81.9                                  | 0.54        | TRABD        | 149.6                                 | 556.7                                 | 3.72        |
| UGGT2        | 165.5                                 | 345.7                                 | 2.09        | UBA3         | 225.2                                 | 58.4                                  | 0.26        | TTC19        | 187.7                                 | 260.3                                 | 1.39        | TRA2B        | 127.3                                 | 36.9                                  | 0.29        |
| UGGT1        | 110                                   | 148.8                                 | 1.35        | UBA2         | 172.1                                 | 39.6                                  | 0.23        | TTC13        | 115.3                                 | 264.6                                 | 2.29        | TPT1         | 196.6                                 | 31.8                                  | 0.16        |
| UGDH         | 76.9                                  | 15.2                                  | 0.20        | UBA1         | 136.9                                 | 28.4                                  | 0.21        | TSTA3        | 137.8                                 | 23.9                                  | 0.17        | TPST1        | 75.7                                  | 334.6                                 | 4.42        |
| UGCG         | 317                                   | 3322                                  | 10.48       | UAP1L1       | 110.4                                 | 32.7                                  | 0.30        | TST          | 93.5                                  | 3.3                                   | 0.04        | TPRGL1       | 156.9                                 | 256.4                                 | 1.63        |
| UFSP2        | 85.9                                  | 251.6                                 | 2.93        | UAP1         | 157.2                                 | 87.5                                  | 0.56        | TSPAN9       | 83.2                                  | 506.7                                 | 6.09        | TPR          | 112.1                                 | 21.2                                  | 0.19        |
| UFL1         | 84.1                                  | 119.5                                 | 1.42        | UACA         | 100.2                                 | 91.2                                  | 0.91        | TSPAN8       | 87.9                                  | 232.3                                 | 2.64        | TPPP3        | 3.8                                   | 0.1                                   | 0.03        |
| UFD1         | 324.2                                 | 80.1                                  | 0.25        | UZSURP       | 142.9                                 | 83.4                                  | 0.58        | TSPAN6       | 152.6                                 | 980.9                                 | 6.43        | TPPP         | 56.9                                  | 11.1                                  | 0.20        |
| UFC1         | 156.8                                 | 56.7                                  | 0.36        | UZAF2        | 190.4                                 | 24.8                                  | 0.13        | TSPAN33      | 52                                    | 333.5                                 | 6.41        | TPP2         | 244                                   | 106.1                                 | 0.43        |
| UEVLD        | 111.6                                 | 166.8                                 | 1.49        | UZAF1        | 148.9                                 | 8.1                                   | 0.05        | TSPAN15      | 77.8                                  | 377                                   | 4.85        | TPP1         | 74.6                                  | 105.8                                 | 1.42        |
| UCHL5        | 152.5                                 | 45.1                                  | 0.30        | TYW1         | 89.6                                  | 210                                   | 2.34        | TSPAN1       | 281.4                                 | 1659.7                                | 5.90        | TPMT         | 109.8                                 | 26.8                                  | 0.24        |
| UCHL3        | 270.5                                 | 51.8                                  | 0.19        | TYMP         | 264.4                                 | 63.7                                  | 0.24        | TSNAX        | 132.6                                 | 72.7                                  | 0.55        | TPM4         | 7.4                                   | 0.1                                   | 0.01        |
| UCHL1        | 308.6                                 | 59.3                                  | 0.19        | TXNRD2       | 91.5                                  | 16                                    | 0.17        | TSN          | 145.6                                 | 33.4                                  | 0.23        | TPM3         | 83.5                                  | 12.5                                  | 0.15        |
| UBXN6        | 108.3                                 | 95.7                                  | 0.88        | TXNRD1       | 286.2                                 | 94                                    | 0.33        | TSFG101      | 155.2                                 | 390.3                                 | 2.51        | TPM2         | 2.2                                   | 1.3                                   | 0.59        |
| UBXN4        | 109.4                                 | 192.3                                 | 1.76        | TXNL4A       | 189.1                                 | 148.6                                 | 0.79        | TSFM         | 166.6                                 | 22.7                                  | 0.14        | TPM2         | 98.4                                  | 413.3                                 | 4.20        |
| UBXN1        | 213.7                                 | 53.1                                  | 0.25        | TXNL1        | 175.7                                 | 24.7                                  | 0.14        | TSFN15       | 115.8                                 | 57.8                                  | 0.50        | TPM1         | 38                                    | 8.6                                   | 0.23        |
| UBTF         | 45.2                                  | 13.4                                  | 0.30        | TXNDC9       | 149.7                                 | 41.7                                  | 0.28        | TRRAP        | 126                                   | 85.3                                  | 0.68        | TPM1         | 26.7                                  | 0.1                                   | 0.00        |
| UBR5         | 176.4                                 | 251.6                                 | 1.43        | TXNDC5       | 85.3                                  | 73.3                                  | 0.86        | TRPV4        | 25.1                                  | 195.6                                 | 7.79        | TPI1         | 196.3                                 | 33.7                                  | 0.17        |
| UBR4         | 125.3                                 | 107.9                                 | 0.86        | TXNDC17      | 222.3                                 | 44                                    | 0.20        | TRPM7        | 148.5                                 | 781.3                                 | 5.26        | TPD52L2      | 212.7                                 | 149.8                                 | 0.70        |
|              |                                       |                                       |             | TXNDC15      | 68.3                                  | 261.6                                 | 3.83        | TRPM4        | 118.1                                 | 619.2                                 | 5.24        | TPD52L2      | 307.7                                 | 126                                   | 0.41        |

Values are expressed as % of protein abundance in TL of human kidney cortex 1.

## Supplemental table 5 (Continued):

| Protein name | 3D RPTEC Spheroid_Lot.664995_day12_TL | 3D RPTEC Spheroid_Lot.664995_day12_PM | PM/TL ratio | Protein name | 3D RPTEC Spheroid_Lot.664995_day12_TL | 3D RPTEC Spheroid_Lot.664995_day12_PM | PM/TL ratio | Protein name | 3D RPTEC Spheroid_Lot.664995_day12_TL | 3D RPTEC Spheroid_Lot.664995_day12_PM | PM/TL ratio | Protein name | 3D RPTEC Spheroid_Lot.664995_day12_TL | 3D RPTEC Spheroid_Lot.664995_day12_PM | PM/TL ratio |
|--------------|---------------------------------------|---------------------------------------|-------------|--------------|---------------------------------------|---------------------------------------|-------------|--------------|---------------------------------------|---------------------------------------|-------------|--------------|---------------------------------------|---------------------------------------|-------------|
| TPD52L1      | 435.9                                 | 250.7                                 | 0.58        | TMEM9        | 122.8                                 | 653.5                                 | 5.32        | TMCC3        | 164.5                                 | 393                                   | 2.39        | THAP4        | 151.5                                 | 39.6                                  | 0.26        |
| TPD52        | 147.5                                 | 75.3                                  | 0.51        | TMEM87B      | 99.2                                  | 346.9                                 | 3.50        | TMBIM6       | 118.5                                 | 411.4                                 | 3.47        | THAP11       | 60.3                                  | 35.2                                  | 0.58        |
| TPCN1        | 95.4                                  | 422.8                                 | 4.43        | TMEM87A      | 136.9                                 | 735.2                                 | 5.37        | TM9SF4       | 102.2                                 | 385.3                                 | 3.77        | TGOLN2       | 77.4                                  | 308.4                                 | 3.98        |
| TPBG         | 147.3                                 | 809.5                                 | 5.50        | TMEM72       | 0.1                                   | 161.0                                 | 161.00      | TM9SF3       | 104.9                                 | 283.8                                 | 2.71        | TGM2         | 291.3                                 | 86                                    | 0.30        |
| TP53I3       | 229.4                                 | 45.2                                  | 0.20        | TMEM70       | 103.3                                 | 316.2                                 | 3.06        | TM9SF2       | 133.6                                 | 542.3                                 | 4.06        | TGFBRAP1     | 190.8                                 | 118.9                                 | 0.62        |
| TP53BP2      | 224.6                                 | 220.6                                 | 0.98        | TMEM68       | 123.4                                 | 293.4                                 | 2.38        | TM9SF1       | 130.5                                 | 442.6                                 | 3.39        | TGFB1        | 3                                     | 2.4                                   | 0.80        |
| TP53BP1      | 133                                   | 43.6                                  | 0.33        | TMEM63A      | 170.8                                 | 1502.4                                | 8.80        | TM7SF2       | 123.4                                 | 463.8                                 | 3.76        | TGFB1I1      | 8.9                                   | 0.1                                   | 0.01        |
| TP53         | 41.7                                  | 28.8                                  | 0.69        | TMEM62       | 160.7                                 | 889                                   | 5.53        | TLR3         | 80                                    | 345.4                                 | 4.32        | TFRC         | 15.6                                  | 734.6                                 | 4.71        |
| TOR3A        | 121.7                                 | 294                                   | 2.42        | TMEM43       | 96.6                                  | 335.2                                 | 3.47        | TLN2         | 124.4                                 | 138                                   | 1.11        | TFIP11       | 179.3                                 | 84.5                                  | 0.47        |
| TOR1B        | 136.5                                 | 165.4                                 | 1.21        | TMEM38B      | 82.7                                  | 315.4                                 | 3.81        | TLN1         | 108.5                                 | 56.5                                  | 0.52        | TFG          | 116.2                                 | 44.4                                  | 0.38        |
| TOR1AIP1     | 117                                   | 149.6                                 | 1.28        | TMEM33       | 58.1                                  | 222.9                                 | 3.84        | TLN3         | 160.1                                 | 98.9                                  | 0.62        | TFPC2        | 123.8                                 | 42.1                                  | 0.34        |
| TOR1A        | 85.9                                  | 236.8                                 | 2.76        | TMEM30A      | 112.2                                 | 672.5                                 | 5.99        | TKT          | 477                                   | 64.3                                  | 0.13        | TFB1M        | 138.2                                 | 54.8                                  | 0.40        |
| TOP2B        | 113.8                                 | 78.3                                  | 0.69        | TMEM263      | 309.8                                 | 110.5                                 | 0.36        | TKFC         | 19                                    | 5.6                                   | 0.29        | TFAM         | 100.9                                 | 7.3                                   | 0.07        |
| TOP2A        | 296.2                                 | 579.3                                 | 1.96        | TMEM256      | 36.9                                  | 126.1                                 | 3.42        | TKI          | 170.6                                 | 106.7                                 | 0.63        | TEX264       | 78.3                                  | 224.4                                 | 2.87        |
| TOP1         | 128.3                                 | 18.2                                  | 0.14        | TMEM245      | 32.4                                  | 70.5                                  | 2.18        | TJP2         | 420.5                                 | 333.3                                 | 0.79        | TEX2         | 62.7                                  | 115.5                                 | 1.84        |
| TOMM70       | 120.1                                 | 396.1                                 | 3.30        | TMEM230      | 118.1                                 | 343.2                                 | 2.91        | TJP1         | 76.4                                  | 91                                    | 1.19        | TEX10        | 158.2                                 | 232.3                                 | 1.47        |
| TOMM40L      | 152.3                                 | 378.9                                 | 2.49        | TMEM223      | 107.1                                 | 300.4                                 | 2.80        | TIRAP        | 64.7                                  | 34.2                                  | 0.53        | TES          | 506.7                                 | 143.4                                 | 0.28        |
| TOMM40       | 189.3                                 | 544.7                                 | 2.88        | TMEM222      | 43                                    | 257.3                                 | 5.98        | TIPRL        | 159.7                                 | 50.7                                  | 0.32        | TERF2IP      | 91.9                                  | 0.1                                   | 0.00        |
| TOMM34       | 305.8                                 | 94.3                                  | 0.31        | TMEM214      | 142                                   | 393.4                                 | 2.77        | TINAGL1      | 7.7                                   | 4.1                                   | 0.53        | TEFM         | 132.4                                 | 11.5                                  | 0.09        |
| TOMM22       | 125.9                                 | 378.4                                 | 3.01        | TMEM205      | 90.6                                  | 376.8                                 | 4.16        | TINAG        | 2.1                                   | 1.5                                   | 0.71        | TECR         | 79.8                                  | 226.4                                 | 2.84        |
| TOMM20       | 116.7                                 | 295.8                                 | 2.53        | TMEM201      | 177.7                                 | 87.6                                  | 0.49        | TIMMDC1      | 122.4                                 | 439.6                                 | 3.59        | TDRKH        | 171.5                                 | 446.1                                 | 2.60        |
| TOM1L2       | 108.5                                 | 162.9                                 | 1.50        | TMEM200A     | 405.8                                 | 4159.3                                | 10.25       | TIMM9        | 69.9                                  | 150.1                                 | 2.15        | TCTN3        | 111.9                                 | 198.1                                 | 1.77        |
| TOM1L1       | 142.8                                 | 212.6                                 | 1.49        | TMEM199      | 80.6                                  | 293.1                                 | 3.64        | TIMM8B       | 93.1                                  | 100.1                                 | 1.08        | TCP1         | 158.6                                 | 65.8                                  | 0.41        |
| TOM1         | 190.3                                 | 321.9                                 | 1.69        | TMEM192      | 166.6                                 | 1298.1                                | 7.79        | TIMM50       | 98.7                                  | 275.9                                 | 2.80        | TCOF1        | 1614                                  | 93.7                                  | 0.06        |
| TOLLIP       | 175.1                                 | 426.5                                 | 2.44        | TMEM189      | 86.1                                  | 176.8                                 | 2.05        | TIMM44       | 163.9                                 | 65.1                                  | 0.40        | TCIRG1       | 341.9                                 | 2824.4                                | 8.26        |
| TOE1         | 550.6                                 | 75.1                                  | 0.14        | TMEM185A     | 258.9                                 | 2426.4                                | 9.37        | TIMM23       | 107.5                                 | 569.6                                 | 5.30        | TCERG1       | 157.2                                 | 21.5                                  | 0.14        |
| TNXB         | 10                                    | 11.1                                  | 1.11        | TMEM176B     | 155.8                                 | 1839.4                                | 11.81       | TIMM22       | 74.3                                  | 185.1                                 | 2.49        | TCAF1        | 148.1                                 | 165.4                                 | 1.12        |
| TNS3         | 25.2                                  | 24                                    | 0.95        | TMEM168      | 104.5                                 | 581.9                                 | 5.57        | TIMM21       | 90.5                                  | 352.5                                 | 3.90        | TBRG4        | 157.7                                 | 80.4                                  | 0.51        |
| TNS2         | 15.8                                  | 21.5                                  | 1.36        | TMEM165      | 149.6                                 | 519.6                                 | 3.47        | TIMM17A      | 335.9                                 | 1385.3                                | 4.12        | TBL3         | 154.8                                 | 314.9                                 | 2.03        |
| TNS1         | 37.1                                  | 31                                    | 0.84        | TMEM143      | 56.9                                  | 241.2                                 | 4.24        | TIMM13       | 65.1                                  | 85.6                                  | 1.31        | TBL2         | 81                                    | 250.6                                 | 3.09        |
| TNPO3        | 177.8                                 | 117                                   | 0.66        | TMEM135      | 104.1                                 | 100.4                                 | 0.96        | TIGAR        | 295.5                                 | 114.2                                 | 0.39        | TBK1         | 108.4                                 | 102.9                                 | 0.95        |
| TNPO2        | 116.2                                 | 76.9                                  | 0.66        | TMEM134      | 105.9                                 | 322.7                                 | 3.05        | TIAL1        | 140.5                                 | 79.4                                  | 0.57        | TBCK         | 63                                    | 49.4                                  | 0.78        |
| TNPO1        | 118.7                                 | 115.5                                 | 0.97        | TMEM127      | 206.4                                 | 2418.6                                | 11.72       | TIA1         | 190.1                                 | 58.1                                  | 0.31        | TBCE         | 234.1                                 | 80.8                                  | 0.35        |
| TNFRSF21     | 604.4                                 | 5571.5                                | 9.22        | TMEM126A     | 72.1                                  | 329.3                                 | 4.57        | THY1         | 134.5                                 | 11.2                                  | 0.08        | TBCD         | 138.6                                 | 38.8                                  | 0.28        |
| TNFRSF10B    | 479.2                                 | 4160.1                                | 8.68        | TMEM120B     | 73                                    | 327.6                                 | 4.49        | THY1         | 22.3                                  | 145                                   | 6.50        | TBCB         | 232.2                                 | 50.1                                  | 0.22        |
| TNFRSF10A    | 236.7                                 | 1999.7                                | 8.45        | TMEM120A     | 52.5                                  | 181.6                                 | 3.46        | THUMPD3      | 166.6                                 | 64.9                                  | 0.39        | TBCA         | 245.9                                 | 41.7                                  | 0.17        |
| TNC          | 69.8                                  | 14.3                                  | 0.20        | TMEM115      | 162.4                                 | 447                                   | 2.75        | THUMPD1      | 96.8                                  | 24.5                                  | 0.25        | TBC1D9B      | 128.7                                 | 109.6                                 | 0.85        |
| TMX4         | 96.7                                  | 254.8                                 | 2.63        | TMEM111      | 97.3                                  | 223.7                                 | 2.30        | THSD7A       | 45.4                                  | 61.2                                  | 1.35        | TBC1D5       | 200.4                                 | 176.9                                 | 0.88        |
| TMX3         | 114                                   | 371.3                                 | 3.26        | TMEM109      | 77.6                                  | 259.2                                 | 3.34        | THRAP3       | 198.2                                 | 45.7                                  | 0.23        | TBC1D4       | 64.1                                  | 45.3                                  | 0.71        |
| TMX2         | 127.7                                 | 443.1                                 | 3.47        | TMEM106B     | 493.2                                 | 5418.1                                | 10.99       | THOP1        | 225.1                                 | 50.6                                  | 0.22        | TBC1D23      | 96.5                                  | 73.2                                  | 0.76        |
| TMX1         | 131.7                                 | 539.2                                 | 4.09        | TMED9        | 111.3                                 | 441.8                                 | 3.97        | THOC7        | 152.3                                 | 22.4                                  | 0.15        | TBC1D22A     | 184.5                                 | 42.3                                  | 0.23        |
| TMUB1        | 39.7                                  | 297.6                                 | 7.50        | TMED7        | 60.2                                  | 176.1                                 | 2.93        | THOC6        | 77.5                                  | 13.7                                  | 0.18        | TBC1D17      | 140.6                                 | 149.2                                 | 1.06        |
| TMT3         | 98.2                                  | 339.1                                 | 3.45        | TMED5        | 106.6                                 | 397.2                                 | 3.73        | THOC5        | 100.3                                 | 9.5                                   | 0.09        | TBC1D15      | 143.6                                 | 136.3                                 | 0.95        |
| TMPO         | 203.6                                 | 67.5                                  | 0.33        | TMED4        | 91.8                                  | 331.9                                 | 3.62        | THOC3        | 168.3                                 | 48                                    | 0.29        | TBC1D13      | 91.5                                  | 32.3                                  | 0.35        |
| TMPO         | 139.5                                 | 105                                   | 0.75        | TMED3        | 100.5                                 | 394.3                                 | 3.92        | THOC2        | 111.7                                 | 81.9                                  | 0.73        | TBC1D10B     | 417.5                                 | 443.6                                 | 1.06        |
| TMOD3        | 73.2                                  | 44.6                                  | 0.61        | TMED2        | 127.7                                 | 474.4                                 | 3.71        | THOC1        | 155.4                                 | 55.8                                  | 0.36        | TBC1D10A     | 91.2                                  | 237.5                                 | 2.60        |
| TMOD1        | 32.5                                  | 17.6                                  | 0.54        | TMED10       | 120.5                                 | 458.9                                 | 3.81        | THNSL1       | 96.1                                  | 12.3                                  | 0.13        | TAX1BP3      | 147.8                                 | 149                                   | 1.01        |
| TMLE         | 117                                   | 24.4                                  | 0.21        | TMED1        | 117.4                                 | 423.9                                 | 3.61        | THEM6        | 68.2                                  | 130.6                                 | 1.91        | TATDN1       | 187.6                                 | 49.9                                  | 0.27        |
| TMEM97       | 363.4                                 | 371.1                                 | 1.02        | TMCO3        | 288.6                                 | 989                                   | 3.43        | THBS1        | 43.8                                  | 47.9                                  | 1.09        | TARS1        | 353.9                                 | 90.6                                  | 0.26        |
| TMEM94       | 86.6                                  | 373.5                                 | 4.31        | TMCO1        | 148.5                                 | 347.4                                 | 2.34        | THBD         | 55.7                                  | 163.1                                 | 2.93        | TAROBP       | 123.8                                 | 47.9                                  | 0.39        |

Values are expressed as % of protein abundance in TL of human kidney cortex 1.

**Supplemental table 5 (Continued):**

| Protein name | 3D RPTEC Spheroid_Lot.664995_day12_TL | 3D RPTEC Spheroid_Lot.664995_day12_PM | PM/TL ratio | Protein name | 3D RPTEC Spheroid_Lot.664995_day12_TL | 3D RPTEC Spheroid_Lot.664995_day12_PM | PM/TL ratio | Protein name | 3D RPTEC Spheroid_Lot.664995_day12_TL | 3D RPTEC Spheroid_Lot.664995_day12_PM | PM/TL ratio | Protein name | 3D RPTEC Spheroid_Lot.664995_day12_TL | 3D RPTEC Spheroid_Lot.664995_day12_PM | PM/TL ratio |
|--------------|---------------------------------------|---------------------------------------|-------------|--------------|---------------------------------------|---------------------------------------|-------------|--------------|---------------------------------------|---------------------------------------|-------------|--------------|---------------------------------------|---------------------------------------|-------------|
| TAPT1        | 79.3                                  | 391.8                                 | 4.94        | STXBP3       | 144.6                                 | 519.8                                 | 3.59        | STAG2        | 69.6                                  | 53.2                                  | 0.76        | SPON1        | 151                                   | 85.7                                  | 0.57        |
| TAPBP        | 140                                   | 608.3                                 | 4.35        | STXBP2       | 91                                    | 346.4                                 | 3.81        | ST3GAL1      | 121.9                                 | 363.9                                 | 2.99        | SPNS1        | 155.2                                 | 859.8                                 | 5.54        |
| TAP2         | 162.7                                 | 774.4                                 | 4.76        | STXBP1       | 112.4                                 | 347                                   | 3.09        | ST14         | 83.2                                  | 530.6                                 | 6.38        | SPINT2       | 407.7                                 | 1415.5                                | 3.47        |
| TAP1         | 185.9                                 | 841.8                                 | 4.53        | STX8         | 87.3                                  | 680.6                                 | 7.80        | ST13         | 101.7                                 | 46.5                                  | 0.46        | SPINT1       | 185.4                                 | 756.5                                 | 4.08        |
| TAOK3        | 114.6                                 | 68.5                                  | 0.60        | STX7         | 104.1                                 | 739.2                                 | 7.10        | SSRP1        | 162.8                                 | 42.4                                  | 0.26        | SPG7         | 109.1                                 | 394.5                                 | 3.62        |
| TANGO2       | 81.1                                  | 23                                    | 0.28        | STX5         | 110.3                                 | 283.8                                 | 2.57        | SSR4         | 62.1                                  | 137.4                                 | 2.21        | SPG21        | 160.6                                 | 344.7                                 | 2.15        |
| TANC1        | 75.8                                  | 84                                    | 1.11        | STX4         | 126.8                                 | 754.6                                 | 5.95        | SSR3         | 114.2                                 | 399.9                                 | 3.50        | SPCS3        | 96.8                                  | 251.5                                 | 2.60        |
| TAMM41       | 124.2                                 | 245.5                                 | 1.98        | STX3         | 82.2                                  | 666.7                                 | 8.11        | SSR1         | 99.2                                  | 438.6                                 | 4.42        | SPCS2        | 101.2                                 | 379.5                                 | 3.75        |
| TALDO1       | 235.2                                 | 31.1                                  | 0.13        | STX2         | 154                                   | 1189.9                                | 7.73        | SSH3         | 253.5                                 | 134.1                                 | 0.53        | SPCS1        | 93.8                                  | 364.5                                 | 3.89        |
| TAGLN2       | 146.3                                 | 32.4                                  | 0.22        | STX18        | 105.8                                 | 320.8                                 | 3.03        | SSBP1        | 197.4                                 | 31.8                                  | 0.16        | SPATS2L      | 103                                   | 54.4                                  | 0.53        |
| TAGLN        | 3.1                                   | 2.7                                   | 0.87        | STX17        | 245.6                                 | 787.8                                 | 3.21        | SSB          | 156.5                                 | 32.8                                  | 0.21        | SPATA5       | 117.9                                 | 90.8                                  | 0.77        |
| TAF15        | 187.6                                 | 18.1                                  | 0.10        | STX16        | 139.9                                 | 740.5                                 | 5.29        | SRSF9        | 152.5                                 | 22                                    | 0.14        | SPATA20      | 219.9                                 | 18.8                                  | 0.09        |
| TACSTD2      | 68.1                                  | 298.9                                 | 4.39        | STX12        | 100.8                                 | 720.4                                 | 7.15        | SRSF7        | 138.4                                 | 0.3                                   | 0.00        | SPART        | 136.1                                 | 151.4                                 | 1.11        |
| TACO1        | 135.3                                 | 6.9                                   | 0.05        | STX10        | 161.1                                 | 872.3                                 | 5.41        | SRSF6        | 117                                   | 15.1                                  | 0.13        | SPAG9        | 262.8                                 | 77.9                                  | 0.30        |
| TAB1         | 136.2                                 | 50.8                                  | 0.37        | STUB1        | 127.3                                 | 336.4                                 | 2.64        | SRSF3        | 149.2                                 | 3.4                                   | 0.02        | SPAG9        | 194.6                                 | 100.1                                 | 0.51        |
| SYVN1        | 73.7                                  | 334.6                                 | 4.54        | STT3B        | 96.5                                  | 351.2                                 | 3.64        | SRSF2        | 112.5                                 | 15.6                                  | 0.14        | SPAG7        | 199.8                                 | 34.7                                  | 0.17        |
| SYTL4        | 154.8                                 | 589.7                                 | 3.81        | STT3A        | 92.8                                  | 268.5                                 | 2.89        | SRSF10       | 144                                   | 148.9                                 | 1.03        | SOWAHC       | 180.8                                 | 158.5                                 | 0.88        |
| SYPL2        | 87.4                                  | 464.2                                 | 5.31        | STRN4        | 207.4                                 | 87.1                                  | 0.42        | SRSF1        | 157.9                                 | 14.2                                  | 0.09        | SOS1         | 133.8                                 | 79.9                                  | 0.60        |
| SYPL1        | 101.3                                 | 481.8                                 | 4.76        | STRN3        | 104.6                                 | 55.8                                  | 0.53        | SRR1         | 125                                   | 26.7                                  | 0.21        | SORT1        | 63.1                                  | 238                                   | 3.77        |
| SYNRG        | 121.6                                 | 56.9                                  | 0.47        | STRN         | 124.4                                 | 62.5                                  | 0.50        | SRRM2        | 427.4                                 | 64.4                                  | 0.15        | SORL1        | 58.1                                  | 66.3                                  | 1.14        |
| SYNPO        | 1.4                                   | 0.1                                   | 0.07        | STRIP1       | 111.2                                 | 26.5                                  | 0.24        | SRRM1        | 146.4                                 | 19.8                                  | 0.14        | SORD         | 57.9                                  | 15.5                                  | 0.27        |
| SYNJ2BP      | 106.3                                 | 212.5                                 | 2.00        | STRAP        | 203                                   | 49.6                                  | 0.24        | SRR          | 828.3                                 | 634.9                                 | 0.77        | SORBS3       | 59.3                                  | 19.3                                  | 0.33        |
| SYNE2        | 116.5                                 | 96.4                                  | 0.83        | STRADA       | 97.7                                  | 98.8                                  | 1.01        | SRPRB        | 97.5                                  | 289.1                                 | 2.97        | SORBS2       | 39.2                                  | 26.3                                  | 0.67        |
| SYNE1        | 77.8                                  | 40                                    | 0.51        | STON2        | 47.8                                  | 26.4                                  | 0.55        | SRPRA        | 92.3                                  | 199.5                                 | 2.16        | SORBS1       | 33.6                                  | 24.8                                  | 0.74        |
| SYNCRIP      | 186.5                                 | 52.5                                  | 0.28        | STOML2       | 90.1                                  | 258.6                                 | 2.87        | SRPK2        | 157.5                                 | 43.6                                  | 0.28        | SON          | 148.8                                 | 94.6                                  | 0.64        |
| SYMPK        | 105.2                                 | 107.1                                 | 1.02        | STOML1       | 318.2                                 | 2718.9                                | 8.54        | SRP9         | 108.4                                 | 13.5                                  | 0.12        | SOD3         | 19.6                                  | 9                                     | 0.46        |
| SYAP1        | 113.6                                 | 65                                    | 0.57        | STOM         | 253.8                                 | 1907.6                                | 7.52        | SRP72        | 141.9                                 | 75                                    | 0.53        | SOD2         | 635.5                                 | 59.9                                  | 0.09        |
| SWAP70       | 117.7                                 | 31.4                                  | 0.27        | STMN1        | 2473.9                                | 808.6                                 | 0.33        | SRP68        | 164.4                                 | 72.4                                  | 0.44        | SOAT1        | 419.8                                 | 1767                                  | 4.21        |
| SV2A         | 140.7                                 | 383                                   | 2.72        | STK4         | 179.1                                 | 91                                    | 0.51        | SRP54        | 156.3                                 | 66.9                                  | 0.43        | SNX9         | 116.2                                 | 76.8                                  | 0.66        |
| SUSD2        | 21.3                                  | 46.4                                  | 2.18        | STK39        | 588.6                                 | 489.8                                 | 0.83        | SRP14        | 130.2                                 | 30.8                                  | 0.24        | SNX8         | 112.5                                 | 115.5                                 | 1.03        |
| SURF4        | 52.7                                  | 173.8                                 | 3.30        | STK38L       | 56.1                                  | 61.4                                  | 1.09        | SRM          | 547.9                                 | 83.6                                  | 0.15        | SNX6         | 164.6                                 | 97.3                                  | 0.59        |
| SURF1        | 107                                   | 344.5                                 | 3.22        | STK38        | 268.5                                 | 119.7                                 | 0.45        | SRI          | 81.9                                  | 40.9                                  | 0.50        | SNX5         | 79.1                                  | 53.7                                  | 0.68        |
| SUPV3L1      | 121.4                                 | 52.6                                  | 0.43        | STK3         | 154.6                                 | 81.8                                  | 0.53        | SRGAP2       | 165.2                                 | 180.4                                 | 1.09        | SNX4         | 74.9                                  | 53.1                                  | 0.71        |
| SUPT6H       | 101.9                                 | 37.3                                  | 0.37        | STK25        | 276.3                                 | 243.5                                 | 0.88        | SRC          | 191.1                                 | 658.6                                 | 3.45        | SNX30        | 48.3                                  | 40.5                                  | 0.84        |
| SUPT5H       | 124.4                                 | 29.5                                  | 0.24        | STK24        | 209.7                                 | 196.5                                 | 0.94        | SQSTM1       | 390.1                                 | 420.4                                 | 1.08        | SNX3         | 103.7                                 | 160.8                                 | 1.55        |
| SUPT16H      | 183.4                                 | 47.2                                  | 0.26        | STK11IP      | 258.1                                 | 1513.6                                | 5.86        | SQOR         | 224                                   | 654.9                                 | 2.92        | SNX29        | 56.3                                  | 66.9                                  | 1.19        |
| SUOX         | 19.3                                  | 8.6                                   | 0.45        | STIP1        | 171.4                                 | 40.1                                  | 0.23        | SQLE         | 365.4                                 | 1329                                  | 3.64        | SNX27        | 97.5                                  | 137.6                                 | 1.41        |
| SUN2         | 85.7                                  | 82.1                                  | 0.96        | STIM1        | 217.7                                 | 578.7                                 | 2.66        | SPTLC3       | 410.9                                 | 1912.9                                | 4.66        | SNX2         | 119.8                                 | 59.6                                  | 0.50        |
| SUN1         | 67.9                                  | 98.9                                  | 1.46        | STEAP4       | 15.1                                  | 25.1                                  | 1.66        | SPTLC2       | 102.2                                 | 286.3                                 | 2.80        | SNX18        | 34.6                                  | 56                                    | 1.62        |
| SUMF2        | 121.6                                 | 106.4                                 | 0.88        | STBD1        | 142.7                                 | 268.2                                 | 1.88        | SPTLC1       | 159.9                                 | 662.1                                 | 4.14        | SNX17        | 61.8                                  | 324.9                                 | 5.26        |
| SULTIC2      | 120.4                                 | 49.1                                  | 0.41        | STAU2        | 190.2                                 | 203.1                                 | 1.07        | SPTBN2       | 62.3                                  | 61.2                                  | 0.98        | SNX15        | 87.7                                  | 99.8                                  | 1.14        |
| SULTIA1      | 162.9                                 | 77.4                                  | 0.48        | STAU1        | 119.8                                 | 76.4                                  | 0.64        | SPTBN1       | 71.2                                  | 40.8                                  | 0.57        | SNX12        | 112.4                                 | 104.6                                 | 0.93        |
| SUGT1        | 236.7                                 | 77.4                                  | 0.33        | STAT6        | 81.8                                  | 61.5                                  | 0.75        | SPTB         | 86.8                                  | 66.3                                  | 0.76        | SNX11        | 248.3                                 | 1563.3                                | 6.30        |
| SUGP2        | 152                                   | 219                                   | 1.44        | STAT5B       | 65.2                                  | 51.5                                  | 0.79        | SPTAN1       | 69.1                                  | 30.6                                  | 0.44        | SNX1         | 131                                   | 119.4                                 | 0.91        |
| SUGCT        | 38.4                                  | 8.1                                   | 0.21        | STAT5A       | 87.2                                  | 63                                    | 0.72        | SPTA1        | 80.9                                  | 48.2                                  | 0.60        | SNW1         | 162.5                                 | 89.2                                  | 0.55        |
| SUCLG2       | 66.2                                  | 4.7                                   | 0.07        | STAT3        | 75.5                                  | 51.6                                  | 0.68        | SPRYD7       | 131                                   | 663.3                                 | 5.06        | SNU13        | 116.5                                 | 50.5                                  | 0.43        |
| SUCLG1       | 69.9                                  | 2.8                                   | 0.04        | STAT1        | 101.4                                 | 54.4                                  | 0.54        | SPRYD4       | 96                                    | 16.4                                  | 0.17        | SNTB2        | 97.8                                  | 263.7                                 | 2.70        |
| SUCLA2       | 76.2                                  | 9.8                                   | 0.13        | STAMBIP      | 117.2                                 | 87.7                                  | 0.75        | SPRY4        | 253.9                                 | 1846                                  | 7.27        | SNTB1        | 163.8                                 | 539.1                                 | 3.29        |
| SUB1         | 150.3                                 | 14.9                                  | 0.10        | STAM2        | 135                                   | 170.5                                 | 1.26        | SPR          | 116.5                                 | 26.6                                  | 0.23        | SNRPG        | 128.2                                 | 20.7                                  | 0.16        |
| STXBP4       | 173.2                                 | 218.6                                 | 1.26        | STAM         | 255.8                                 | 190.8                                 | 0.75        | SPPL2A       | 383.7                                 | 2508.4                                | 6.54        | SNRPE        | 141.4                                 | 5.9                                   | 0.04        |

Values are expressed as % of protein abundance in TL of human kidney cortex 1.

## Supplemental table 5 (Continued):

| Protein name | 3D RPTEC Spheroid_Lot.664995_day12_TL | 3D RPTEC Spheroid_Lot.664995_day12_PM | PM/TL ratio | Protein name | 3D RPTEC Spheroid_Lot.664995_day12_TL | 3D RPTEC Spheroid_Lot.664995_day12_PM | PM/TL ratio | Protein name | 3D RPTEC Spheroid_Lot.664995_day12_TL | 3D RPTEC Spheroid_Lot.664995_day12_PM | PM/TL ratio | Protein name | 3D RPTEC Spheroid_Lot.664995_day12_TL | 3D RPTEC Spheroid_Lot.664995_day12_PM | PM/TL ratio |
|--------------|---------------------------------------|---------------------------------------|-------------|--------------|---------------------------------------|---------------------------------------|-------------|--------------|---------------------------------------|---------------------------------------|-------------|--------------|---------------------------------------|---------------------------------------|-------------|
| SNRPD3       | 98.8                                  | 21.4                                  | 0.22        | SLC9A3       | 35.1                                  | 32.9                                  | 0.94        | SLC35A3      | 47.3                                  | 241.1                                 | 5.10        | SLC22A5      | 68.1                                  | 516                                   | 7.58        |
| SNRPD2       | 150.9                                 | 30.3                                  | 0.20        | SLC9A1       | 125.2                                 | 684.8                                 | 5.47        | SLC34A2      | 374.6                                 | 3211                                  | 8.57        | SLC22A4      | 66.3                                  | 141.3                                 | 2.13        |
| SNRPD1       | 169.3                                 | 33.7                                  | 0.20        | SLC8A1       | 1.5                                   | 7.5                                   | 5.00        | SLC33A1      | 58.3                                  | 253.6                                 | 4.35        | SLC22A2      | 55.3                                  | 128.6                                 | 2.33        |
| SNRPB2       | 350.8                                 | 51.5                                  | 0.15        | SLC7A9       | 3.3                                   | 63.6                                  | 19.27       | SLC31A1      | 135.9                                 | 1052.2                                | 7.74        | SLC22A18     | 114.3                                 | 120                                   | 1.05        |
| SNRPB        | 109.2                                 | 41.5                                  | 0.38        | SLC7A8       | 2.5                                   | 11.9                                  | 4.76        | SLC30A9      | 62.6                                  | 201.4                                 | 3.22        | SLC22A13     | 16.4                                  | 22.3                                  | 1.36        |
| SNRPA1       | 120.5                                 | 27.5                                  | 0.23        | SLC7A5       | 127.8                                 | 259.7                                 | 2.03        | SLC30A7      | 70.8                                  | 436.9                                 | 6.17        | SLC22A12     | 10.4                                  | 23.2                                  | 2.23        |
| SNRPA        | 156                                   | 21.1                                  | 0.14        | SLC7A11      | 186.6                                 | 322.4                                 | 1.73        | SLC30A5      | 125.6                                 | 430.3                                 | 3.43        | SLC22A11     | 10.9                                  | 78.4                                  | 7.19        |
| SNRNP70      | 133.1                                 | 13.2                                  | 0.10        | SLC6A8       | 41.4                                  | 277.7                                 | 6.71        | SLC30A1      | 223                                   | 1899.6                                | 8.52        | SLC20A2      | 188.5                                 | 1334.7                                | 7.08        |
| SNRNP40      | 205.3                                 | 95                                    | 0.46        | SLC6A6       | 242.1                                 | 1787.9                                | 7.38        | SLC2A9       | 286.6                                 | 2042.3                                | 7.13        | SLC20A1      | 1077.2                                | 8686.6                                | 8.06        |
| SNRNP200     | 127.3                                 | 73.7                                  | 0.58        | SLC6A19      | 3.2                                   | 0.1                                   | 0.03        | SLC2A8       | 128.3                                 | 546.5                                 | 4.26        | SLC1A5       | 196.8                                 | 1370.3                                | 6.96        |
| SNF8         | 161                                   | 81                                    | 0.50        | SLC6A13      | 35.3                                  | 277                                   | 7.85        | SLC2A6       | 840.1                                 | 7126.4                                | 8.48        | SLC1A1       | 235.6                                 | 1872.6                                | 7.95        |
| SNF1         | 148.2                                 | 58.3                                  | 0.39        | SLC5A9       | 7.3                                   | 10.4                                  | 1.42        | SLC2A5       | 53.3                                  | 151.7                                 | 2.85        | SLC19A3      | 8.8                                   | 70.6                                  | 8.02        |
| SNAPIN       | 163.6                                 | 229.2                                 | 1.40        | SLC5A8       | 14.3                                  | 66.5                                  | 4.65        | SLC2A3       | 93.3                                  | 83.8                                  | 0.90        | SLC17A5      | 370.1                                 | 1624.1                                | 4.39        |
| SNAP29       | 127.5                                 | 302.4                                 | 2.37        | SLC5A3       | 220.1                                 | 1320.1                                | 6.00        | SLC2A2       | 38                                    | 152.1                                 | 4.00        | SLC17A3      | 32.1                                  | 123.4                                 | 3.84        |
| SNAP23       | 180.7                                 | 1035.8                                | 5.73        | SLC5A2       | 7.7                                   | 6.8                                   | 0.88        | SLC2A13      | 131                                   | 989.5                                 | 7.55        | SLC16A7      | 148.2                                 | 1028.5                                | 6.94        |
| SMU1         | 107.1                                 | 14.4                                  | 0.13        | SLC5A12      | 6.9                                   | 14.4                                  | 2.09        | SLC2A11      | 43.5                                  | 176.2                                 | 4.05        | SLC16A4      | 27                                    | 155.3                                 | 5.75        |
| SMS          | 212.4                                 | 44.5                                  | 0.21        | SLC5A11      | 29.5                                  | 72.2                                  | 2.45        | SLC2A1       | 147.5                                 | 727.2                                 | 4.93        | SLC16A3      | 404.1                                 | 4212.4                                | 10.42       |
| SMPDL3B      | 280.6                                 | 1511.1                                | 5.39        | SLC5A10      | 15.7                                  | 77.1                                  | 4.91        | SLC29A1      | 53.1                                  | 347.8                                 | 6.55        | SLC16A2      | 78.3                                  | 458.9                                 | 5.86        |
| SMPD4        | 84.4                                  | 170.6                                 | 2.02        | SLC5A1       | 13.8                                  | 15.4                                  | 1.12        | SLC28A1      | 44.4                                  | 176.9                                 | 3.98        | SLC16A1      | 139.1                                 | 92.7                                  | 6.66        |
| SMPD1        | 164.6                                 | 184.6                                 | 1.12        | SLC4A7       | 322.1                                 | 2264                                  | 7.03        | SLC27A4      | 171.9                                 | 573                                   | 3.33        | SLC15A4      | 270.9                                 | 1213.9                                | 4.48        |
| SMN1         | 160.2                                 | 191.8                                 | 1.20        | SLC4A4       | 51.9                                  | 336.3                                 | 6.48        | SLC27A3      | 237                                   | 493.5                                 | 2.08        | SLC15A1      | 487.4                                 | 3936.4                                | 8.08        |
| SMIM24       | 4.7                                   | 20.4                                  | 4.34        | SLC4A4       | 62.8                                  | 523.3                                 | 8.33        | SLC27A2      | 46                                    | 177.3                                 | 3.85        | SLC14A1      | 70.9                                  | 84.5                                  | 1.19        |
| SMIM20       | 42.1                                  | 228.1                                 | 5.42        | SLC4A2       | 278.1                                 | 2252.2                                | 8.10        | SLC27A1      | 22.3                                  | 68.2                                  | 3.06        | SLC13A3      | 34                                    | 240.6                                 | 7.08        |
| SMG1         | 190.1                                 | 453.8                                 | 2.39        | SLC4A1AP     | 97.8                                  | 24.4                                  | 0.25        | SLC26A6      | 32.4                                  | 123                                   | 3.80        | SLC13A2      | 28.1                                  | 100.7                                 | 3.58        |
| SMCHD1       | 158.9                                 | 84.6                                  | 0.53        | SLC4A1       | 83.1                                  | 52.6                                  | 0.63        | SLC26A11     | 87.3                                  | 684.7                                 | 7.84        | SLC13A1      | 26.4                                  | 244.5                                 | 9.26        |
| SMC3         | 81.5                                  | 27.7                                  | 0.34        | SLC49A4      | 195.8                                 | 850.6                                 | 4.34        | SLC26A1      | 28.8                                  | 167                                   | 5.80        | SLC12A9      | 180                                   | 1411.3                                | 7.84        |
| SMC1A        | 99.6                                  | 43.7                                  | 0.44        | SLC47A2      | 54.9                                  | 130                                   | 2.37        | SLC25A6      | 108.9                                 | 422.7                                 | 3.88        | SLC12A7      | 200                                   | 1581.5                                | 7.91        |
| SMARCE1      | 140.9                                 | 40.2                                  | 0.29        | SLC47A1      | 33                                    | 231.5                                 | 7.02        | SLC25A51     | 34.8                                  | 329.2                                 | 9.46        | SLC12A6      | 101.4                                 | 606.7                                 | 5.98        |
| SMARCD2      | 92.1                                  | 82.4                                  | 0.89        | SLC44A4      | 62.7                                  | 573.2                                 | 9.14        | SLC25A5      | 66.4                                  | 229.9                                 | 3.46        | SLC12A2      | 174                                   | 1517.9                                | 8.72        |
| SMARCC2      | 109                                   | 31.9                                  | 0.29        | SLC44A2      | 59.3                                  | 124                                   | 2.09        | SLC25A46     | 52.1                                  | 132.8                                 | 2.55        | SLC12A1      | 14.5                                  | 52.9                                  | 3.65        |
| SMARCC1      | 138.1                                 | 17.9                                  | 0.13        | SLC44A2      | 18.1                                  | 116.7                                 | 6.45        | SLC25A42     | 12.8                                  | 36.5                                  | 2.85        | SLC11A2      | 124                                   | 700.7                                 | 5.65        |
| SMARCB1      | 100.9                                 | 60.2                                  | 0.60        | SLC44A1      | 80                                    | 493.9                                 | 6.17        | SLC25A40     | 83.4                                  | 179.2                                 | 2.15        | SKP1         | 138                                   | 63.3                                  | 0.46        |
| SMARCA5      | 128.8                                 | 78.5                                  | 0.61        | SLC43A2      | 55.3                                  | 108.9                                 | 1.97        | SLC25A4      | 62.5                                  | 213.7                                 | 3.42        | SKIV2L       | 109.8                                 | 47.8                                  | 0.44        |
| SMARCA4      | 65.2                                  | 43.5                                  | 0.67        | SLC41A3      | 132.8                                 | 281.9                                 | 2.12        | SLC25A35     | 131.9                                 | 506.6                                 | 3.84        | SIRT5        | 155                                   | 12.8                                  | 0.08        |
| SMARCA2      | 61.6                                  | 25.7                                  | 0.42        | SLC3A2       | 33.5                                  | 158.1                                 | 4.72        | SLC25A30     | 52.4                                  | 294.2                                 | 5.61        | SIRPA        | 250.6                                 | 788.6                                 | 3.15        |
| SMARCA1      | 55                                    | 51.7                                  | 0.94        | SLC3A1       | 108.3                                 | 441.8                                 | 4.08        | SLC25A3      | 82                                    | 329.9                                 | 4.02        | SIPA1L1      | 100.3                                 | 108.7                                 | 1.08        |
| SMAP1        | 212.3                                 | 63.9                                  | 0.30        | SLC39A8      | 921.3                                 | 6426.9                                | 6.98        | SLC25A25     | 112.1                                 | 561.9                                 | 5.01        | SIN3A        | 209.8                                 | 66.8                                  | 0.32        |
| SMAD4        | 84.5                                  | 39.8                                  | 0.47        | SLC39A6      | 195.8                                 | 1290.8                                | 6.59        | SLC25A24     | 134.8                                 | 461                                   | 3.42        | SIL1         | 143.5                                 | 156.6                                 | 1.05        |
| SMAD3        | 177.5                                 | 71.6                                  | 0.40        | SLC39A5      | 55.3                                  | 214                                   | 3.87        | SLC25A23     | 175.5                                 | 559.5                                 | 3.19        | SIGMAR1      | 194.7                                 | 245.2                                 | 1.26        |
| SLTM         | 222.8                                 | 47.2                                  | 0.21        | SLC39A4      | 300.2                                 | 2986.8                                | 9.95        | SLC25A22     | 88.3                                  | 377.9                                 | 4.28        | SIGIRR       | 62                                    | 95.4                                  | 1.54        |
| SLMAP        | 104.6                                 | 116.1                                 | 1.11        | SLC39A14     | 46.6                                  | 275.7                                 | 5.92        | SLC25A20     | 31.5                                  | 110.2                                 | 3.50        | SIAE         | 127                                   | 88.5                                  | 0.70        |
| SLK          | 173.7                                 | 161.4                                 | 0.93        | SLC39A11     | 130.2                                 | 540.4                                 | 4.15        | SLC25A19     | 152.4                                 | 520.8                                 | 3.42        | SHTN1        | 179.7                                 | 49.8                                  | 0.28        |
| SLIT2        | 70.5                                  | 43.3                                  | 0.61        | SLC39A10     | 168.1                                 | 464                                   | 2.76        | SLC25A13     | 55.4                                  | 197.4                                 | 3.56        | SHPK         | 85.9                                  | 23.6                                  | 0.27        |
| SLIRP        | 95.9                                  | 11.2                                  | 0.12        | SLC38A10     | 85.2                                  | 148.1                                 | 1.74        | SLC25A12     | 43                                    | 161.2                                 | 3.75        | SHMT2        | 142.1                                 | 19.5                                  | 0.14        |
| SLCO4C1      | 124.9                                 | 1042.4                                | 8.35        | SLC37A4      | 57.4                                  | 229.1                                 | 3.99        | SLC25A11     | 60.2                                  | 216.2                                 | 3.59        | SHMT1        | 61.5                                  | 21.5                                  | 0.35        |
| SLCO2A1      | 14.4                                  | 175.3                                 | 12.17       | SLC36A2      | 21.3                                  | 104.1                                 | 4.89        | SLC25A10     | 48.5                                  | 209.9                                 | 4.33        | SHANK2       | 109.3                                 | 366.3                                 | 3.35        |
| SLC9A7       | 133.6                                 | 480                                   | 3.59        | SLC35F6      | 206                                   | 1297.3                                | 6.30        | SLC25A1      | 74.9                                  | 322.6                                 | 4.31        | SH3TC1       | 66.4                                  | 118.9                                 | 1.79        |
| SLC9A6       | 120.9                                 | 554                                   | 4.58        | SLC35E1      | 113.7                                 | 428.1                                 | 3.77        | SLC23A1      | 9.8                                   | 50.3                                  | 5.13        | SH3PXD2B     | 284.2                                 | 139.8                                 | 0.49        |
| SLC9A3R2     | 16.2                                  | 66.3                                  | 4.09        | SLC35B2      | 146.4                                 | 558.1                                 | 3.81        | SLC22A8      | 16.5                                  | 21.2                                  | 1.28        | SH3KBP1      | 86.5                                  | 63.6                                  | 0.74        |
| SLC9A3R1     | 55.3                                  | 139.1                                 | 2.52        | SLC35A4      | 51.5                                  | 116.2                                 | 2.26        | SLC22A6      | 52.3                                  | 283.4                                 | 5.42        | SH3GL2       | 139.4                                 | 150                                   | 1.08        |

Values are expressed as % of protein abundance in TL of human kidney cortex 1.

## Supplemental table 5 (Continued):

| Protein name | 3D RPTEC Spheroid_Lot.664995_day12_TL | 3D RPTEC Spheroid_Lot.664995_day12_PM | PM/TL ratio | Protein name | 3D RPTEC Spheroid_Lot.664995_day12_TL | 3D RPTEC Spheroid_Lot.664995_day12_PM | PM/TL ratio | Protein name | 3D RPTEC Spheroid_Lot.664995_day12_TL | 3D RPTEC Spheroid_Lot.664995_day12_PM | PM/TL ratio | Protein name | 3D RPTEC Spheroid_Lot.664995_day12_TL | 3D RPTEC Spheroid_Lot.664995_day12_PM | PM/TL ratio |
|--------------|---------------------------------------|---------------------------------------|-------------|--------------|---------------------------------------|---------------------------------------|-------------|--------------|---------------------------------------|---------------------------------------|-------------|--------------|---------------------------------------|---------------------------------------|-------------|
| SH3GLB1      | 134.7                                 | 114.5                                 | 0.85        | SEPTIN4      | 13.3                                  | 2.6                                   | 0.20        | SCRIB        | 156.4                                 | 518.4                                 | 3.31        | RUFY1        | 173                                   | 199.1                                 | 1.15        |
| SH3GL2       | 30.3                                  | 17.5                                  | 0.58        | SEPTIN2      | 147.7                                 | 35.9                                  | 0.24        | SCOPE1       | 18.9                                  | 11                                    | 0.58        | RTRAF        | 131.1                                 | 25.3                                  | 0.19        |
| SH3GL1       | 110.8                                 | 52.1                                  | 0.47        | SEPTIN11     | 133.4                                 | 53.1                                  | 0.40        | SCP2         | 173.2                                 | 27.6                                  | 0.16        | RTN4IP1      | 163.4                                 | 0.1                                   | 0.00        |
| SH3BP4       | 113.3                                 | 294.2                                 | 2.60        | SEPTIN10     | 141.3                                 | 42.8                                  | 0.30        | SCO2         | 124.4                                 | 488.6                                 | 3.93        | RTN4         | 148                                   | 367.8                                 | 2.49        |
| SH3BP1       | 266.4                                 | 102.4                                 | 0.38        | SEPHS2       | 87.3                                  | 23.4                                  | 0.27        | SCO1         | 66                                    | 190.2                                 | 2.88        | RTN4         | 209.7                                 | 321.6                                 | 1.53        |
| SH3BGRL3     | 232.9                                 | 59.5                                  | 0.26        | SEPHS1       | 140.2                                 | 15.8                                  | 0.11        | SOXY         | 144.5                                 | 23.4                                  | 0.16        | RTN4         | 66                                    | 43.2                                  | 0.65        |
| SH3BGRL2     | 31.6                                  | 9.1                                   | 0.29        | SENP8        | 149.3                                 | 29.5                                  | 0.20        | SCIN         | 61.4                                  | 33                                    | 0.54        | RTN3         | 112.2                                 | 295.2                                 | 2.63        |
| SH3BGRL      | 97.8                                  | 16.3                                  | 0.17        | SELENOS      | 133.7                                 | 449                                   | 3.36        | SCFD2        | 95.8                                  | 160.7                                 | 1.68        | RTN1         | 111                                   | 241.7                                 | 2.18        |
| SGTA         | 185.9                                 | 48.7                                  | 0.26        | SELENOO      | 105.5                                 | 0.1                                   | 0.00        | SCFD1        | 141.5                                 | 189.3                                 | 1.34        | RTKN         | 115.1                                 | 91.5                                  | 0.79        |
| SGSH         | 318.2                                 | 186.4                                 | 0.59        | SELENON      | 61.3                                  | 134                                   | 2.19        | SCD          | 408.6                                 | 1276.8                                | 3.12        | RTF2         | 143.5                                 | 4.4                                   | 0.03        |
| SGPL1        | 158.4                                 | 607                                   | 3.83        | SELENOF      | 111.6                                 | 170.3                                 | 1.53        | SCCPDH       | 82.7                                  | 279.6                                 | 3.38        | RTCB         | 141                                   | 20.2                                  | 0.14        |
| SFXN5        | 40.4                                  | 95.9                                  | 2.37        | SELENBP1     | 51.1                                  | 12.1                                  | 0.24        | SCARB2       | 259.9                                 | 1993.6                                | 7.67        | RTCA         | 85.8                                  | 21                                    | 0.24        |
| SFXN4        | 81.4                                  | 274.1                                 | 3.37        | SEL1L        | 98.7                                  | 324.3                                 | 3.29        | SCARB1       | 240.7                                 | 1864.2                                | 7.74        | RSU1         | 69.8                                  | 42.2                                  | 0.60        |
| SFXN3        | 103.8                                 | 447.2                                 | 4.31        | SEH1L        | 120.7                                 | 159.2                                 | 1.32        | SCAMP4       | 133                                   | 631                                   | 4.74        | RSL1D1       | 275.8                                 | 278.8                                 | 1.01        |
| SFXN2        | 20.2                                  | 78.4                                  | 3.88        | SEC63        | 90.8                                  | 284                                   | 3.13        | SCAMP3       | 145.3                                 | 564.5                                 | 3.89        | RRP9         | 174.6                                 | 139.7                                 | 0.80        |
| SFXN1        | 52                                    | 204.5                                 | 3.93        | SEC62        | 69.2                                  | 256                                   | 3.70        | SCAMP2       | 67.6                                  | 408.9                                 | 6.05        | RRP8         | 221                                   | 195.4                                 | 0.88        |
| SFT2D3       | 119                                   | 346.3                                 | 2.91        | SEC61G       | 95.5                                  | 515.6                                 | 5.40        | SCAMP1       | 111.6                                 | 567.5                                 | 5.09        | RRP7BP       | 205.5                                 | 145.6                                 | 0.71        |
| SFRP1        | 12.6                                  | 16.9                                  | 1.34        | SEC61A1      | 100.9                                 | 356.9                                 | 3.54        | SCAF4        | 96.8                                  | 93.2                                  | 0.96        | RRP1B        | 111.6                                 | 57                                    | 0.51        |
| SFPQ         | 103.7                                 | 8.2                                   | 0.08        | SEC31A       | 149                                   | 77.6                                  | 0.52        | SBSPON       | 31.1                                  | 16.4                                  | 0.53        | RRP15        | 251.2                                 | 304.6                                 | 1.21        |
| SF3B6        | 133.5                                 | 106.7                                 | 0.80        | SEC24D       | 138.4                                 | 108.5                                 | 0.78        | SBF1         | 160.8                                 | 172                                   | 1.07        | RRP12        | 276.6                                 | 307.9                                 | 1.11        |
| SF3B4        | 132.2                                 | 35.6                                  | 0.27        | SEC24C       | 120.2                                 | 69.5                                  | 0.58        | SBDS         | 208.7                                 | 47.3                                  | 0.23        | RRP1         | 163.8                                 | 159.8                                 | 0.98        |
| SF3B3        | 133.9                                 | 68.9                                  | 0.51        | SEC24B       | 122.3                                 | 110.6                                 | 0.90        | SAT2         | 33.3                                  | 12                                    | 0.36        | RRM2B        | 324.5                                 | 94.4                                  | 0.29        |
| SF3B2        | 240.7                                 | 115.7                                 | 0.48        | SEC24A       | 141.3                                 | 74.5                                  | 0.53        | SART3        | 156.2                                 | 71.8                                  | 0.46        | RRM2         | 1757.6                                | 2087.4                                | 1.19        |
| SF3B1        | 171.2                                 | 107.5                                 | 0.63        | SEC23IP      | 157.9                                 | 100                                   | 0.63        | SART1        | 133.6                                 | 44                                    | 0.33        | RRM1         | 223.7                                 | 165.5                                 | 0.74        |
| SF3A3        | 147.1                                 | 34.5                                  | 0.23        | SEC23B       | 133.7                                 | 47.7                                  | 0.36        | SARS2        | 193.3                                 | 17                                    | 0.09        | RRBP1        | 235.5                                 | 102.7                                 | 0.44        |
| SF3A2        | 179.5                                 | 50.5                                  | 0.28        | SEC23A       | 135.3                                 | 65.8                                  | 0.49        | SARS1        | 187.8                                 | 41.8                                  | 0.22        | RRAS2        | 119.1                                 | 506.8                                 | 4.26        |
| SF3A1        | 156.5                                 | 36.3                                  | 0.23        | SEC22B       | 118.1                                 | 373.6                                 | 3.16        | SARDH        | 8.3                                   | 3                                     | 0.36        | RRAS         | 89.6                                  | 423.9                                 | 4.73        |
| SETD9        | 69.1                                  | 122.7                                 | 1.78        | SEC16A       | 131.8                                 | 131.6                                 | 1.00        | SARAF        | 94.1                                  | 442.3                                 | 4.70        | RRAGC        | 181.7                                 | 722.3                                 | 3.98        |
| SETD3        | 161.5                                 | 44.8                                  | 0.28        | SEC13        | 132.1                                 | 46.1                                  | 0.35        | SAR1B        | 105.5                                 | 143.9                                 | 1.36        | RRAGB        | 168.8                                 | 689.4                                 | 4.08        |
| SET          | 257.6                                 | 25.5                                  | 0.10        | SEC11C       | 70.8                                  | 286.4                                 | 4.05        | SAR1A        | 74.6                                  | 44.1                                  | 0.59        | RRAD         | 52.6                                  | 37.9                                  | 0.72        |
| SERPINH1     | 172                                   | 152.1                                 | 0.88        | SEC11A       | 124.9                                 | 403.9                                 | 3.23        | SAP18        | 106.6                                 | 37                                    | 0.35        | RPTOR        | 148.1                                 | 190.3                                 | 1.28        |
| SERPING1     | 14.6                                  | 17.9                                  | 1.23        | SDSL         | 232.2                                 | 42.6                                  | 0.18        | SAMM50       | 80.9                                  | 223.1                                 | 2.76        | RPSA         | 220.4                                 | 33.4                                  | 0.15        |
| SERPINF2     | 6.3                                   | 0.1                                   | 0.02        | SDR39U1      | 108.3                                 | 71.2                                  | 0.66        | SAMHD1       | 72.9                                  | 10.9                                  | 0.15        | RPS9         | 209.7                                 | 165.2                                 | 0.79        |
| SERPINF1     | 3.6                                   | 5                                     | 1.39        | SDHD         | 58.8                                  | 180.8                                 | 3.07        | SAFB         | 225.1                                 | 34.2                                  | 0.15        | RPS8         | 175.1                                 | 179.6                                 | 1.03        |
| SERPINE2     | 751                                   | 566.4                                 | 0.75        | SDHC         | 46.4                                  | 169.2                                 | 3.65        | SAE1         | 257.4                                 | 68.8                                  | 0.27        | RPS7         | 309.7                                 | 41.6                                  | 0.13        |
| SERPINB9     | 148.3                                 | 38.7                                  | 0.26        | SDHB         | 52.4                                  | 197.9                                 | 3.78        | SACM1L       | 75                                    | 269.2                                 | 3.59        | RPS6KA3      | 91.7                                  | 76.8                                  | 0.84        |
| SERPINB6     | 273.5                                 | 77.9                                  | 0.28        | SDHA         | 56.9                                  | 195.9                                 | 3.44        | SAA4         | 25.9                                  | 3.7                                   | 0.14        | RPS6KA1      | 141.7                                 | 79.7                                  | 0.56        |
| SERPINB12    | 56.9                                  | 72.2                                  | 1.27        | SDF4         | 267.3                                 | 358.3                                 | 1.34        | S100A9       | 3.5                                   | 16.8                                  | 4.80        | RPS6         | 263.9                                 | 231.8                                 | 0.88        |
| SERPINB1     | 509.6                                 | 133.2                                 | 0.26        | SDF2L1       | 64.3                                  | 114.7                                 | 1.78        | S100A8       | 3.1                                   | 16.9                                  | 5.45        | RPS5         | 212.7                                 | 108.4                                 | 0.51        |
| SERPINA7     | 9.8                                   | 20.6                                  | 2.10        | SDF2         | 245.2                                 | 466.6                                 | 1.90        | S100A7       | 91.8                                  | 149.7                                 | 1.63        | RPS4X        | 198.3                                 | 102.7                                 | 0.52        |
| SERPINA5     | 9.2                                   | 32.5                                  | 3.53        | SDCBP        | 289.7                                 | 1509.4                                | 5.21        | S100A16      | 739.3                                 | 473.7                                 | 0.64        | RPS3A        | 260.5                                 | 130.8                                 | 0.50        |
| SERPINA4     | 1.6                                   | 0.1                                   | 0.06        | SDC4         | 316.1                                 | 601.7                                 | 1.90        | S100A13      | 482                                   | 121.9                                 | 0.25        | RPS3         | 225.3                                 | 67.9                                  | 0.30        |
| SERPINA3     | 4.5                                   | 3.4                                   | 0.76        | SDC2         | 85.4                                  | 404.1                                 | 4.73        | S100A11      | 269.3                                 | 58.2                                  | 0.22        | RPS27L       | 270.7                                 | 241.7                                 | 0.89        |
| SERPINA1     | 10.7                                  | 8.4                                   | 0.79        | SDC1         | 203.3                                 | 1093.8                                | 5.38        | S100A10      | 172.9                                 | 73.1                                  | 0.42        | RPS27        | 188.2                                 | 174                                   | 0.92        |
| SERINC1      | 352.1                                 | 2697.6                                | 7.66        | SCYL3        | 85.3                                  | 59                                    | 0.69        | S100A1       | 655.5                                 | 142.8                                 | 0.22        | RPS26        | 288.8                                 | 215.8                                 | 0.75        |
| SERBP1       | 185.1                                 | 156.9                                 | 0.08        | SCYL2        | 162.1                                 | 180.8                                 | 1.12        | RXRB         | 73.9                                  | 51.8                                  | 0.70        | RPS25        | 149.3                                 | 33.8                                  | 0.23        |
| SEPTIN9      | 218.5                                 | 88.3                                  | 0.40        | SCYL1        | 139.7                                 | 129.3                                 | 0.93        | RXDD4        | 227.5                                 | 105                                   | 0.46        | RPS24        | 198.4                                 | 173.4                                 | 0.87        |
| SEPTIN8      | 98.7                                  | 56.6                                  | 0.57        | SCRN3        | 194.9                                 | 40                                    | 0.21        | RUVBL2       | 230.9                                 | 106.8                                 | 0.46        | RPS23        | 603.6                                 | 912.4                                 | 1.51        |
| SEPTIN7      | 129.3                                 | 29.4                                  | 0.23        | SCRN2        | 44.7                                  | 10.6                                  | 0.24        | RUVBL1       | 235.5                                 | 104.9                                 | 0.45        | RPS21        | 255.5                                 | 39.2                                  | 0.15        |
| SEPTIN6      | 132.3                                 | 46.4                                  | 0.35        | SCRN1        | 283                                   | 64.5                                  | 0.23        | RUFY2        | 106.7                                 | 126.8                                 | 1.19        | RPS20        | 388.4                                 | 58.2                                  | 0.15        |

Values are expressed as % of protein abundance in TL of human kidney cortex 1.

## Supplemental table 5 (Continued):

| Protein name | 3D RPTEC Spheroid_Lot.664995_day12_TL | 3D RPTEC Spheroid_Lot.664995_day12_PM | PM/TL ratio | Protein name | 3D RPTEC Spheroid_Lot.664995_day12_TL | 3D RPTEC Spheroid_Lot.664995_day12_PM | PM/TL ratio | Protein name | 3D RPTEC Spheroid_Lot.664995_day12_TL | 3D RPTEC Spheroid_Lot.664995_day12_PM | PM/TL ratio | Protein name | 3D RPTEC Spheroid_Lot.664995_day12_TL | 3D RPTEC Spheroid_Lot.664995_day12_PM | PM/TL ratio |
|--------------|---------------------------------------|---------------------------------------|-------------|--------------|---------------------------------------|---------------------------------------|-------------|--------------|---------------------------------------|---------------------------------------|-------------|--------------|---------------------------------------|---------------------------------------|-------------|
| RPS2         | 220.6                                 | 187.5                                 | 0.85        | RPL17        | 258                                   | 218                                   | 0.84        | RHOT1        | 62.5                                  | 162.4                                 | 2.60        | RBM39        | 105.3                                 | 57.4                                  | 0.55        |
| RPS19        | 535.2                                 | 60                                    | 0.11        | RPL15        | 164.8                                 | 181.9                                 | 1.10        | RHOG         | 119.1                                 | 344.2                                 | 2.89        | RBM3         | 78.8                                  | 8.1                                   | 0.10        |
| RPS18        | 193.3                                 | 409.3                                 | 2.12        | RPL14        | 219.7                                 | 216.2                                 | 0.98        | RHOF         | 319.2                                 | 1407.1                                | 4.41        | RBM28        | 141.3                                 | 223.4                                 | 1.58        |
| RPS17        | 256.1                                 | 126.8                                 | 0.50        | RPL13A       | 152.6                                 | 151.9                                 | 1.00        | RHOC         | 167.8                                 | 230.2                                 | 1.37        | RBM25        | 127                                   | 14.5                                  | 0.11        |
| RPS16        | 147                                   | 153.4                                 | 1.04        | RPL13        | 798                                   | 941.9                                 | 1.18        | RHOA         | 138.4                                 | 1461.3                                | 10.56       | RBM22        | 91.7                                  | 68.7                                  | 0.75        |
| RPS15A       | 196.7                                 | 48.1                                  | 0.24        | RPL12        | 206.5                                 | 93.4                                  | 0.45        | RHOB         | 142.1                                 | 187.2                                 | 1.32        | RBM17        | 195.7                                 | 10.3                                  | 0.05        |
| RPS15        | 190.9                                 | 143.6                                 | 0.75        | RPL11        | 220.6                                 | 37.6                                  | 0.17        | RHEB         | 152.3                                 | 182                                   | 1.20        | RBM15B       | 147                                   | 83.9                                  | 0.57        |
| RPS14        | 286                                   | 128.2                                 | 0.45        | RPL10A       | 173.8                                 | 204.5                                 | 1.18        | RHBDF1       | 81.8                                  | 652.4                                 | 7.98        | RBM15        | 130.6                                 | 54.7                                  | 0.42        |
| RPS13        | 235.6                                 | 200.4                                 | 0.85        | RPL10        | 197.2                                 | 230.2                                 | 1.17        | RHBDD2       | 190.2                                 | 806.3                                 | 4.24        | RBM14        | 161.7                                 | 29.9                                  | 0.18        |
| RPS12        | 230.4                                 | 20.3                                  | 0.09        | RPAP3        | 165.4                                 | 69                                    | 0.42        | RGN          | 44.6                                  | 18.2                                  | 0.41        | RBM12B       | 193.8                                 | 37.3                                  | 0.19        |
| RPS11        | 319.6                                 | 318.7                                 | 1.00        | RPA3         | 107.3                                 | 30.8                                  | 0.29        | RGL2         | 101.6                                 | 69.5                                  | 0.68        | RBM12        | 142.5                                 | 38.6                                  | 0.27        |
| RPS10        | 339.7                                 | 20.1                                  | 0.06        | RPA2         | 331.1                                 | 123.2                                 | 0.37        | RFTN1        | 88                                    | 503.1                                 | 5.72        | RBM10        | 142                                   | 24.5                                  | 0.17        |
| RPRD1B       | 127.4                                 | 14                                    | 0.11        | RPA1         | 144.9                                 | 55.5                                  | 0.38        | RFT1         | 106.1                                 | 432.8                                 | 4.08        | RBKS         | 94.7                                  | 17.9                                  | 0.19        |
| RPP30        | 211.7                                 | 94.3                                  | 0.45        | RP2          | 114.6                                 | 743.2                                 | 6.49        | RFK          | 192.8                                 | 29.8                                  | 0.15        | RBFA         | 140.6                                 | 29.2                                  | 0.21        |
| RPN2         | 86.6                                  | 323                                   | 3.73        | ROMO1        | 66                                    | 296.4                                 | 4.49        | RFL          | 171.5                                 | 1226.9                                | 7.15        | RBCK1        | 177.9                                 | 441.1                                 | 2.48        |
| RPN1         | 91.6                                  | 366.3                                 | 4.00        | ROCK2        | 126.5                                 | 51.1                                  | 0.40        | RFC5         | 159.7                                 | 53.8                                  | 0.34        | RBBP9        | 119.1                                 | 27.7                                  | 0.23        |
| RPLP2        | 136.6                                 | 234.8                                 | 1.72        | ROCK1        | 81.6                                  | 28.6                                  | 0.35        | RFC4         | 162.3                                 | 84.6                                  | 0.52        | RBBP7        | 282.8                                 | 55.8                                  | 0.20        |
| RPLP1        | 148.7                                 | 81.5                                  | 0.55        | RO60         | 134                                   | 31                                    | 0.23        | RFC3         | 140.9                                 | 87.8                                  | 0.62        | RBBP4        | 135.3                                 | 29.6                                  | 0.22        |
| RPLP0        | 213.5                                 | 163.8                                 | 0.77        | RNPS1        | 113.9                                 | 52.1                                  | 0.46        | RFC1         | 120.3                                 | 104.3                                 | 0.87        | RB1          | 209.9                                 | 158.1                                 | 0.75        |
| RPL9         | 210.7                                 | 22.7                                  | 0.11        | RNPEP        | 173.4                                 | 34.3                                  | 0.20        | REX04        | 758.6                                 | 702.9                                 | 0.93        | RAVER2       | 150.7                                 | 90.5                                  | 0.60        |
| RPL8         | 208.6                                 | 217.8                                 | 1.04        | RNMT         | 237.1                                 | 72.3                                  | 0.30        | REX02        | 155.3                                 | 22.1                                  | 0.14        | RAVER1       | 129.3                                 | 70.2                                  | 0.54        |
| RPL7A        | 284.2                                 | 337.1                                 | 1.19        | RNH1         | 153.5                                 | 41.9                                  | 0.27        | RETSAT       | 101.9                                 | 335.9                                 | 3.30        | RASAL1       | 348.3                                 | 302.4                                 | 0.87        |
| RPL7         | 140.1                                 | 161.4                                 | 1.15        | RNF40        | 164.9                                 | 80.6                                  | 0.49        | RETREG2      | 94.8                                  | 215                                   | 2.27        | RARS1        | 195.1                                 | 80.2                                  | 0.41        |
| RPL6         | 235                                   | 273.4                                 | 1.16        | RNF213       | 83.8                                  | 99.1                                  | 1.18        | REH1         | 100.9                                 | 326.8                                 | 3.24        | RARRES2      | 12.1                                  | 9                                     | 0.74        |
| RPL5         | 181.1                                 | 37.7                                  | 0.21        | RNF20        | 116                                   | 38.1                                  | 0.33        | REPS1        | 113.5                                 | 49.6                                  | 0.44        | RAPH1        | 182.4                                 | 55.1                                  | 0.30        |
| RPL4         | 197.5                                 | 275.9                                 | 1.40        | RNF170       | 41.7                                  | 199.9                                 | 4.79        | RENBP        | 77.1                                  | 31.7                                  | 0.41        | RAP2C        | 71                                    | 527.8                                 | 7.43        |
| RPL38        | 1157.9                                | 572                                   | 0.49        | RNF167       | 149.7                                 | 1092                                  | 7.29        | RELCH        | 138.8                                 | 104.3                                 | 0.75        | RAP2B        | 100.2                                 | 580.6                                 | 5.79        |
| RPL37A       | 372.7                                 | 324.1                                 | 0.87        | RNF149       | 376                                   | 3403.5                                | 9.05        | RELA         | 103.6                                 | 29.1                                  | 0.28        | RAP1GDS1     | 201.4                                 | 69.8                                  | 0.35        |
| RPL36A       | 30324.4                               | 29270.2                               | 0.97        | RNF14        | 130.1                                 | 65.7                                  | 0.50        | REEP6        | 23.7                                  | 52                                    | 2.19        | RAP1GAP      | 62.6                                  | 34.7                                  | 0.55        |
| RPL36        | 170                                   | 162.3                                 | 0.95        | RNF13        | 306.5                                 | 2453                                  | 8.00        | REEP5        | 100.2                                 | 290.6                                 | 2.90        | RAP1B        | 70.7                                  | 214.8                                 | 3.04        |
| RPL35A       | 196.7                                 | 219.8                                 | 1.12        | RNF128       | 340.3                                 | 3204                                  | 9.42        | REEP4        | 107.5                                 | 122.4                                 | 1.14        | RAP1A        | 70.3                                  | 254.2                                 | 3.62        |
| RPL35        | 85.4                                  | 0.1                                   | 0.00        | RNASET2      | 60.8                                  | 27.4                                  | 0.45        | REEP3        | 140                                   | 306.8                                 | 2.19        | RANGAP1      | 256.1                                 | 109                                   | 0.43        |
| RPL34        | 97.6                                  | 119.7                                 | 1.23        | RNASEL       | 71.4                                  | 37.6                                  | 0.53        | RECQL        | 340.1                                 | 61.5                                  | 0.18        | RANBP6       | 139.9                                 | 103                                   | 0.74        |
| RPL32        | 121.3                                 | 103.4                                 | 0.85        | RNASE6       | 1                                     | 0.1                                   | 0.10        | RECK         | 8.8                                   | 19.1                                  | 2.17        | RANBP3       | 301.3                                 | 48.6                                  | 0.16        |
| RPL31        | 292.3                                 | 133.5                                 | 0.46        | RNASE2       | 5.6                                   | 10.3                                  | 1.84        | RDX          | 60.6                                  | 82.2                                  | 1.36        | RANBP2       | 134.6                                 | 73.1                                  | 0.54        |
| RPL30        | 144.9                                 | 178.9                                 | 1.23        | RMND1        | 64.4                                  | 187.7                                 | 2.91        | RDH14        | 79.7                                  | 240.7                                 | 3.02        | RANBP1       | 243.6                                 | 49.1                                  | 0.20        |
| RPL3         | 180.1                                 | 206.3                                 | 1.15        | RMDN3        | 125.6                                 | 269.5                                 | 2.15        | RDH13        | 107.9                                 | 355.3                                 | 3.29        | RAN          | 230.8                                 | 53.2                                  | 0.23        |
| RPL29        | 649.8                                 | 517.4                                 | 0.80        | RMDN2        | 80                                    | 143.8                                 | 1.80        | RDH12        | 33                                    | 70.3                                  | 2.13        | RALY         | 136.3                                 | 139.5                                 | 1.02        |
| RPL28        | 206.3                                 | 427.8                                 | 2.07        | RMDN1        | 160.1                                 | 151.8                                 | 0.95        | RDH11        | 94.2                                  | 356.1                                 | 3.78        | RALGAPB      | 130.7                                 | 148.4                                 | 1.14        |
| RPL27A       | 358.1                                 | 395.9                                 | 1.11        | RIT1         | 148.6                                 | 68.2                                  | 0.46        | RDH10        | 49.1                                  | 194.9                                 | 3.97        | RALGAP2      | 55.9                                  | 49.4                                  | 0.88        |
| RPL27        | 122.3                                 | 111.3                                 | 0.91        | RIPOR1       | 79.8                                  | 145.9                                 | 1.83        | RCN2         | 93.3                                  | 89.3                                  | 0.96        | RALGAP1      | 210.5                                 | 253.5                                 | 1.20        |
| RPL26        | 344.2                                 | 302.3                                 | 0.88        | RIPK1        | 146.1                                 | 73.1                                  | 0.50        | RCN1         | 180.9                                 | 204.7                                 | 1.13        | RALB         | 129.2                                 | 707.7                                 | 5.48        |
| RPL24        | 239.9                                 | 248.2                                 | 1.03        | RIOX2        | 96.3                                  | 17.4                                  | 0.18        | RCC2         | 183.4                                 | 135.3                                 | 0.74        | RALA         | 134                                   | 851                                   | 6.35        |
| RPL23A       | 500.6                                 | 359.1                                 | 0.72        | RINT1        | 91.9                                  | 139.2                                 | 1.51        | RCC1         | 306.5                                 | 29                                    | 0.09        | RAI14        | 90.4                                  | 34.1                                  | 0.38        |
| RPL23        | 212.8                                 | 186.9                                 | 0.88        | RING1        | 113                                   | 30.6                                  | 0.27        | RBP7         | 1.8                                   | 0.1                                   | 0.06        | RAE1         | 128.4                                 | 83.8                                  | 0.65        |
| RPL22        | 124.1                                 | 19.8                                  | 0.16        | RIDA         | 37.6                                  | 32.3                                  | 0.86        | RBMX         | 182                                   | 114                                   | 0.63        | RAD50        | 152.7                                 | 37.3                                  | 0.24        |
| RPL21        | 344.4                                 | 391.4                                 | 1.14        | RICTOR       | 139.4                                 | 156.7                                 | 1.12        | RBMS1        | 121.9                                 | 25.7                                  | 0.21        | RAD23B       | 150.9                                 | 30.6                                  | 0.20        |
| RPL19        | 151.4                                 | 112.5                                 | 0.74        | RIC8A        | 148.9                                 | 159.7                                 | 1.07        | RBM8A        | 116.8                                 | 74.9                                  | 0.64        | RAD23A       | 168.7                                 | 61.4                                  | 0.36        |
| RPL18A       | 204                                   | 238.2                                 | 1.17        | RHPN2        | 154.5                                 | 145                                   | 0.94        | RBM47        | 102.1                                 | 37.5                                  | 0.37        | RAD21        | 98.3                                  | 55.1                                  | 0.56        |
| RPL18        | 180.1                                 | 216.3                                 | 1.20        | RHOT2        | 89.9                                  | 370.8                                 | 4.12        | RBM4         | 123.2                                 | 49.8                                  | 0.40        | RACK1        | 213.2                                 | 37                                    | 0.17        |

Values are expressed as % of protein abundance in TL of human kidney cortex 1.

## Supplemental table 5 (Continued):

| Protein name | 3D RPTEC Spheroid_Lot.664995_day12_TL | 3D RPTEC Spheroid_Lot.664995_day12_PM | PM/TL ratio | Protein name | 3D RPTEC Spheroid_Lot.664995_day12_TL | 3D RPTEC Spheroid_Lot.664995_day12_PM | PM/TL ratio | Protein name | 3D RPTEC Spheroid_Lot.664995_day12_TL | 3D RPTEC Spheroid_Lot.664995_day12_PM | PM/TL ratio | Protein name | 3D RPTEC Spheroid_Lot.664995_day12_TL | 3D RPTEC Spheroid_Lot.664995_day12_PM | PM/TL ratio |
|--------------|---------------------------------------|---------------------------------------|-------------|--------------|---------------------------------------|---------------------------------------|-------------|--------------|---------------------------------------|---------------------------------------|-------------|--------------|---------------------------------------|---------------------------------------|-------------|
| RAC2         | 44.8                                  | 89.1                                  | 1.99        | RAB11FIP1    | 140.3                                 | 226.9                                 | 1.62        | PTK2         | 109                                   | 75.4                                  | 0.69        | PSMB10       | 229.6                                 | 48.7                                  | 0.21        |
| RAC1         | 96.9                                  | 201.7                                 | 2.08        | RAB11B       | 98.3                                  | 230.7                                 | 2.35        | PTH1R        | 36.9                                  | 53.8                                  | 1.46        | PSMB1        | 162.9                                 | 34.3                                  | 0.21        |
| RABL6        | 502.8                                 | 160.3                                 | 0.32        | RAB10        | 101.7                                 | 278.8                                 | 2.74        | PTGS1        | 19                                    | 48.7                                  | 2.56        | PSMA7        | 175.3                                 | 34                                    | 0.19        |
| RABL3        | 80.2                                  | 187.8                                 | 2.34        | QTRT2        | 117.7                                 | 14.1                                  | 0.12        | PTGR2        | 153.5                                 | 41.4                                  | 0.27        | PSMA6        | 172.1                                 | 29                                    | 0.17        |
| RABGGTA      | 180.1                                 | 51.6                                  | 0.29        | QTRT1        | 167.2                                 | 0.1                                   | 0.00        | PTGR1        | 211.4                                 | 42.7                                  | 0.20        | PSMA5        | 180.3                                 | 38                                    | 0.21        |
| RABGEF1      | 161.4                                 | 140.5                                 | 0.87        | QSOX2        | 168.4                                 | 542.7                                 | 3.22        | PTGFRN       | 274.3                                 | 1428.8                                | 5.21        | PSMA4        | 174.3                                 | 31.6                                  | 0.18        |
| RABGAP1L     | 120.6                                 | 98.1                                  | 0.81        | QRSL1        | 248.1                                 | 14.3                                  | 0.06        | PTGES3       | 183.8                                 | 21.1                                  | 0.11        | PSMA3        | 156.6                                 | 29.3                                  | 0.19        |
| RABGAP1      | 114.6                                 | 86.8                                  | 0.76        | QRICH1       | 195.9                                 | 164.4                                 | 0.84        | PTGES2       | 96.1                                  | 180.1                                 | 1.87        | PSMA2        | 164.1                                 | 37.2                                  | 0.23        |
| RABEPK       | 269.4                                 | 82.9                                  | 0.31        | QPR1         | 209.9                                 | 73                                    | 0.35        | PTER         | 273.8                                 | 61.9                                  | 0.23        | PSMA1        | 178.2                                 | 29.2                                  | 0.16        |
| RABEP1       | 110.6                                 | 36.7                                  | 0.33        | QDPR         | 53.9                                  | 6.7                                   | 0.12        | PTDSS2       | 96.3                                  | 444.3                                 | 4.61        | PSIP1        | 99.9                                  | 18.6                                  | 0.19        |
| RAB9A        | 175.9                                 | 852.4                                 | 4.85        | QARS1        | 196.5                                 | 84.8                                  | 0.43        | PTDSS1       | 111.1                                 | 662.3                                 | 5.96        | PSEN1        | 187.1                                 | 2311.6                                | 12.35       |
| RAB8B        | 128.8                                 | 663.8                                 | 5.15        | PYGL         | 255                                   | 81.3                                  | 0.32        | PTCD3        | 186                                   | 87.5                                  | 0.47        | PSAT1        | 113.6                                 | 27                                    | 0.24        |
| RAB8A        | 79.7                                  | 330.6                                 | 4.15        | PYGB         | 248.1                                 | 54.3                                  | 0.22        | PTBP3        | 128.8                                 | 81.1                                  | 0.63        | PSAP         | 202.4                                 | 293.2                                 | 1.45        |
| RAB7A        | 154                                   | 905.7                                 | 5.88        | PYCR3        | 155.6                                 | 25.9                                  | 0.17        | PTBP1        | 149.2                                 | 52.6                                  | 0.35        | PRXL2B       | 87.7                                  | 48.4                                  | 0.55        |
| RAB6A        | 129.6                                 | 404.8                                 | 3.12        | PYCR2        | 334.4                                 | 131.8                                 | 0.39        | PSTPIP2      | 581.6                                 | 203.6                                 | 0.35        | PRXL2A       | 104.3                                 | 358.3                                 | 3.44        |
| RAB5F        | 150.4                                 | 413.4                                 | 2.75        | PXN          | 72.3                                  | 27.2                                  | 0.38        | PSPC1        | 216.8                                 | 22.6                                  | 0.10        | PRUNE2       | 44.8                                  | 19.5                                  | 0.44        |
| RAB5C        | 112.1                                 | 451.3                                 | 4.03        | PXMP2        | 47                                    | 59.6                                  | 1.27        | PSMG3        | 201                                   | 36.9                                  | 0.18        | PRSS23       | 26.2                                  | 30                                    | 1.15        |
| RAB5B        | 110.1                                 | 417.2                                 | 3.79        | PXDN         | 44.8                                  | 36.9                                  | 0.82        | PSMG2        | 538.1                                 | 0.1                                   | 0.00        | PRRC2A       | 541.5                                 | 131.2                                 | 0.24        |
| RAB5A        | 137.6                                 | 501.8                                 | 3.65        | PWP2         | 180.7                                 | 213.1                                 | 1.18        | PSMG1        | 171.2                                 | 43.4                                  | 0.25        | PRRC1        | 108.6                                 | 49.2                                  | 0.45        |
| RAB4B        | 135.6                                 | 403.9                                 | 2.98        | PWP1         | 143.2                                 | 90.9                                  | 0.63        | PSMF1        | 116.8                                 | 99.7                                  | 0.85        | PRPSAP2      | 159.5                                 | 20.5                                  | 0.13        |
| RAB4A        | 126.8                                 | 402.5                                 | 3.17        | PVR          | 104.7                                 | 661.7                                 | 6.32        | PSME3        | 439.3                                 | 69.5                                  | 0.16        | PRPSAP1      | 242.1                                 | 100.3                                 | 0.41        |
| RAB43        | 109.4                                 | 378.6                                 | 3.46        | PUS1         | 261.7                                 | 44.5                                  | 0.17        | PSME2        | 171                                   | 52.9                                  | 0.31        | PRPS2        | 263.9                                 | 65.3                                  | 0.25        |
| RAB3IP       | 371.3                                 | 92.1                                  | 0.25        | PURA         | 40.1                                  | 16.3                                  | 0.41        | PSME1        | 183.8                                 | 45.9                                  | 0.25        | PRPS1        | 138.3                                 | 27.3                                  | 0.20        |
| RAB3GAP2     | 102.7                                 | 96.5                                  | 0.94        | PUM3         | 161.4                                 | 264.4                                 | 1.64        | PSMD9        | 142.4                                 | 58.1                                  | 0.41        | PRPF8        | 127.5                                 | 91.6                                  | 0.72        |
| RAB3GAP1     | 109.8                                 | 74.7                                  | 0.68        | PUM1         | 175.1                                 | 195.5                                 | 1.12        | PSMD8        | 168.6                                 | 47.2                                  | 0.28        | PRPF6        | 136.1                                 | 29.9                                  | 0.22        |
| RAB3D        | 368.5                                 | 1656.5                                | 4.50        | PUF60        | 171                                   | 21.2                                  | 0.12        | PSMD7        | 161.5                                 | 41.3                                  | 0.26        | PRPF4B       | 109.8                                 | 74                                    | 0.67        |
| RAB3B        | 922.6                                 | 2914.4                                | 3.16        | PUDP         | 99.2                                  | 25.3                                  | 0.26        | PSMD6        | 130                                   | 36                                    | 0.28        | PRPF40A      | 102.2                                 | 19.6                                  | 0.19        |
| RAB35        | 86.7                                  | 352                                   | 4.06        | PTTG1IP      | 674.5                                 | 4969.4                                | 7.37        | PSMD5        | 174.4                                 | 51.4                                  | 0.29        | PRPF4        | 190.9                                 | 94.7                                  | 0.50        |
| RAB34        | 150.5                                 | 440.9                                 | 2.93        | PTRH2        | 134.4                                 | 533.3                                 | 3.97        | PSMD4        | 176.8                                 | 42.3                                  | 0.24        | PRPF31       | 134.7                                 | 29.4                                  | 0.22        |
| RAB32        | 334.4                                 | 1744.1                                | 5.22        | PTRH1        | 200.4                                 | 24.9                                  | 0.12        | PSMD3        | 129.5                                 | 42.9                                  | 0.33        | PRPF3        | 187.8                                 | 110.4                                 | 0.59        |
| RAB31        | 108.4                                 | 368.1                                 | 3.40        | PTPRO        | 10.6                                  | 57.3                                  | 5.41        | PSMD2        | 155.4                                 | 45.5                                  | 0.29        | PRPF19       | 118.4                                 | 54.3                                  | 0.46        |
| RAB30        | 98.5                                  | 226.4                                 | 2.30        | PTPRM        | 185.8                                 | 1215.7                                | 6.54        | PSMD14       | 180.7                                 | 51.1                                  | 0.28        | PROM2        | 64.6                                  | 72.6                                  | 1.12        |
| RAB2B        | 112.9                                 | 540.7                                 | 4.79        | PTPRJ        | 240.7                                 | 1392.1                                | 5.78        | PSMD13       | 158.6                                 | 49.3                                  | 0.31        | PROM1        | 336.9                                 | 2853.6                                | 8.47        |
| RAB2A        | 108.5                                 | 349.4                                 | 3.22        | PTPRG        | 170.4                                 | 1142.3                                | 6.70        | PSMD12       | 137.9                                 | 58                                    | 0.42        | PRODH2       | 21.7                                  | 17.5                                  | 0.81        |
| RAB29        | 82.9                                  | 435.6                                 | 5.25        | PTPRF        | 192.6                                 | 1039.6                                | 5.40        | PSMD11       | 146                                   | 50.4                                  | 0.35        | PRODH        | 69.2                                  | 159.8                                 | 2.31        |
| RAB27B       | 564.6                                 | 2601.6                                | 4.61        | PTPRE        | 183.8                                 | 1061.8                                | 5.78        | PSMD10       | 141.3                                 | 40.8                                  | 0.29        | PROCR        | 58.9                                  | 149.2                                 | 2.53        |
| RAB27A       | 161.7                                 | 723.3                                 | 4.47        | PTPRD        | 107.4                                 | 770.3                                 | 7.17        | PSMD1        | 153.7                                 | 53.4                                  | 0.35        | PRNP         | 73.7                                  | 539.2                                 | 7.32        |
| RAB24        | 61.3                                  | 221                                   | 3.61        | PTPRC        | 12.6                                  | 20                                    | 1.59        | PSMC6        | 182.6                                 | 61.8                                  | 0.34        | PRMT9        | 107.3                                 | 77.1                                  | 0.72        |
| RAB23        | 163.5                                 | 545.4                                 | 3.34        | PTPRA        | 99                                    | 598.8                                 | 6.05        | PSMC5        | 155.9                                 | 50.2                                  | 0.32        | PRMT5        | 148.2                                 | 19.3                                  | 0.13        |
| RAB22A       | 125.3                                 | 573.5                                 | 4.58        | PTPN6        | 102.8                                 | 86.4                                  | 0.84        | PSMC4        | 161.1                                 | 45.5                                  | 0.28        | PRMT3        | 407.1                                 | 116.4                                 | 0.29        |
| RAB21        | 72                                    | 198.5                                 | 2.76        | PTPN23       | 120.9                                 | 152.5                                 | 1.26        | PSMC3        | 160.3                                 | 41.5                                  | 0.26        | PRMT1        | 230.6                                 | 62.5                                  | 0.27        |
| RAB20        | 102.1                                 | 806.8                                 | 7.90        | PTPN2        | 158.8                                 | 282.2                                 | 1.78        | PSMC2        | 159.9                                 | 45.5                                  | 0.28        | PRKRA        | 190.8                                 | 170.2                                 | 0.89        |
| RAB1B        | 109.6                                 | 378.2                                 | 3.45        | PTPN13       | 106.8                                 | 257.2                                 | 2.41        | PSMC1        | 170.3                                 | 50.3                                  | 0.30        | PRKDC        | 181.8                                 | 31.3                                  | 0.17        |
| RAB1A        | 105.3                                 | 360.5                                 | 3.42        | PTPN12       | 147.8                                 | 68.2                                  | 0.46        | PSMB8        | 216.1                                 | 41                                    | 0.19        | PRKD2        | 126.8                                 | 107.6                                 | 0.85        |
| RAB18        | 93.2                                  | 299.7                                 | 3.22        | PTPN11       | 192.3                                 | 130                                   | 0.68        | PSMB7        | 182.6                                 | 32.2                                  | 0.18        | PRKD1        | 169                                   | 217.3                                 | 1.29        |
| RAB17        | 77.4                                  | 479.5                                 | 6.20        | PTPN1        | 281.7                                 | 848.6                                 | 3.01        | PSMB6        | 141.8                                 | 98.6                                  | 0.70        | PRKCSH       | 137                                   | 132.3                                 | 0.97        |
| RAB14        | 83.6                                  | 330.8                                 | 3.96        | PTPMT1       | 81.9                                  | 204.6                                 | 2.50        | PSMB5        | 80.4                                  | 19                                    | 0.24        | PRKCI        | 49.9                                  | 79.8                                  | 1.60        |
| RAB13        | 158.2                                 | 426.8                                 | 2.70        | PTPA         | 129.6                                 | 34.6                                  | 0.27        | PSMB4        | 169.2                                 | 28.2                                  | 0.17        | PRKCD        | 134.8                                 | 74.8                                  | 0.55        |
| RAB11FIP5    | 147.1                                 | 156.5                                 | 1.06        | PTP4A2       | 158.8                                 | 262.2                                 | 1.65        | PSMB3        | 154.8                                 | 32.4                                  | 0.21        | PRKCA        | 69.8                                  | 81.9                                  | 1.17        |
| RAB11FIP3    | 30                                    | 0.1                                   | 0.00        | PTK7         | 36.2                                  | 108.7                                 | 3.00        | PSMB2        | 189.1                                 | 36.2                                  | 0.19        | PRKAR2B      | 20.7                                  | 3.8                                   | 0.18        |

Values are expressed as % of protein abundance in TL of human kidney cortex 1.

## Supplemental table 5 (Continued):

| Protein name | 3D RPTEC Spheroid_Lot.664995_day12_TL | 3D RPTEC Spheroid_Lot.664995_day12_PM | PM/TL ratio | Protein name | 3D RPTEC Spheroid_Lot.664995_day12_TL | 3D RPTEC Spheroid_Lot.664995_day12_PM | PM/TL ratio | Protein name | 3D RPTEC Spheroid_Lot.664995_day12_TL | 3D RPTEC Spheroid_Lot.664995_day12_PM | PM/TL ratio | Protein name | 3D RPTEC Spheroid_Lot.664995_day12_TL | 3D RPTEC Spheroid_Lot.664995_day12_PM | PM/TL ratio |
|--------------|---------------------------------------|---------------------------------------|-------------|--------------|---------------------------------------|---------------------------------------|-------------|--------------|---------------------------------------|---------------------------------------|-------------|--------------|---------------------------------------|---------------------------------------|-------------|
| PRKAR2A      | 113.8                                 | 175.4                                 | 1.54        | PPL          | 163.5                                 | 56.5                                  | 0.35        | PNP          | 86.8                                  | 21.4                                  | 0.25        | PLAA         | 201.2                                 | 53.6                                  | 0.27        |
| PRKAR1A      | 100.5                                 | 102.4                                 | 1.02        | PPIP5K2      | 222.2                                 | 54.7                                  | 0.25        | PNO1         | 170.6                                 | 84.7                                  | 0.50        | PLA2G4C      | 376.1                                 | 1029.7                                | 2.74        |
| PRKAG1       | 112.3                                 | 141                                   | 1.26        | PPIL4        | 97.6                                  | 93.9                                  | 0.96        | PNN          | 146.5                                 | 92.6                                  | 0.63        | PLA2G4A      | 40.6                                  | 45.6                                  | 1.12        |
| PRKACA       | 106.6                                 | 136.3                                 | 1.28        | PPIL3        | 56.9                                  | 10.5                                  | 0.18        | PNKP         | 186.7                                 | 16                                    | 0.09        | PLA2G15      | 257.1                                 | 120.4                                 | 0.47        |
| PRKAB1       | 114.3                                 | 139.7                                 | 1.22        | PPIL1        | 244.4                                 | 247.2                                 | 1.01        | PNKD         | 115                                   | 368.8                                 | 3.21        | PKP4         | 133.7                                 | 602.8                                 | 4.51        |
| PRKAA2       | 106.2                                 | 124.2                                 | 1.17        | PIIH         | 149.6                                 | 98.7                                  | 0.66        | PNKD         | 82.5                                  | 424.4                                 | 5.14        | PKP2         | 54.2                                  | 97.9                                  | 1.81        |
| PRKAA1       | 118.7                                 | 159.6                                 | 1.34        | PIIG         | 124.5                                 | 24.7                                  | 0.20        | PMVK         | 75.2                                  | 35.5                                  | 0.47        | PKN2         | 198.2                                 | 133.4                                 | 0.67        |
| PREPL        | 77.8                                  | 44.9                                  | 0.58        | PIIF         | 190                                   | 12.9                                  | 0.07        | PMPCB        | 181.8                                 | 16.5                                  | 0.09        | PKM          | 539.3                                 | 128.7                                 | 0.24        |
| PREP         | 260.8                                 | 67.1                                  | 0.26        | PPID         | 221.5                                 | 64.8                                  | 0.29        | PMPCA        | 194.6                                 | 13.4                                  | 0.07        | PKLR         | 60.5                                  | 16.4                                  | 0.27        |
| PRELP        | 4.6                                   | 5.8                                   | 1.26        | PPIC         | 197.4                                 | 118.3                                 | 0.60        | PMP2         | 2.9                                   | 3.1                                   | 1.07        | PKD2         | 97.4                                  | 410.1                                 | 4.31        |
| PREB         | 86.5                                  | 417.7                                 | 4.83        | PPIB         | 134.3                                 | 89.2                                  | 0.66        | PMM2         | 286.9                                 | 73.5                                  | 0.26        | PITRM1       | 229.3                                 | 17.3                                  | 0.08        |
| PRDX6        | 104.2                                 | 21.8                                  | 0.21        | PPFIBP1      | 192.3                                 | 136.5                                 | 0.71        | PML          | 236                                   | 82.2                                  | 0.35        | PITPNB       | 263.8                                 | 131.2                                 | 0.50        |
| PRDX5        | 186.4                                 | 26                                    | 0.14        | PPFIA1       | 132.3                                 | 131.3                                 | 0.99        | PLXNB2       | 140                                   | 962.7                                 | 6.88        | PITPNA       | 212.6                                 | 66.9                                  | 0.31        |
| PRDX4        | 233.5                                 | 188.9                                 | 0.81        | PPCS         | 93.9                                  | 47.2                                  | 0.50        | PLXNB1       | 150.2                                 | 803.8                                 | 5.35        | PITHD1       | 123.1                                 | 46.5                                  | 0.38        |
| PRDX3        | 127.6                                 | 16.1                                  | 0.13        | PPAT         | 421.1                                 | 182.1                                 | 0.43        | PLXDC2       | 66.2                                  | 567.3                                 | 8.57        | PISD         | 117.4                                 | 505.9                                 | 4.31        |
| PRDX2        | 157.6                                 | 39.1                                  | 0.25        | PPA2         | 126.6                                 | 7.6                                   | 0.06        | PLXVAP       | 6                                     | 7.3                                   | 1.22        | PIR          | 101.6                                 | 58.5                                  | 0.58        |
| PRCP         | 132.8                                 | 51.8                                  | 0.39        | PPA1         | 360.1                                 | 74.5                                  | 0.21        | PLTP         | 17.6                                  | 16                                    | 0.91        | PIPOX        | 6.8                                   | 2.7                                   | 0.40        |
| PRAF2        | 127.5                                 | 306.7                                 | 2.41        | POU3F3       | 150.4                                 | 74.3                                  | 0.49        | PLSCR4       | 15.5                                  | 89.3                                  | 5.76        | PIP5K1C      | 80.8                                  | 90.6                                  | 1.12        |
| PPWD1        | 124.4                                 | 0.1                                   | 0.00        | POSTN        | 6                                     | 3.6                                   | 0.60        | PLSCR3       | 138.3                                 | 886.2                                 | 6.41        | PIP5K1A      | 99.7                                  | 66.3                                  | 0.66        |
| PPT2         | 394.5                                 | 293.9                                 | 0.74        | POR          | 61.2                                  | 216.6                                 | 3.54        | PLSCR1       | 112.2                                 | 710                                   | 6.33        | PIP4P1       | 128.5                                 | 1202.4                                | 9.36        |
| PPT1         | 80.7                                  | 65.4                                  | 0.81        | POP1         | 240.6                                 | 110.1                                 | 0.46        | PLS3         | 149.2                                 | 57.3                                  | 0.38        | PIP4K2C      | 100.3                                 | 28.9                                  | 0.29        |
| PPP6R3       | 211.1                                 | 97.1                                  | 0.46        | PON2         | 214.1                                 | 730.5                                 | 3.41        | PLS1         | 159.9                                 | 87.9                                  | 0.55        | PIP4K2B      | 140.6                                 | 57.3                                  | 0.41        |
| PPP6C        | 173.6                                 | 43.9                                  | 0.25        | POMK         | 122                                   | 321                                   | 2.63        | PLRG1        | 236.1                                 | 162.7                                 | 0.69        | PIP4K2A      | 92.5                                  | 26.4                                  | 0.29        |
| PPP5C        | 219.5                                 | 51.9                                  | 0.24        | POMGNT2      | 69.7                                  | 126.6                                 | 1.82        | PLPPP3       | 31.6                                  | 225.1                                 | 7.12        | PIN4         | 177.4                                 | 60.5                                  | 0.34        |
| PPP4R3A      | 111.7                                 | 82.2                                  | 0.74        | POMGNT1      | 78.2                                  | 236.2                                 | 3.02        | PLPPP1       | 127.5                                 | 504.5                                 | 3.96        | PIN1         | 150.4                                 | 61.6                                  | 0.41        |
| PPP4R2       | 119.5                                 | 16.9                                  | 0.14        | POM121C      | 274.7                                 | 213                                   | 0.78        | PLPBP        | 157.5                                 | 34.2                                  | 0.22        | PIK3R4       | 112.8                                 | 100                                   | 0.89        |
| PPP4C        | 181.2                                 | 46.2                                  | 0.25        | POLR3B       | 138.7                                 | 44.7                                  | 0.32        | PLP2         | 218.3                                 | 1236.2                                | 5.66        | PIK3R2       | 98.4                                  | 147.5                                 | 1.50        |
| PPP3CC       | 119.3                                 | 113.1                                 | 0.95        | POLR3A       | 203.4                                 | 65.9                                  | 0.32        | PLOD3        | 255.7                                 | 168.7                                 | 0.66        | PIK3CB       | 122.7                                 | 77.1                                  | 0.63        |
| PPP2R5E      | 153.4                                 | 91.3                                  | 0.60        | POLR2H       | 218                                   | 118.8                                 | 0.54        | PLOD2        | 298.1                                 | 194.1                                 | 0.65        | PIK3C3       | 117                                   | 82.9                                  | 0.71        |
| PPP2R5D      | 154.3                                 | 115.8                                 | 0.75        | POLR2G       | 145.9                                 | 21.9                                  | 0.15        | PLOD1        | 149.8                                 | 98.4                                  | 0.66        | PIK3C2A      | 108.9                                 | 91.5                                  | 0.84        |
| PPP2R5C      | 125.7                                 | 62.5                                  | 0.50        | POLR2E       | 167.3                                 | 33.1                                  | 0.20        | PLLP         | 27.2                                  | 132.8                                 | 4.88        | PIGU         | 92.4                                  | 334.1                                 | 3.62        |
| PPP2R5A      | 179.1                                 | 96.5                                  | 0.54        | POLR2B       | 150.9                                 | 49.5                                  | 0.33        | PLIN3        | 489.1                                 | 351.8                                 | 0.72        | PIGT         | 118.5                                 | 330.4                                 | 2.79        |
| PPP2R3A      | 261.8                                 | 179.7                                 | 0.69        | POLR2A       | 136                                   | 62.8                                  | 0.46        | PLIN2        | 168.7                                 | 176.2                                 | 1.04        | PIGS         | 114.1                                 | 361.5                                 | 3.17        |
| PPP2R2A      | 149.4                                 | 47.7                                  | 0.32        | POLR1D       | 146.1                                 | 43.9                                  | 0.30        | PLG          | 1.3                                   | 6.2                                   | 4.77        | PIGR         | 11.9                                  | 26.4                                  | 2.22        |
| PPP2R1A      | 147.7                                 | 49.8                                  | 0.34        | POLRIC       | 213.4                                 | 119.3                                 | 0.56        | PLEKHA7      | 28.9                                  | 86.6                                  | 3.00        | PIGO         | 95.2                                  | 367.3                                 | 3.86        |
| PPP2CB       | 177.2                                 | 64.8                                  | 0.37        | POLR1B       | 149.4                                 | 52.1                                  | 0.35        | PLEKHA6      | 144.4                                 | 393.4                                 | 2.72        | PIGK         | 124.6                                 | 459.9                                 | 3.69        |
| PPP2CA       | 175.8                                 | 47.7                                  | 0.27        | POLDIP3      | 155.8                                 | 29.7                                  | 0.19        | PLEKHA5      | 182.4                                 | 307.9                                 | 1.69        | PIGG         | 148.7                                 | 704.4                                 | 4.74        |
| PPP1R9B      | 138.9                                 | 71.4                                  | 0.51        | POLDIP2      | 157.1                                 | 19.2                                  | 0.12        | PLEK2        | 216.1                                 | 39.8                                  | 0.18        | PIEZO1       | 59.6                                  | 466.7                                 | 7.83        |
| PPP1R8       | 145.6                                 | 2                                     | 0.01        | POLD1        | 150.1                                 | 48.5                                  | 0.32        | PLEC         | 144.6                                 | 65.7                                  | 0.45        | PICALM       | 121.4                                 | 68.5                                  | 0.56        |
| PPP1R7       | 208.8                                 | 36.8                                  | 0.18        | POLB         | 205.7                                 | 57.9                                  | 0.28        | PLD3         | 150.3                                 | 673.8                                 | 4.48        | PI4KB        | 73.8                                  | 56.9                                  | 0.77        |
| PPP1R21      | 75.7                                  | 42.2                                  | 0.56        | POGLUT3      | 64.3                                  | 42.2                                  | 0.66        | PLCXD3       | 4.1                                   | 1.4                                   | 0.34        | PI4KA        | 100                                   | 425.1                                 | 4.25        |
| PPP1R12A     | 105.6                                 | 28.6                                  | 0.27        | POGLUT2      | 164.4                                 | 140.7                                 | 0.86        | PLCL1        | 49.3                                  | 35.9                                  | 0.73        | PI4K2A       | 201.8                                 | 1246.2                                | 6.18        |
| PPP1R10      | 289.4                                 | 30.7                                  | 0.11        | POGLUT1      | 145.1                                 | 126.2                                 | 0.87        | PLCG2        | 19                                    | 11.2                                  | 0.59        | PHYHIP1L     | 249.9                                 | 126.8                                 | 0.51        |
| PPP1CC       | 153.5                                 | 155.9                                 | 1.02        | POFUT2       | 109.4                                 | 115.8                                 | 1.06        | PLCD4        | 52.4                                  | 13.2                                  | 0.25        | PHYHD1       | 101.4                                 | 54.3                                  | 0.54        |
| PPP1CB       | 149.9                                 | 136.5                                 | 0.91        | POFUT1       | 142.1                                 | 108.4                                 | 0.76        | PLCD3        | 263.7                                 | 1536                                  | 5.82        | PHYH         | 97.9                                  | 18.1                                  | 0.18        |
| PPME1        | 274.3                                 | 76                                    | 0.28        | PODXL        | 8.7                                   | 5.1                                   | 0.59        | PLCD1        | 31.9                                  | 92.8                                  | 2.91        | PHPT1        | 133.2                                 | 27.2                                  | 0.20        |
| PPM1G        | 342.2                                 | 37.5                                  | 0.11        | PNPT1        | 124.7                                 | 12.1                                  | 0.10        | PLCB4        | 564.7                                 | 444.6                                 | 0.79        | PHLDB2       | 101.1                                 | 81.8                                  | 0.81        |
| PPM1F        | 71.1                                  | 35.6                                  | 0.50        | PNPO         | 170.3                                 | 89.4                                  | 0.52        | PLBD2        | 445.4                                 | 205.4                                 | 0.46        | PHLDB1       | 120.6                                 | 115.7                                 | 0.96        |
| PPM1B        | 217.7                                 | 60.1                                  | 0.28        | PNPLA8       | 119                                   | 139                                   | 1.17        | PLAUR        | 60.6                                  | 113.3                                 | 1.87        | PHKG2        | 176.5                                 | 59.6                                  | 0.34        |
| PPM1A        | 125.8                                 | 32.5                                  | 0.26        | PNPLA6       | 149.6                                 | 488                                   | 3.26        | PLAU         | 260                                   | 307.7                                 | 1.18        | PHKB         | 132.2                                 | 77.6                                  | 0.59        |

Values are expressed as % of protein abundance in TL of human kidney cortex 1.



## Supplemental table 5 (Continued):

| Protein name | 3D RPTEC Spheroid_Lot.664995_day12_TL | 3D RPTEC Spheroid_Lot.664995_day12_PM | PM/TL ratio | Protein name | 3D RPTEC Spheroid_Lot.664995_day12_TL | 3D RPTEC Spheroid_Lot.664995_day12_PM | PM/TL ratio | Protein name | 3D RPTEC Spheroid_Lot.664995_day12_TL | 3D RPTEC Spheroid_Lot.664995_day12_PM | PM/TL ratio | Protein name | 3D RPTEC Spheroid_Lot.664995_day12_TL | 3D RPTEC Spheroid_Lot.664995_day12_PM | PM/TL ratio |
|--------------|---------------------------------------|---------------------------------------|-------------|--------------|---------------------------------------|---------------------------------------|-------------|--------------|---------------------------------------|---------------------------------------|-------------|--------------|---------------------------------------|---------------------------------------|-------------|
| PHKA2        | 83.8                                  | 37.1                                  | 0.44        | PDXK         | 112.1                                 | 20.8                                  | 0.19        | PCBD2        | 115.1                                 | 13.7                                  | 0.12        | P4HB         | 140.7                                 | 121.1                                 | 0.86        |
| PHKA1        | 512.1                                 | 200.4                                 | 0.39        | PDXDC1       | 113.7                                 | 70.4                                  | 0.62        | PCBD1        | 135.2                                 | 21.7                                  | 0.16        | P4HA1        | 92.9                                  | 129.5                                 | 1.39        |
| PHGDH        | 77.1                                  | 22.2                                  | 0.29        | PDS5B        | 53.5                                  | 40.4                                  | 0.76        | PC           | 34.1                                  | 4.4                                   | 0.13        | P4HA1        | 146.6                                 | 80.3                                  | 0.55        |
| PHF6         | 579.8                                 | 62.3                                  | 0.11        | PDS5A        | 131.3                                 | 111.4                                 | 0.85        | PBXIP1       | 274.1                                 | 1051.4                                | 3.84        | P3H3         | 43.8                                  | 14.9                                  | 0.34        |
| PHB2         | 87.8                                  | 338.1                                 | 3.85        | P DPR        | 77                                    | 6.6                                   | 0.09        | PBX1         | 35.9                                  | 59.6                                  | 1.66        | P3H1         | 203.8                                 | 161.3                                 | 0.79        |
| PHB          | 107.2                                 | 401.3                                 | 3.74        | PDPK1        | 102.5                                 | 85.6                                  | 0.84        | PBLD         | 15.8                                  | 7                                     | 0.44        | P2RX4        | 129.1                                 | 641.5                                 | 4.97        |
| PHAX         | 187                                   | 16.8                                  | 0.09        | PDP1         | 103.1                                 | 11.1                                  | 0.11        | PBDC1        | 168.5                                 | 65.2                                  | 0.39        | OXSR1        | 110                                   | 61.6                                  | 0.56        |
| PGRMC2       | 55                                    | 210.3                                 | 3.82        | PDLIM7       | 29.5                                  | 18.8                                  | 0.64        | PAXX         | 170.6                                 | 43.5                                  | 0.25        | OXSM         | 140.7                                 | 14.5                                  | 0.10        |
| PGRMC1       | 23.6                                  | 101.9                                 | 4.32        | PDLIM5       | 98.5                                  | 32.3                                  | 0.33        | PAXBP1       | 124.7                                 | 52.6                                  | 0.42        | OXNAD1       | 182.3                                 | 31.6                                  | 0.17        |
| PGPEP1       | 347.7                                 | 121.6                                 | 0.35        | PDLIM2       | 4.9                                   | 2                                     | 0.41        | PATJ         | 104.1                                 | 365.1                                 | 3.51        | OXCT1        | 313.4                                 | 17.9                                  | 0.06        |
| PGP          | 359.8                                 | 53.4                                  | 0.15        | PDLIM1       | 113.9                                 | 43.8                                  | 0.38        | PARVA        | 51.8                                  | 47.7                                  | 0.92        | OXAIL        | 50.9                                  | 190.6                                 | 3.74        |
| PGM3         | 216.8                                 | 70.4                                  | 0.32        | PK3          | 49.7                                  | 8.6                                   | 0.17        | PARS2        | 119.5                                 | 36.8                                  | 0.31        | OVCA2        | 121                                   | 42.7                                  | 0.35        |
| PGM2         | 198.1                                 | 30.5                                  | 0.15        | PK2          | 29                                    | 7.6                                   | 0.26        | PARP9        | 164.9                                 | 133                                   | 0.81        | OTUD7B       | 127.1                                 | 71.5                                  | 0.56        |
| PGM1         | 141.8                                 | 30.6                                  | 0.22        | PK1          | 112.9                                 | 41.4                                  | 0.37        | PARP4        | 325.5                                 | 670.7                                 | 2.06        | OTUB1        | 202.5                                 | 55.2                                  | 0.27        |
| PGLS         | 141.8                                 | 33.9                                  | 0.24        | PDI A6       | 116                                   | 124.3                                 | 1.07        | PARP14       | 189.4                                 | 257.5                                 | 1.36        | OSTM1        | 343.4                                 | 2432.7                                | 7.08        |
| PGK2         | 307.9                                 | 61.2                                  | 0.20        | PDI A5       | 142.3                                 | 89.8                                  | 0.63        | PARP10       | 86.2                                  | 59.3                                  | 0.69        | OSTF1        | 132.2                                 | 86.7                                  | 0.66        |
| PGK1         | 177.7                                 | 40.5                                  | 0.23        | PDI A4       | 110.4                                 | 76.5                                  | 0.69        | PARP1        | 341.7                                 | 84.7                                  | 0.25        | OSTC         | 105.8                                 | 190.4                                 | 1.80        |
| PGGT1B       | 197.8                                 | 47.4                                  | 0.24        | PDI A3       | 110.2                                 | 151.7                                 | 1.38        | PARN         | 193.4                                 | 103.1                                 | 0.53        | OSGEPL1      | 109.1                                 | 45.2                                  | 0.41        |
| PGD          | 262                                   | 61.3                                  | 0.23        | PDHX         | 163.8                                 | 25.8                                  | 0.16        | PARM1        | 21                                    | 79.3                                  | 3.78        | OSBPL9       | 220.3                                 | 74                                    | 0.34        |
| PGAM5        | 186.7                                 | 561.5                                 | 3.01        | PDHB         | 168.8                                 | 6.9                                   | 0.04        | PARL         | 73                                    | 272.9                                 | 3.74        | OSBPL8       | 56.4                                  | 135                                   | 2.39        |
| PGAM1        | 243.4                                 | 52.3                                  | 0.21        | PDHA1        | 170.9                                 | 13.1                                  | 0.08        | PARK7        | 184.5                                 | 30                                    | 0.16        | OSBPL3       | 454.4                                 | 180.6                                 | 0.40        |
| PFN2         | 87.9                                  | 38.2                                  | 0.43        | PDGFRB       | 25.9                                  | 28.5                                  | 1.10        | PARD6B       | 159.7                                 | 196                                   | 1.23        | OSBPL2       | 139.9                                 | 26.8                                  | 0.19        |
| PFN2         | 120.6                                 | 29.5                                  | 0.24        | PDGFRA       | 9.2                                   | 9.3                                   | 1.01        | PAPSS2       | 86.7                                  | 37.1                                  | 0.43        | OSBPL11      | 220.5                                 | 106.2                                 | 0.48        |
| PFN1         | 277.1                                 | 59.1                                  | 0.21        | PDF          | 127.7                                 | 334.5                                 | 2.62        | PAPSS1       | 223.1                                 | 67.1                                  | 0.30        | OSBPL10      | 130.5                                 | 89.7                                  | 0.69        |
| PFKP         | 292.5                                 | 73.6                                  | 0.25        | PDE12        | 184.9                                 | 23                                    | 0.12        | PAPOLA       | 649.5                                 | 243                                   | 0.37        | OSBP         | 109.8                                 | 81.7                                  | 0.74        |
| PFKM         | 116.6                                 | 31.7                                  | 0.27        | PDCL3        | 161.1                                 | 106.6                                 | 0.66        | PAPLN        | 16.8                                  | 11.2                                  | 0.67        | OS9          | 87.9                                  | 230                                   | 2.62        |
| PFKL         | 45.8                                  | 20.8                                  | 0.45        | PDCD6IP      | 160.2                                 | 189.9                                 | 1.19        | PANK4        | 192.7                                 | 66.2                                  | 0.34        | OS9          | 119.2                                 | 435                                   | 3.65        |
| PFKFB3       | 465.4                                 | 58.1                                  | 0.12        | PDCD6        | 148.7                                 | 321.3                                 | 2.16        | PALM3        | 100.2                                 | 336.9                                 | 3.36        | ORMDL2       | 56.7                                  | 391.8                                 | 6.91        |
| PFKFB2       | 71.8                                  | 26.1                                  | 0.36        | PDCD5        | 367.2                                 | 77                                    | 0.21        | PALM         | 13.9                                  | 49.9                                  | 3.59        | ORM2         | 4.7                                   | 11.1                                  | 2.36        |
| PFDN6        | 204.6                                 | 32.1                                  | 0.16        | PDCD4        | 186.5                                 | 64.3                                  | 0.34        | PALLD        | 16.7                                  | 7.1                                   | 0.43        | ORM1         | 2.7                                   | 3.2                                   | 1.19        |
| PFDN2        | 228.4                                 | 44.9                                  | 0.20        | PDCD11       | 188.7                                 | 127.9                                 | 0.68        | PAK4         | 553.5                                 | 450.7                                 | 0.81        | ORC4         | 114.4                                 | 166.5                                 | 1.46        |
| PFAS         | 301.3                                 | 79.1                                  | 0.26        | PDCD10       | 198.4                                 | 302.6                                 | 1.53        | PAK2         | 267.2                                 | 101.2                                 | 0.38        | OR1M1        | 136.8                                 | 38.2                                  | 0.28        |
| PEX6         | 154.6                                 | 157.1                                 | 1.02        | PDAP1        | 187                                   | 26.5                                  | 0.14        | PAK1         | 127.3                                 | 50                                    | 0.39        | OPTN         | 203.1                                 | 82                                    | 0.40        |
| PEX5         | 79.7                                  | 57.2                                  | 0.72        | PCYT2        | 117.8                                 | 37                                    | 0.31        | PAIP1        | 212.4                                 | 64.5                                  | 0.30        | OPLAH        | 191.6                                 | 59.9                                  | 0.31        |
| PEX3         | 135.9                                 | 172                                   | 1.27        | PCYT1A       | 178.4                                 | 131.8                                 | 0.74        | PAICS        | 306.8                                 | 64.8                                  | 0.21        | OPA3         | 47                                    | 234                                   | 4.98        |
| PEX14        | 146.8                                 | 351.5                                 | 2.39        | PCYOX1       | 99.5                                  | 402.7                                 | 4.05        | PAH          | 12.7                                  | 37.4                                  | 2.94        | OPA1         | 72                                    | 172.8                                 | 2.40        |
| PEX11B       | 178.1                                 | 418.8                                 | 2.35        | PCTP         | 109.3                                 | 54.6                                  | 0.50        | PAFAH2       | 72.4                                  | 95                                    | 1.31        | OMA1         | 78.2                                  | 237.8                                 | 3.04        |
| PES1         | 339                                   | 361.5                                 | 1.07        | PCNA         | 560.7                                 | 100.6                                 | 0.18        | PAFAH1B3     | 106.6                                 | 44.4                                  | 0.42        | OLA1         | 292.4                                 | 59.2                                  | 0.20        |
| PEPD         | 56.9                                  | 11.9                                  | 0.21        | PCMT1        | 154.2                                 | 51.6                                  | 0.33        | PAFAH1B2     | 259.3                                 | 57.3                                  | 0.22        | OGT          | 141                                   | 64.1                                  | 0.45        |
| PELP1        | 191.6                                 | 188.1                                 | 0.98        | PCM1         | 74.8                                  | 104.1                                 | 1.39        | PAFAH1B1     | 140.3                                 | 70.2                                  | 0.50        | OGN          | 7                                     | 6.4                                   | 0.91        |
| PELO         | 120.8                                 | 46.4                                  | 0.38        | PCK2         | 11.7                                  | 1.8                                   | 0.15        | PAF1         | 141.3                                 | 57.9                                  | 0.41        | OGFR         | 221.2                                 | 57.5                                  | 0.26        |
| PECR         | 97                                    | 13.9                                  | 0.14        | PCK1         | 20.7                                  | 5.7                                   | 0.28        | PADI2        | 198.2                                 | 127.9                                 | 0.65        | OGDHL        | 35.6                                  | 10.4                                  | 0.29        |
| PECAM1       | 14.9                                  | 59.5                                  | 3.99        | PCIF1        | 84.4                                  | 20.1                                  | 0.24        | PACSN3       | 131.2                                 | 336.9                                 | 2.57        | OGDH         | 75.4                                  | 18.7                                  | 0.25        |
| PEBP1        | 79.3                                  | 15.8                                  | 0.20        | PCID2        | 121.5                                 | 49.8                                  | 0.41        | PACSN2       | 142.9                                 | 98.8                                  | 0.69        | OGA          | 81.6                                  | 17.9                                  | 0.22        |
| PEA15        | 157.1                                 | 39.6                                  | 0.25        | PCHGB6       | 143.1                                 | 1790.8                                | 12.51       | PACCI        | 44.7                                  | 139.3                                 | 3.12        | ODR4         | 68.1                                  | 257.7                                 | 3.78        |
| PDZK1IP1     | 31.3                                  | 392.9                                 | 12.55       | PCHD1        | 47.7                                  | 67.2                                  | 1.41        | PABPN1       | 134.9                                 | 81.1                                  | 0.60        | OCLN         | 75.2                                  | 497                                   | 6.61        |
| PDZK1        | 57.2                                  | 141.2                                 | 2.47        | PCCB         | 82.4                                  | 14.1                                  | 0.17        | PABPC4       | 352.1                                 | 147.3                                 | 0.42        | OClAD2       | 153.5                                 | 565.3                                 | 3.68        |
| PDZD8        | 102.1                                 | 147.2                                 | 1.44        | PCCA         | 85.1                                  | 10.4                                  | 0.12        | PABPC1       | 217.3                                 | 95.7                                  | 0.44        | OClAD1       | 110.3                                 | 361.8                                 | 3.28        |
| PDZD11       | 152.4                                 | 322.7                                 | 2.12        | PCBP2        | 167.6                                 | 90.9                                  | 0.54        | PA2G4        | 245                                   | 45.4                                  | 0.19        | OBSL1        | 99.6                                  | 134.7                                 | 1.35        |
| PDXP         | 133.6                                 | 141.3                                 | 1.06        | PCBP1        | 148.1                                 | 74.1                                  | 0.50        | P4HTM        | 203                                   | 224.1                                 | 1.10        | OAT          | 90.9                                  | 22.6                                  | 0.25        |

Values are expressed as % of protein abundance in TL of human kidney cortex 1.

**Supplemental table 5 (Continued):**

| Protein name | 3D RPTEC Spheroid_Lot.664995_day12_TL | 3D RPTEC Spheroid_Lot.664995_day12_PM | PW/TL ratio | Protein name | 3D RPTEC Spheroid_Lot.664995_day12_TL | 3D RPTEC Spheroid_Lot.664995_day12_PM | PW/TL ratio | Protein name | 3D RPTEC Spheroid_Lot.664995_day12_TL | 3D RPTEC Spheroid_Lot.664995_day12_PM | PW/TL ratio | Protein name | 3D RPTEC Spheroid_Lot.664995_day12_TL | 3D RPTEC Spheroid_Lot.664995_day12_PM | PW/TL ratio |
|--------------|---------------------------------------|---------------------------------------|-------------|--------------|---------------------------------------|---------------------------------------|-------------|--------------|---------------------------------------|---------------------------------------|-------------|--------------|---------------------------------------|---------------------------------------|-------------|
| OAS2         | 0.1                                   | 13.3                                  | 133.00      | NSFL1C       | 184.6                                 | 30.7                                  | 0.17        | NME1         | 596.7                                 | 205.4                                 | 0.34        | NDUFV3       | 39.7                                  | 167.3                                 | 4.21        |
| OARD1        | 134.5                                 | 37                                    | 0.28        | NSF          | 101.2                                 | 272.9                                 | 2.70        | NMD3         | 156.6                                 | 109.3                                 | 0.70        | NDUFV3       | 178.1                                 | 239.5                                 | 1.34        |
| NXF1         | 108.8                                 | 82.3                                  | 0.76        | NSDHL        | 238.3                                 | 884.3                                 | 3.71        | NLRX1        | 89.7                                  | 257.7                                 | 2.87        | NDUFV2       | 48.6                                  | 115.5                                 | 2.38        |
| NUTF2        | 169.4                                 | 36.9                                  | 0.22        | NSA2         | 141.1                                 | 102.3                                 | 0.73        | NLN          | 234.6                                 | 54.1                                  | 0.23        | NDUFV1       | 44.1                                  | 106.8                                 | 2.42        |
| NUP98        | 173                                   | 77.9                                  | 0.45        | NRP1         | 103.9                                 | 514.8                                 | 4.95        | NLE1         | 106.1                                 | 124.8                                 | 1.18        | NDUFS8       | 55.2                                  | 239.2                                 | 4.33        |
| NUP93        | 147.1                                 | 101.5                                 | 0.69        | NRIP2        | 0.1                                   | 4.5                                   | 45.00       | NKIRAS2      | 152.7                                 | 67.8                                  | 0.44        | NDUFS7       | 56.3                                  | 182.3                                 | 3.24        |
| NUP88        | 184.9                                 | 63.4                                  | 0.34        | NRDC         | 335.9                                 | 96.5                                  | 0.29        | NIT2         | 150.9                                 | 31                                    | 0.21        | NDUFS6       | 25                                    | 115.3                                 | 4.61        |
| NUP62        | 111.6                                 | 33.6                                  | 0.30        | NRCAM        | 649.6                                 | 783.5                                 | 1.21        | NIT1         | 111.9                                 | 29.5                                  | 0.26        | NDUFS5       | 50.1                                  | 192.8                                 | 3.85        |
| NUP54        | 157.8                                 | 93.3                                  | 0.59        | NRBP2        | 413.2                                 | 156.9                                 | 0.38        | NIPSNAP3     | 63.6                                  | 11.5                                  | 0.18        | NDUFS4       | 33.6                                  | 120.7                                 | 3.59        |
| NUP50        | 198.6                                 | 66.6                                  | 0.34        | NRBP1        | 57.8                                  | 16.9                                  | 0.29        | NIPSNAP2     | 149.3                                 | 13.4                                  | 0.09        | NDUFS3       | 56.8                                  | 174.7                                 | 3.08        |
| NUP37        | 132.1                                 | 24.6                                  | 0.19        | NR2F2        | 66.7                                  | 19.3                                  | 0.29        | NIPSNAP1     | 82.8                                  | 6                                     | 0.07        | NDUFS2       | 63                                    | 141.5                                 | 2.25        |
| NUP35        | 254.7                                 | 157.3                                 | 0.62        | NR2C2AP      | 282.4                                 | 49                                    | 0.17        | NIPBL        | 206.8                                 | 84.9                                  | 0.41        | NDUFS1       | 49.6                                  | 111.3                                 | 2.24        |
| NUP214       | 216.1                                 | 101                                   | 0.47        | NPTN         | 114.7                                 | 735.8                                 | 6.41        | NIP7         | 194.6                                 | 134.7                                 | 0.69        | NDUFC2       | 41.7                                  | 163.8                                 | 3.93        |
| NUP210       | 90.9                                  | 134.5                                 | 1.48        | NPR1         | 177.6                                 | 1090.3                                | 6.14        | NINJ1        | 61.9                                  | 277.9                                 | 4.49        | NDUFB9       | 35                                    | 111.8                                 | 3.19        |
| NUP205       | 93                                    | 61.1                                  | 0.66        | NPNT         | 1.4                                   | 0.1                                   | 0.07        | NIFK         | 232.2                                 | 282.7                                 | 1.22        | NDUFB8       | 24.5                                  | 127.8                                 | 5.22        |
| NUP188       | 98.2                                  | 99.8                                  | 1.02        | NPM1         | 295.7                                 | 34.6                                  | 0.12        | NIF3L1       | 122.4                                 | 23.8                                  | 0.19        | NDUFB7       | 37.3                                  | 137.5                                 | 3.69        |
| NUP160       | 104.5                                 | 67.2                                  | 0.64        | NPLOC4       | 156.3                                 | 38.7                                  | 0.25        | NID2         | 20.5                                  | 3.8                                   | 0.19        | NDUFB6       | 48.4                                  | 151.4                                 | 3.13        |
| NUP155       | 100.9                                 | 73.2                                  | 0.73        | NPL          | 12.1                                  | 6                                     | 0.50        | NID1         | 6.8                                   | 3.7                                   | 0.54        | NDUFB5       | 55.3                                  | 162.4                                 | 2.94        |
| NUP133       | 93.7                                  | 92.6                                  | 0.99        | NPHS2        | 24.5                                  | 104.2                                 | 4.25        | NIBAN2       | 332.7                                 | 326.7                                 | 0.98        | NDUFB4       | 34.8                                  | 146.2                                 | 4.20        |
| NUP107       | 104                                   | 98.7                                  | 0.95        | NPHS1        | 6.5                                   | 6.2                                   | 0.95        | NIBAN1       | 261                                   | 354.6                                 | 1.36        | NDUFB3       | 35.6                                  | 116.9                                 | 3.28        |
| NUMB         | 113.7                                 | 99.4                                  | 0.87        | NPPEPPS      | 268.3                                 | 86.4                                  | 0.32        | NIF5         | 356.5                                 | 1522.8                                | 4.27        | NDUFB11      | 41.5                                  | 146.6                                 | 3.53        |
| NUMA1        | 71.3                                  | 34.2                                  | 0.48        | NPEPL1       | 208.7                                 | 30.1                                  | 0.14        | NHLRC2       | 153.6                                 | 55                                    | 0.36        | NDUFB10      | 44.7                                  | 138.2                                 | 3.09        |
| NUFIP2       | 321.4                                 | 174.3                                 | 0.54        | NPC2         | 89.6                                  | 30.9                                  | 0.34        | NGLY1        | 123.9                                 | 90                                    | 0.73        | NDUFAF7      | 181.1                                 | 25.8                                  | 0.14        |
| NUDT9        | 224.8                                 | 46.8                                  | 0.21        | NPC1         | 666.2                                 | 4789.4                                | 7.19        | NGFN         | 53.3                                  | 38.3                                  | 0.72        | NDUFAF6      | 124                                   | 342.8                                 | 2.76        |
| NUDT8        | 131                                   | 40.6                                  | 0.31        | NOTCH2       | 332.2                                 | 2694.2                                | 8.11        | NFYC         | 66.6                                  | 21.4                                  | 0.32        | NDUFAF5      | 147.5                                 | 26.7                                  | 0.18        |
| NUDT6        | 46.9                                  | 9.3                                   | 0.20        | NOSTRIN      | 168.3                                 | 139.9                                 | 0.83        | NFXL1        | 142.1                                 | 318.7                                 | 2.24        | NDUFAF4      | 173.5                                 | 511.9                                 | 2.95        |
| NUDT5        | 244                                   | 58                                    | 0.24        | NOSIP        | 178.3                                 | 33.8                                  | 0.19        | NFU1         | 99.9                                  | 8.3                                   | 0.08        | NDUFAF3      | 191.7                                 | 453.5                                 | 2.37        |
| NUDT4        | 296.4                                 | 59.1                                  | 0.20        | NOP58        | 135                                   | 76.6                                  | 0.57        | NFS1         | 133.5                                 | 8.2                                   | 0.06        | NDUFAF2      | 147.8                                 | 401.2                                 | 2.71        |
| NUDT21       | 131.2                                 | 356.4                                 | 2.72        | NOP56        | 145.8                                 | 110.2                                 | 0.76        | NFKBIE       | 119.8                                 | 49                                    | 0.41        | NDUFAF1      | 171.8                                 | 617                                   | 3.59        |
| NUDT2        | 199.7                                 | 57.5                                  | 0.29        | NOP2         | 245.6                                 | 262.9                                 | 1.07        | NFKB2        | 208.8                                 | 126.1                                 | 0.60        | NDUFA1       | 65.6                                  | 41.4                                  | 0.63        |
| NUDT19       | 132.7                                 | 10.5                                  | 0.08        | NONO         | 158.1                                 | 20                                    | 0.13        | NFKB1        | 106.6                                 | 32.6                                  | 0.31        | NDUFA9       | 40.1                                  | 111.8                                 | 2.79        |
| NUDT12       | 70.1                                  | 21.4                                  | 0.31        | NOMO2        | 77.2                                  | 247.8                                 | 3.21        | NFIA         | 61.1                                  | 8.5                                   | 0.14        | NDUFA8       | 46.4                                  | 191.5                                 | 4.13        |
| NUDT1        | 237.1                                 | 0.1                                   | 0.00        | NOMO1        | 95                                    | 324                                   | 3.41        | NF2          | 147.8                                 | 249.4                                 | 1.69        | NDUFA7       | 40.4                                  | 170.8                                 | 4.23        |
| NUDCD2       | 116.5                                 | 37.4                                  | 0.32        | NOLC1        | 822.3                                 | 88.7                                  | 0.11        | NF1          | 116                                   | 147.3                                 | 1.27        | NDUFA6       | 52.5                                  | 133.1                                 | 2.54        |
| NUDCD1       | 56.5                                  | 13.5                                  | 0.24        | NOL9         | 123.5                                 | 155.4                                 | 1.26        | NEU1         | 180.9                                 | 113                                   | 0.62        | NDUFA5       | 58                                    | 124.5                                 | 2.15        |
| NUDC         | 268.7                                 | 110.4                                 | 0.41        | NOL6         | 373.4                                 | 229.9                                 | 0.62        | NES          | 9.7                                   | 6.3                                   | 0.65        | NDUFA4       | 36                                    | 143.4                                 | 3.98        |
| NUCKS1       | 1125.5                                | 0.1                                   | 0.00        | NOL11        | 140.6                                 | 202.6                                 | 1.44        | NEO1         | 97.9                                  | 98.6                                  | 1.01        | NDUFA3       | 29.2                                  | 210.3                                 | 7.20        |
| NUCB2        | 65.2                                  | 138.3                                 | 2.12        | NOL10        | 220.6                                 | 65.4                                  | 0.30        | NENF         | 43.7                                  | 32.9                                  | 0.75        | NDUFA2       | 52.7                                  | 120.4                                 | 2.28        |
| NUCB1        | 85.4                                  | 111.9                                 | 1.31        | NOC4L        | 212.7                                 | 355.3                                 | 1.67        | NEMF         | 103.7                                 | 84.4                                  | 0.81        | NDUFA13      | 50.8                                  | 170.9                                 | 3.36        |
| NUBPL        | 55.7                                  | 15.8                                  | 0.28        | NOC3L        | 249                                   | 252.8                                 | 1.02        | NELFCD       | 118.8                                 | 92.4                                  | 0.78        | NDUFA12      | 35                                    | 107.6                                 | 3.07        |
| NUBP2        | 183.6                                 | 66.1                                  | 0.36        | NOC2L        | 163.8                                 | 130                                   | 0.79        | NELFB        | 111.2                                 | 65.1                                  | 0.59        | NDUFA11      | 28.8                                  | 124.2                                 | 4.31        |
| NUBP1        | 160.8                                 | 54.4                                  | 0.34        | NOA1         | 185                                   | 25                                    | 0.14        | NEK9         | 112.3                                 | 77                                    | 0.69        | NDUFA10      | 44.4                                  | 133.8                                 | 3.01        |
| NTN4         | 29.5                                  | 7.6                                   | 0.26        | NNT          | 129.9                                 | 501.9                                 | 3.86        | NEK7         | 84.4                                  | 44.3                                  | 0.52        | NDUFA1       | 36.4                                  | 184.2                                 | 5.06        |
| NTMT1        | 363.7                                 | 87.7                                  | 0.24        | NNMT         | 1656.6                                | 333.8                                 | 0.20        | NEGR1        | 18.3                                  | 18                                    | 0.98        | NDST1        | 16.2                                  | 11.9                                  | 0.73        |
| NT5E         | 176.4                                 | 803.3                                 | 4.55        | NMT1         | 221.1                                 | 38.7                                  | 0.18        | NEDD4L       | 114.1                                 | 190.8                                 | 1.67        | NDRG2        | 9.6                                   | 15.3                                  | 1.59        |
| NTSDC1       | 155.2                                 | 31.7                                  | 0.20        | NMRAL1       | 71.7                                  | 34.3                                  | 0.48        | NEDD4        | 101.3                                 | 224.3                                 | 2.21        | NDRG1        | 45.6                                  | 235.7                                 | 5.17        |
| NTSC3A       | 129.5                                 | 118.1                                 | 0.91        | NMNAT3       | 58.6                                  | 34.7                                  | 0.59        | NECTIN3      | 94.1                                  | 376.6                                 | 4.00        | NDP1P1       | 272.7                                 | 2651.3                                | 9.72        |
| NTSC2        | 108.1                                 | 22.7                                  | 0.21        | NMNAT1       | 122.4                                 | 15.2                                  | 0.12        | NECTIN2      | 67.8                                  | 243.8                                 | 3.60        | NDC1         | 66.5                                  | 162.8                                 | 2.45        |
| NTSC         | 139.5                                 | 35.5                                  | 0.25        | NME3         | 48                                    | 180.8                                 | 3.77        | NECAP2       | 102.9                                 | 104.8                                 | 1.02        | NCSTN        | 395.5                                 | 2233.5                                | 5.65        |
| NSUN2        | 332.7                                 | 55.2                                  | 0.17        | NME2         | 490.8                                 | 178.2                                 | 0.36        | NEBL         | 9.1                                   | 17.3                                  | 1.90        | NCOA7        | 124.1                                 | 70.9                                  | 0.57        |

Values are expressed as % of protein abundance in TL of human kidney cortex 1.

## Supplemental table 5 (Continued):

| Protein name | 3D RPTEC Spheroid_Lot.664995_day12_TL | 3D RPTEC Spheroid_Lot.664995_day12_PM | PM/TL ratio | Protein name | 3D RPTEC Spheroid_Lot.664995_day12_TL | 3D RPTEC Spheroid_Lot.664995_day12_PM | PM/TL ratio | Protein name | 3D RPTEC Spheroid_Lot.664995_day12_TL | 3D RPTEC Spheroid_Lot.664995_day12_PM | PM/TL ratio | Protein name | 3D RPTEC Spheroid_Lot.664995_day12_TL | 3D RPTEC Spheroid_Lot.664995_day12_PM | PM/TL ratio |
|--------------|---------------------------------------|---------------------------------------|-------------|--------------|---------------------------------------|---------------------------------------|-------------|--------------|---------------------------------------|---------------------------------------|-------------|--------------|---------------------------------------|---------------------------------------|-------------|
| NCOA5        | 94.5                                  | 10.4                                  | 0.11        | MYO7B        | 40.5                                  | 46.6                                  | 1.15        | MTIF3        | 117.4                                 | 16.1                                  | 0.14        | MRPS14       | 199.5                                 | 162.7                                 | 0.82        |
| NCLN         | 109.7                                 | 345.1                                 | 3.15        | MYO6         | 90.5                                  | 72.7                                  | 0.80        | MTIF2        | 129.2                                 | 17.8                                  | 0.14        | MRPS10       | 178.4                                 | 68.1                                  | 0.38        |
| NCL          | 241.9                                 | 144.7                                 | 0.60        | MYO5B        | 133.1                                 | 211.1                                 | 1.59        | MTHFS        | 85.7                                  | 13                                    | 0.15        | MRPL9        | 239.7                                 | 273.3                                 | 1.14        |
| NCKAP1       | 109.1                                 | 171.6                                 | 1.57        | MYO5A        | 93.5                                  | 97.5                                  | 1.04        | MTHFR        | 198.3                                 | 62.2                                  | 0.31        | MRPL57       | 211.6                                 | 216.1                                 | 1.02        |
| NCK2         | 85.8                                  | 83.9                                  | 0.98        | MYO1E        | 200.1                                 | 106.1                                 | 0.53        | MTHFD1L      | 324                                   | 47                                    | 0.15        | MRPL54       | 571.7                                 | 452.1                                 | 0.79        |
| NCK1         | 126.5                                 | 110.1                                 | 0.87        | MYO1D        | 73.7                                  | 169.4                                 | 2.30        | MTHFD1       | 139.6                                 | 36.9                                  | 0.26        | MRPL52       | 247.4                                 | 244.5                                 | 0.99        |
| NCEH1        | 244.5                                 | 1001.9                                | 4.10        | MYO1C        | 89.7                                  | 265.6                                 | 2.96        | MTG1         | 118.1                                 | 34.8                                  | 0.29        | MRPL51       | 196.5                                 | 243.7                                 | 1.24        |
| NCBP3        | 165.2                                 | 209.6                                 | 1.27        | MYO1B        | 66.9                                  | 184.8                                 | 2.76        | MTFR1L       | 82.4                                  | 117.2                                 | 1.42        | MRPL49       | 213.1                                 | 236                                   | 1.11        |
| NCBP2        | 230.5                                 | 47                                    | 0.20        | MYO18A       | 88.5                                  | 52                                    | 0.59        | MTFP1        | 132.8                                 | 566.2                                 | 4.26        | MRPL48       | 222                                   | 62.5                                  | 0.28        |
| NCBP1        | 170.7                                 | 30.5                                  | 0.18        | MYO10        | 170.3                                 | 438.3                                 | 2.57        | MTDH         | 244.2                                 | 512.6                                 | 2.10        | MRPL47       | 243.8                                 | 297.9                                 | 1.22        |
| NCAPD2       | 390.2                                 | 247.8                                 | 0.64        | MYLK         | 35.6                                  | 29                                    | 0.81        | MT-CO3       | 39.2                                  | 125.2                                 | 3.19        | MRPL46       | 244.1                                 | 61.4                                  | 0.25        |
| NCAM1        | 34.1                                  | 27.3                                  | 0.80        | MYL9         | 58                                    | 52.8                                  | 0.91        | MT-CO2       | 37.3                                  | 146.6                                 | 3.93        | MRPL45       | 207.4                                 | 237.4                                 | 1.14        |
| NCALD        | 89                                    | 122.6                                 | 1.38        | MYL6         | 57.4                                  | 23.3                                  | 0.41        | MT-CO1       | 41                                    | 132.6                                 | 3.23        | MRPL44       | 209.2                                 | 181.9                                 | 0.87        |
| NBEAL2       | 141.3                                 | 82.9                                  | 0.59        | MYL12B       | 73.9                                  | 66.5                                  | 0.90        | MTCH2        | 60.9                                  | 235.6                                 | 3.87        | MRPL43       | 252.2                                 | 257.2                                 | 1.02        |
| NBEAL1       | 119.4                                 | 59                                    | 0.49        | MYH9         | 82.6                                  | 40.1                                  | 0.49        | MTCH1        | 55.8                                  | 161                                   | 2.89        | MRPL41       | 259.9                                 | 251.6                                 | 0.97        |
| NBAS         | 114                                   | 229.4                                 | 2.01        | MYH14        | 18.9                                  | 15.6                                  | 0.83        | MT-ATP6      | 23.3                                  | 66.7                                  | 2.86        | MRPL40       | 296.8                                 | 81.9                                  | 0.28        |
| NAXE         | 135.4                                 | 28.6                                  | 0.21        | MYH11        | 8.7                                   | 10.6                                  | 1.22        | MTARC2       | 12.7                                  | 27.8                                  | 2.19        | MRPL4        | 233.3                                 | 226.2                                 | 0.97        |
| NAXD         | 53.9                                  | 22.2                                  | 0.41        | MYH10        | 35.7                                  | 18.9                                  | 0.53        | MTARC1       | 87.9                                  | 260.3                                 | 2.96        | MRPL39       | 188.9                                 | 181.5                                 | 0.96        |
| NAT8         | 17                                    | 73.8                                  | 4.34        | MYEF2        | 168.8                                 | 43.7                                  | 0.26        | MTAP         | 199.9                                 | 58.3                                  | 0.29        | MRPL38       | 124.3                                 | 106.8                                 | 0.86        |
| NAT10        | 142.1                                 | 86.1                                  | 0.61        | MYDGF        | 189.9                                 | 114.7                                 | 0.60        | MTA2         | 162.7                                 | 69.4                                  | 0.43        | MRPL37       | 258.7                                 | 249.9                                 | 0.97        |
| NAT1         | 125.1                                 | 27.9                                  | 0.22        | MYD88        | 98                                    | 179.6                                 | 1.83        | MTA1         | 78.3                                  | 15.5                                  | 0.20        | MRPL32       | 214.3                                 | 165.5                                 | 0.78        |
| NASP         | 208.2                                 | 42.4                                  | 0.20        | MYCBP2       | 134.1                                 | 199.6                                 | 1.49        | MT1H         | 71.9                                  | 17.7                                  | 0.25        | MRPL30       | 200.7                                 | 170.7                                 | 0.85        |
| NARS2        | 66.7                                  | 0.1                                   | 0.00        | MYBBP1A      | 160.3                                 | 195.1                                 | 1.22        | MT1G         | 56                                    | 16.2                                  | 0.29        | MRPL3        | 364.2                                 | 441.8                                 | 1.21        |
| NARS1        | 238.3                                 | 61.8                                  | 0.26        | MYADM        | 59.8                                  | 302.6                                 | 5.06        | MSTO1        | 178.5                                 | 69                                    | 0.39        | MRPL28       | 156.6                                 | 146.9                                 | 0.94        |
| NAPSA        | 17.8                                  | 33.1                                  | 1.86        | MX1          | 20.5                                  | 11.2                                  | 0.55        | MSRA         | 23.2                                  | 15.2                                  | 0.66        | MRPL27       | 261.8                                 | 340.8                                 | 1.30        |
| NAPRT        | 73                                    | 16.3                                  | 0.22        | MVP          | 209.9                                 | 689.2                                 | 3.28        | MSN          | 149.9                                 | 149.8                                 | 1.00        | MRPL24       | 249.8                                 | 255.6                                 | 1.02        |
| NAPG         | 103.3                                 | 344.7                                 | 3.34        | MVK          | 287.1                                 | 73.1                                  | 0.25        | MSI2         | 161.2                                 | 85                                    | 0.53        | MRPL22       | 219.3                                 | 190.5                                 | 0.87        |
| NAPEPLD      | 129.8                                 | 620                                   | 4.78        | MVD          | 310.1                                 | 154                                   | 0.50        | MSH6         | 81.4                                  | 57.1                                  | 0.70        | MRPL21       | 223.3                                 | 118.8                                 | 0.53        |
| NAPA         | 131.6                                 | 377.9                                 | 2.87        | MVB12A       | 166                                   | 407                                   | 2.45        | MSH5         | 345.2                                 | 587.8                                 | 1.70        | MRPL20       | 251.9                                 | 289.9                                 | 1.15        |
| NAP1L4       | 134.4                                 | 26.7                                  | 0.20        | MUL1         | 69                                    | 231.9                                 | 3.36        | MSH2         | 175.6                                 | 51.2                                  | 0.29        | MRPL2        | 200.5                                 | 203.4                                 | 1.01        |
| NAP1L1       | 181.9                                 | 50.3                                  | 0.28        | MUC13        | 25.7                                  | 104.8                                 | 4.08        | MRTO4        | 187.4                                 | 90.3                                  | 0.48        | MRPL19       | 169.8                                 | 166.3                                 | 0.98        |
| NANS         | 174.7                                 | 21.6                                  | 0.12        | MUC1         | 152.1                                 | 492.5                                 | 3.24        | MRS2         | 226.3                                 | 685                                   | 3.03        | MRPL17       | 267.7                                 | 278.1                                 | 1.04        |
| NAMPT        | 755.5                                 | 196.6                                 | 0.26        | MTX3         | 59.1                                  | 159.5                                 | 2.70        | MRPS9        | 155.6                                 | 96.2                                  | 0.62        | MRPL15       | 238.9                                 | 263                                   | 1.10        |
| NAGLU        | 136.4                                 | 114.9                                 | 0.84        | MTX2         | 98.5                                  | 295.1                                 | 3.00        | MRPS5        | 342.5                                 | 152.8                                 | 0.45        | MRPL13       | 199                                   | 195                                   | 0.98        |
| NAGK         | 145.8                                 | 25.2                                  | 0.17        | MTX1         | 98.7                                  | 274                                   | 2.78        | MRPS36       | 91.9                                  | 19.8                                  | 0.22        | MRPL12       | 173.2                                 | 68.7                                  | 0.40        |
| NAGA         | 102.2                                 | 60.3                                  | 0.59        | MTTP         | 23.6                                  | 11.4                                  | 0.48        | MRPS35       | 181                                   | 54.7                                  | 0.30        | MRPL11       | 221.8                                 | 170.6                                 | 0.77        |
| NAE1         | 288.1                                 | 68.8                                  | 0.24        | MTREX        | 136.2                                 | 53.1                                  | 0.39        | MRPS34       | 236.3                                 | 100.5                                 | 0.43        | MRPL10       | 224.7                                 | 88.9                                  | 0.40        |
| NADSYN1      | 354.3                                 | 108.1                                 | 0.31        | MTR          | 150.6                                 | 33.9                                  | 0.23        | MRPS31       | 410.7                                 | 131                                   | 0.32        | MRPL1        | 206.7                                 | 158.4                                 | 0.77        |
| NADK2        | 85.6                                  | 16.3                                  | 0.19        | MTPN         | 248.4                                 | 39                                    | 0.16        | MRPS30       | 194                                   | 210.5                                 | 1.09        | MROH1        | 142.3                                 | 292.8                                 | 2.06        |
| NACA2        | 219.4                                 | 34.1                                  | 0.16        | MTPAP        | 91.2                                  | 27.9                                  | 0.31        | MRPS27       | 258.8                                 | 87.5                                  | 0.34        | MRI1         | 253.9                                 | 65                                    | 0.26        |
| NACA         | 254.3                                 | 36.7                                  | 0.14        | MTOR         | 133.7                                 | 203                                   | 1.52        | MRPS25       | 193.8                                 | 71                                    | 0.37        | MRE11        | 148.2                                 | 45.6                                  | 0.31        |
| NAA50        | 123.5                                 | 29                                    | 0.23        | MT-ND5       | 33.8                                  | 102.9                                 | 3.04        | MRPS24       | 162                                   | 95                                    | 0.59        | MRC2         | 43.8                                  | 45.1                                  | 1.03        |
| NAA40        | 180                                   | 140.6                                 | 0.78        | MT-ND4       | 21.1                                  | 110                                   | 5.21        | MRPS23       | 248.1                                 | 84.4                                  | 0.34        | MPZL1        | 8.7                                   | 9.2                                   | 1.06        |
| NAA35        | 239                                   | 116.8                                 | 0.49        | MT-ND2       | 52                                    | 150.7                                 | 2.90        | MRPS22       | 191.8                                 | 87.5                                  | 0.46        | MPZL1        | 130.3                                 | 651.8                                 | 5.00        |
| NAA25        | 271.1                                 | 41.7                                  | 0.15        | MT-ND1       | 31.4                                  | 115.7                                 | 3.68        | MRPS2        | 222.2                                 | 61.3                                  | 0.28        | MPV17        | 95.6                                  | 358.3                                 | 3.75        |
| NAA16        | 126.6                                 | 61.6                                  | 0.49        | MTMR9        | 119.9                                 | 61.1                                  | 0.51        | MRPS18C      | 189.8                                 | 38                                    | 0.20        | MPST         | 104.2                                 | 21.6                                  | 0.21        |
| NAA15        | 400.3                                 | 80.3                                  | 0.20        | MTMR6        | 122.6                                 | 78.3                                  | 0.64        | MRPS18B      | 143.4                                 | 67.1                                  | 0.47        | MPRI1        | 30.4                                  | 18.7                                  | 0.62        |
| NAA10        | 365.5                                 | 114.1                                 | 0.31        | MTMR12       | 410.5                                 | 136.8                                 | 0.33        | MRPS17       | 239.3                                 | 86.8                                  | 0.36        | MPP7         | 113.9                                 | 420                                   | 3.69        |
| MYORG        | 187.9                                 | 954.5                                 | 5.08        | MTMR10       | 98.6                                  | 70.5                                  | 0.72        | MRPS16       | 224.3                                 | 84.3                                  | 0.38        | MPP6         | 184.6                                 | 725.5                                 | 3.93        |
| MYOF         | 243                                   | 1611.8                                | 6.63        | MTMR1        | 156.5                                 | 89.6                                  | 0.57        | MRPS15       | 223.7                                 | 137.3                                 | 0.61        | MPP5         | 79.4                                  | 463.2                                 | 5.83        |

Values are expressed as % of protein abundance in TL of human kidney cortex 1.

## Supplemental table 5 (Continued):

| Protein name | 3D RPTEC Spheroid_Lot.664995_day12.TL | 3D RPTEC Spheroid_Lot.664995_day12.PM | PM/TL ratio | Protein name | 3D RPTEC Spheroid_Lot.664995_day12.TL | 3D RPTEC Spheroid_Lot.664995_day12.PM | PM/TL ratio | Protein name | 3D RPTEC Spheroid_Lot.664995_day12.TL | 3D RPTEC Spheroid_Lot.664995_day12.PM | PM/TL ratio | Protein name | 3D RPTEC Spheroid_Lot.664995_day12.TL | 3D RPTEC Spheroid_Lot.664995_day12.PM | PM/TL ratio |
|--------------|---------------------------------------|---------------------------------------|-------------|--------------|---------------------------------------|---------------------------------------|-------------|--------------|---------------------------------------|---------------------------------------|-------------|--------------|---------------------------------------|---------------------------------------|-------------|
| MPP2         | 39.6                                  | 72.7                                  | 1.84        | MIA2         | 95.8                                  | 209.6                                 | 2.19        | MCAM         | 104.9                                 | 426.2                                 | 4.06        | MANIA1       | 68.6                                  | 240                                   | 3.50        |
| MPP1         | 65.7                                  | 152                                   | 2.31        | MGST3        | 67.6                                  | 179                                   | 2.65        | MBOAT7       | 94.1                                  | 357.1                                 | 3.79        | MAL1         | 126.8                                 | 38                                    | 0.30        |
| MPI          | 171.7                                 | 54.5                                  | 0.32        | MGST1        | 107                                   | 418.5                                 | 3.91        | MBNL1        | 135.6                                 | 20.1                                  | 0.15        | MAK16        | 157.2                                 | 163.1                                 | 1.04        |
| MPDZ         | 87.9                                  | 363.8                                 | 4.14        | MGRN1        | 220.8                                 | 1422.1                                | 6.44        | MBNL1        | 142.2                                 | 13.4                                  | 0.09        | MAIP1        | 100.2                                 | 180.3                                 | 1.80        |
| MPDU1        | 92.1                                  | 348.6                                 | 3.79        | MGME1        | 390.2                                 | 26.2                                  | 0.07        | MBLAC2       | 88.1                                  | 324.2                                 | 3.68        | MAGT1        | 114.1                                 | 182.7                                 | 1.60        |
| MPC2         | 83.6                                  | 278                                   | 3.33        | MGLL         | 123.9                                 | 126.6                                 | 1.02        | MAVS         | 672.7                                 | 1450.2                                | 2.16        | MAGO8        | 142.2                                 | 99.7                                  | 0.70        |
| MOXD1        | 11.3                                  | 21.8                                  | 1.93        | MGAT1        | 83.6                                  | 164.4                                 | 1.97        | MATR3        | 157.9                                 | 140.9                                 | 0.89        | MAG2         | 18.6                                  | 61.6                                  | 3.31        |
| MOV10        | 99.3                                  | 86.4                                  | 0.87        | MGARP        | 18.9                                  | 68.4                                  | 3.62        | MAT2B        | 145                                   | 46.6                                  | 0.32        | MAGED2       | 107.9                                 | 158                                   | 1.46        |
| MOSPD2       | 123.4                                 | 344.2                                 | 2.79        | MGAM         | 5.5                                   | 5.1                                   | 0.93        | MAT2A        | 164                                   | 49.2                                  | 0.30        | MACROH2A1    | 102.3                                 | 71.9                                  | 0.70        |
| MORC2        | 303.9                                 | 248.8                                 | 0.82        | MFSD10       | 56.2                                  | 184.7                                 | 3.29        | MAST2        | 52.4                                  | 140.5                                 | 2.68        | MACROD1      | 69.3                                  | 5.7                                   | 0.08        |
| MON2         | 92.6                                  | 108.7                                 | 1.17        | MFN2         | 58.7                                  | 158.5                                 | 2.70        | MARVELD3     | 130.2                                 | 985.1                                 | 7.57        | MACF1        | 120                                   | 78.1                                  | 0.65        |
| MOGS         | 110.6                                 | 302.5                                 | 2.74        | MFN1         | 88.8                                  | 325.1                                 | 3.66        | MARS1        | 164.7                                 | 74                                    | 0.45        | MACF1        | 88.3                                  | 98.2                                  | 1.11        |
| MOCS3        | 103.9                                 | 16.2                                  | 0.16        | MFGE8        | 87.4                                  | 337.4                                 | 3.86        | MARX2        | 156.9                                 | 170.1                                 | 1.08        | M6PR         | 88.3                                  | 420.4                                 | 4.76        |
| MOCS2        | 101.9                                 | 16.2                                  | 0.16        | MFF          | 94.5                                  | 344.1                                 | 3.64        | MARCKSL1     | 82.7                                  | 228.9                                 | 2.77        | LYRM4        | 154.4                                 | 3.5                                   | 0.02        |
| MOB4         | 154.7                                 | 32                                    | 0.21        | MFAP4        | 10                                    | 4.3                                   | 0.43        | MARCKS       | 86.7                                  | 230.3                                 | 2.66        | LYPLA1       | 162.5                                 | 58                                    | 0.36        |
| MOB2         | 116.8                                 | 59.2                                  | 0.51        | MFAP2        | 3.8                                   | 9.1                                   | 2.39        | MARCF6       | 129.7                                 | 326.1                                 | 2.51        | LYN          | 84.2                                  | 457.1                                 | 5.43        |
| MOB1B        | 136.8                                 | 100.8                                 | 0.74        | METTL7B      | 137.9                                 | 480.4                                 | 3.48        | MARCF5       | 130.6                                 | 342.4                                 | 2.62        | LY75         | 0.1                                   | 8.6                                   | 86.00       |
| MMUT         | 114.8                                 | 11                                    | 0.10        | METTL7A      | 52                                    | 215.9                                 | 4.15        | MAPT         | 18.1                                  | 0.1                                   | 0.01        | LXN          | 138.4                                 | 46.4                                  | 0.34        |
| MMRN2        | 3.4                                   | 6.3                                   | 1.85        | METTL3       | 211.1                                 | 52.6                                  | 0.25        | MAPT         | 13.1                                  | 64.5                                  | 4.92        | LUZP1        | 174                                   | 82.5                                  | 0.47        |
| MMP15        | 238.3                                 | 841.4                                 | 3.53        | METAP2       | 76.2                                  | 26.4                                  | 0.35        | MAPRE3       | 116.4                                 | 47.4                                  | 0.41        | LUM          | 1                                     | 1.3                                   | 1.30        |
| MMP14        | 860.2                                 | 5387.2                                | 6.26        | METAP1       | 219.7                                 | 47.8                                  | 0.22        | MAPRE2       | 159.6                                 | 67.7                                  | 0.42        | LUC7L3       | 151.1                                 | 22.4                                  | 0.15        |
| MMGT1        | 114.9                                 | 381.7                                 | 3.32        | MET          | 342                                   | 1846                                  | 5.40        | MAPRE1       | 198.5                                 | 85.4                                  | 0.43        | LUC7L2       | 137.2                                 | 8.4                                   | 0.06        |
| MME          | 22.7                                  | 102.4                                 | 4.51        | MESD         | 109.5                                 | 91.6                                  | 0.84        | MAPKAPK2     | 205.2                                 | 76.1                                  | 0.37        | LUC7L        | 165.1                                 | 2.5                                   | 0.02        |
| MMAB         | 159.4                                 | 11.5                                  | 0.07        | MEMO1        | 492.7                                 | 236.1                                 | 0.48        | MARX8        | 103.7                                 | 60.6                                  | 0.58        | LTN1         | 182.8                                 | 109.1                                 | 0.60        |
| MMAA         | 101                                   | 16                                    | 0.16        | MELTF        | 178.1                                 | 301.6                                 | 1.69        | MAPK3        | 57.5                                  | 35.7                                  | 0.62        | LTP1         | 2.7                                   | 0.5                                   | 0.19        |
| MLYCD        | 78.2                                  | 15.6                                  | 0.20        | MED24        | 122                                   | 86.7                                  | 0.71        | MAPK14       | 123.5                                 | 50.8                                  | 0.41        | LTA4H        | 160.8                                 | 44.3                                  | 0.28        |
| MLST8        | 139.8                                 | 172.6                                 | 1.23        | MED18        | 96.6                                  | 24                                    | 0.25        | MAPK1        | 111.6                                 | 36.8                                  | 0.33        | LSS          | 244.8                                 | 1069.9                                | 4.37        |
| MLKL         | 408.8                                 | 95.2                                  | 0.23        | MECR         | 119.4                                 | 3.2                                   | 0.03        | MAP7D1       | 486.7                                 | 322                                   | 0.66        | LSR          | 127.6                                 | 868.3                                 | 6.80        |
| MLH1         | 143                                   | 71.2                                  | 0.50        | MECP2        | 118.3                                 | 12.7                                  | 0.11        | MAP7         | 668.1                                 | 331.6                                 | 0.50        | LSM8         | 176.2                                 | 37.8                                  | 0.21        |
| MLEC         | 71.4                                  | 238.8                                 | 3.34        | MEAK7        | 206.2                                 | 873.5                                 | 4.24        | MAP4K4       | 288.9                                 | 570.2                                 | 1.97        | LSM4         | 205.6                                 | 33.4                                  | 0.16        |
| MKRN2        | 112.7                                 | 32.7                                  | 0.29        | ME3          | 128.3                                 | 79                                    | 0.62        | MAP4         | 520.1                                 | 40                                    | 0.08        | LSM2         | 209.6                                 | 99.9                                  | 0.48        |
| MKLN1        | 178.7                                 | 94.9                                  | 0.53        | ME2          | 247.2                                 | 14.6                                  | 0.06        | MAP3K7       | 144.1                                 | 108.8                                 | 0.76        | LSM14A       | 184.5                                 | 43                                    | 0.23        |
| MISP         | 68.8                                  | 89.9                                  | 1.31        | ME1          | 385.1                                 | 73.5                                  | 0.19        | MAP3K6       | 182.8                                 | 202.4                                 | 1.11        | LSM12        | 186.9                                 | 51.9                                  | 0.28        |
| MPEP         | 140.4                                 | 16.4                                  | 0.12        | MDN1         | 250.9                                 | 240.3                                 | 0.96        | MAP2K6       | 93.8                                  | 58.3                                  | 0.62        | LRSAM1       | 214.6                                 | 411.9                                 | 1.92        |
| MIOX         | 230.7                                 | 45.4                                  | 0.20        | MDH2         | 123.8                                 | 14.8                                  | 0.12        | MAP2K4       | 129.5                                 | 46.4                                  | 0.36        | LRRN4        | 163.1                                 | 492.4                                 | 3.02        |
| MIOS         | 143.7                                 | 170.1                                 | 1.18        | MDH1         | 174.7                                 | 31.4                                  | 0.18        | MAP2K3       | 108.7                                 | 54.9                                  | 0.51        | LRRK2        | 167.5                                 | 158.6                                 | 0.95        |
| MINPP1       | 97.1                                  | 61.9                                  | 0.64        | MCUR1        | 85.4                                  | 257.1                                 | 3.01        | MAP2K2       | 113.1                                 | 62.8                                  | 0.56        | LRRFIP2      | 155.6                                 | 29.5                                  | 0.19        |
| MINK1        | 159.1                                 | 285.2                                 | 1.79        | MCU          | 180.3                                 | 590.2                                 | 3.27        | MAP2K1       | 150.7                                 | 83.6                                  | 0.55        | LRRK8E       | 211.5                                 | 1026.6                                | 4.85        |
| MINDY3       | 258.5                                 | 89.9                                  | 0.35        | MCTS1        | 237.7                                 | 51.1                                  | 0.21        | MAP1S        | 135.5                                 | 95.6                                  | 0.71        | LRRK8D       | 79.9                                  | 478.7                                 | 5.99        |
| MINDY1       | 271.4                                 | 451.4                                 | 1.66        | MCMBP        | 295.5                                 | 39.6                                  | 0.13        | MAP1B        | 305.4                                 | 104.7                                 | 0.34        | LRRK8A       | 181.2                                 | 1385.4                                | 7.65        |
| MIER1        | 1426.4                                | 482.8                                 | 0.34        | MCM6         | 507.2                                 | 128                                   | 0.25        | MAP11        | 119.3                                 | 103.5                                 | 0.87        | LRRK59       | 142.5                                 | 456                                   | 3.20        |
| MIEF1        | 187.7                                 | 51.9                                  | 0.28        | MCM4         | 660.7                                 | 340.8                                 | 0.52        | MAOB         | 36                                    | 131.1                                 | 3.64        | LRRK57       | 96.8                                  | 199.2                                 | 2.06        |
| MICU2        | 331.1                                 | 468.2                                 | 1.41        | MCM3AP       | 95.2                                  | 73.1                                  | 0.77        | MAOA         | 93.1                                  | 382.8                                 | 4.11        | LRRK47       | 142.4                                 | 50.1                                  | 0.35        |
| MICU1        | 324.7                                 | 618.8                                 | 1.91        | MCM3         | 439.5                                 | 196.4                                 | 0.45        | MANF         | 182.4                                 | 132.5                                 | 0.73        | LRRK41       | 139.8                                 | 69.1                                  | 0.49        |
| MICOS13      | 77.9                                  | 180.7                                 | 2.32        | MCM2         | 1407.4                                | 1443.2                                | 1.03        | MANBAL       | 142.7                                 | 1166.1                                | 8.17        | LRRK40       | 188.5                                 | 125.7                                 | 0.67        |
| MICALL2      | 134.5                                 | 133.6                                 | 0.99        | MCF2L        | 84.7                                  | 285.1                                 | 3.37        | MAN2C1       | 84.4                                  | 39.9                                  | 0.47        | LRRK32       | 42.1                                  | 50.6                                  | 1.20        |
| MICALL1      | 320.7                                 | 120.9                                 | 0.38        | MCEE         | 77.7                                  | 4                                     | 0.05        | MAN2B1       | 210                                   | 144.5                                 | 0.69        | LRRK1        | 159.4                                 | 543.3                                 | 3.41        |
| MICAL1       | 130.7                                 | 55.8                                  | 0.43        | MCCC2        | 69.9                                  | 8                                     | 0.11        | MAN2A1       | 100.9                                 | 297.6                                 | 2.95        | LRPPRC       | 90.4                                  | 16.7                                  | 0.18        |
| MIB2         | 90.5                                  | 126.4                                 | 1.40        | MCCC1        | 67.5                                  | 15.5                                  | 0.23        | MAN1B1       | 166.8                                 | 454.5                                 | 2.72        | LRPAP1       | 79.5                                  | 122.8                                 | 1.54        |
| MIA3         | 112.9                                 | 164.4                                 | 1.46        | MCAT         | 78.9                                  | 13.5                                  | 0.17        | MAN1A2       | 134.4                                 | 370.7                                 | 2.76        | LRP2         | 17                                    | 62.6                                  | 3.68        |

Values are expressed as % of protein abundance in TL of human kidney cortex 1.

## Supplemental table 5 (Continued):

| Protein name | 3D RP/TEC Spheroid_Lot.664995_day12_TL | 3D RP/TEC Spheroid_Lot.664995_day12_PM | PM/TL ratio | Protein name | 3D RP/TEC Spheroid_Lot.664995_day12_TL | 3D RP/TEC Spheroid_Lot.664995_day12_PM | PM/TL ratio | Protein name | 3D RP/TEC Spheroid_Lot.664995_day12_TL | 3D RP/TEC Spheroid_Lot.664995_day12_PM | PM/TL ratio | Protein name | 3D RP/TEC Spheroid_Lot.664995_day12_TL | 3D RP/TEC Spheroid_Lot.664995_day12_PM | PM/TL ratio |
|--------------|----------------------------------------|----------------------------------------|-------------|--------------|----------------------------------------|----------------------------------------|-------------|--------------|----------------------------------------|----------------------------------------|-------------|--------------|----------------------------------------|----------------------------------------|-------------|
| LRP10        | 1429                                   | 16105.3                                | 11.32       | LDHD         | 37.1                                   | 3.8                                    | 0.10        | KNG1         | 11.8                                   | 5.2                                    | 0.44        | ITPR2        | 65.5                                   | 240                                    | 3.66        |
| LRP1         | 18.2                                   | 26.7                                   | 1.47        | LDHB         | 194.7                                  | 39.1                                   | 0.20        | KMO          | 11                                     | 27.5                                   | 2.50        | ITPR1        | 55.3                                   | 157.7                                  | 2.85        |
| LRG1         | 1.8                                    | 1.8                                    | 1.00        | LDHA         | 253.8                                  | 48.8                                   | 0.19        | KLHDC7A      | 49                                     | 106.3                                  | 2.17        | ITPK1        | 346.9                                  | 66.8                                   | 0.19        |
| LRCH4        | 116.4                                  | 197.1                                  | 1.69        | LDHA         | 75.5                                   | 203.8                                  | 2.70        | KLHDC2       | 137.2                                  | 116.7                                  | 0.85        | ITPA         | 557.7                                  | 127.4                                  | 0.23        |
| LRBA         | 132.6                                  | 109.8                                  | 0.83        | LCP1         | 4.9                                    | 5.1                                    | 1.04        | KLC4         | 107.6                                  | 91.1                                   | 0.85        | ITM2C        | 221.7                                  | 3031.1                                 | 13.67       |
| LRATD2       | 61.1                                   | 78.7                                   | 1.29        | LCMT1        | 166                                    | 23.3                                   | 0.14        | KLC2         | 177.1                                  | 149.2                                  | 0.84        | ITM2B        | 920.8                                  | 5481                                   | 5.95        |
| LPP          | 100.4                                  | 44.4                                   | 0.44        | LCLAT1       | 75.2                                   | 205.2                                  | 2.73        | KLC1         | 158.3                                  | 85.3                                   | 0.54        | ITI5         | 20.3                                   | 25.7                                   | 1.27        |
| LPI3         | 154.9                                  | 89.7                                   | 0.58        | LBR          | 181                                    | 485.7                                  | 2.68        | KIRREL1      | 61.6                                   | 235.5                                  | 3.82        | ITI4         | 21.9                                   | 5.4                                    | 0.25        |
| LPI2         | 151.2                                  | 62.9                                   | 0.42        | LBP          | 4.9                                    | 2.8                                    | 0.57        | KIFBP        | 193.3                                  | 69.5                                   | 0.36        | ITI2         | 2.7                                    | 0.1                                    | 0.04        |
| LPGAT1       | 406.6                                  | 1658.2                                 | 4.08        | LASP1        | 138.9                                  | 37.5                                   | 0.27        | KIF5B        | 127.2                                  | 55.3                                   | 0.43        | ITI1         | 2.8                                    | 2.4                                    | 0.86        |
| LPCAT3       | 108.3                                  | 374.9                                  | 3.46        | LAS1L        | 210.5                                  | 235.3                                  | 1.12        | KIF3B        | 100.6                                  | 70.7                                   | 0.70        | ITGB8        | 132.3                                  | 644                                    | 4.87        |
| LPCAT2       | 14.2                                   | 40.4                                   | 2.85        | LARS2        | 120.1                                  | 24.2                                   | 0.20        | KIF21A       | 135.8                                  | 52                                     | 0.38        | ITGB6        | 74.3                                   | 461.9                                  | 6.22        |
| LPCAT1       | 113.3                                  | 265.4                                  | 2.34        | LARS1        | 230.3                                  | 63.2                                   | 0.27        | KIF1C        | 174.1                                  | 98.1                                   | 0.56        | ITGB5        | 64.3                                   | 336.8                                  | 5.24        |
| LONP2        | 57.4                                   | 20.1                                   | 0.35        | LARP7        | 276.5                                  | 33.8                                   | 0.12        | KIF13B       | 58.6                                   | 42.4                                   | 0.72        | ITGB4        | 132.4                                  | 595.4                                  | 4.50        |
| LONP1        | 118                                    | 10                                     | 0.08        | LARP4B       | 253.8                                  | 65.2                                   | 0.26        | KIDINS220    | 186.7                                  | 1079.7                                 | 5.78        | ITGB3        | 290.2                                  | 1820.3                                 | 6.27        |
| LNPK         | 92.1                                   | 260.9                                  | 2.83        | LARP4        | 217.5                                  | 96.7                                   | 0.44        | KIAA2013     | 82                                     | 189                                    | 2.30        | ITGB2        | 13.1                                   | 0.1                                    | 0.01        |
| LNPEP        | 141.2                                  | 546.3                                  | 3.87        | LARP1        | 161.8                                  | 78.4                                   | 0.48        | KIAA1217     | 65                                     | 118.5                                  | 1.82        | ITGB1        | 100.3                                  | 629.9                                  | 6.28        |
| LMTK2        | 98.4                                   | 162.8                                  | 1.65        | LAP3         | 73.2                                   | 14.7                                   | 0.20        | KIAA0319L    | 188                                    | 1195                                   | 6.36        | ITGAV        | 211.9                                  | 1413.7                                 | 6.67        |
| LMO7         | 70.4                                   | 37.9                                   | 0.54        | LANCL2       | 102.4                                  | 61                                     | 0.60        | KIAA0100     | 52.7                                   | 129.2                                  | 2.45        | ITGAM        | 48.2                                   | 0.1                                    | 0.00        |
| LMNB2        | 61.7                                   | 29.1                                   | 0.47        | LANCL1       | 96.3                                   | 35.7                                   | 0.37        | KHSRP        | 172.5                                  | 39.6                                   | 0.23        | ITGA9        | 0.1                                    | 18.1                                   | 181.00      |
| LMNB1        | 146.2                                  | 65.1                                   | 0.45        | LAMTOR5      | 77.2                                   | 487.5                                  | 6.31        | KHK          | 12.2                                   | 4.3                                    | 0.35        | ITGA8        | 33.6                                   | 6.4                                    | 0.19        |
| LMNA         | 118                                    | 26.7                                   | 0.23        | LAMTOR3      | 183.5                                  | 990.8                                  | 5.40        | KHDRBS1      | 248.9                                  | 66.7                                   | 0.27        | ITGA7        | 7.8                                    | 24                                     | 3.08        |
| LMF2         | 80.9                                   | 317.8                                  | 3.93        | LAMTOR2      | 199.1                                  | 953.2                                  | 4.79        | KDSR         | 91.6                                   | 299                                    | 3.26        | ITGA6        | 67.9                                   | 341.9                                  | 5.04        |
| LMCD1        | 51.8                                   | 20.5                                   | 0.40        | LAMTOR1      | 254.1                                  | 1922.3                                 | 7.57        | KDM3B        | 386.2                                  | 170.1                                  | 0.44        | ITGA6        | 92.3                                   | 317.2                                  | 3.44        |
| LMBRD1       | 433.6                                  | 3968.1                                 | 9.15        | LAMP2        | 341.9                                  | 1751.6                                 | 5.12        | KDM1B        | 138.7                                  | 43.6                                   | 0.31        | ITGA5        | 102.2                                  | 307.7                                  | 3.01        |
| LMAN2L       | 76.7                                   | 288.1                                  | 3.76        | LAMP1        | 332.7                                  | 2370.8                                 | 7.13        | KDM1A        | 120.2                                  | 50.8                                   | 0.42        | ITGA3        | 250.4                                  | 1751.7                                 | 7.00        |
| LMAN2        | 107.4                                  | 373.2                                  | 3.47        | LAMC1        | 30.2                                   | 13.5                                   | 0.45        | KCTD12       | 16.4                                   | 6.5                                    | 0.40        | ITGA2        | 72.5                                   | 428.4                                  | 5.91        |
| LMAN1        | 65.5                                   | 220.6                                  | 3.37        | LAMB2        | 11.1                                   | 7.1                                    | 0.64        | KCT2         | 168.4                                  | 1187.6                                 | 7.05        | ITGA1        | 12.2                                   | 48.7                                   | 3.99        |
| LLGL2        | 63.2                                   | 75.7                                   | 1.20        | LAMB1        | 51.8                                   | 29.9                                   | 0.58        | KCNJ15       | 335.4                                  | 3169.8                                 | 9.45        | ITFG1        | 166                                    | 785.9                                  | 4.73        |
| LIPA         | 281.1                                  | 181.7                                  | 0.65        | LAMA5        | 35.1                                   | 23.8                                   | 0.68        | KCNJ10       | 54.9                                   | 29                                     | 0.53        | ITCH         | 136.7                                  | 537                                    | 3.93        |
| LIN7C        | 241.6                                  | 707.8                                  | 2.93        | LAMA4        | 11.1                                   | 9                                      | 0.81        | KBTBD11      | 102.3                                  | 46.2                                   | 0.45        | ISYNA1       | 103.7                                  | 37.2                                   | 0.36        |
| LIN7A        | 119.8                                  | 535.5                                  | 4.47        | LAMA1        | 154.1                                  | 52.2                                   | 0.34        | KARS1        | 195.6                                  | 39.8                                   | 0.20        | ISY1         | 124                                    | 230.1                                  | 1.86        |
| LIMS1        | 62.4                                   | 41.5                                   | 0.67        | LAD1         | 155.9                                  | 51.3                                   | 0.33        | KANK3        | 4.4                                    | 5.4                                    | 1.23        | IST1         | 118.7                                  | 246.8                                  | 2.08        |
| LIMA1        | 249.5                                  | 199.9                                  | 0.80        | LACTB2       | 170.4                                  | 25.7                                   | 0.15        | KANK2        | 40.9                                   | 23.5                                   | 0.57        | ISOC2        | 70                                     | 5.9                                    | 0.08        |
| LIG3         | 251.9                                  | 81.6                                   | 0.32        | LACTB        | 78.7                                   | 190.8                                  | 2.42        | JUP          | 90.3                                   | 492                                    | 5.45        | ISOC15       | 192.4                                  | 208.6                                  | 1.08        |
| LIG1         | 121.1                                  | 187.7                                  | 1.55        | L3HYPDH      | 46.5                                   | 16.4                                   | 0.35        | JMJD7        | 96.5                                   | 37.8                                   | 0.39        | ISCA1        | 118.4                                  | 9.2                                    | 0.08        |
| LHPP         | 71.4                                   | 16.3                                   | 0.23        | L2HGDH       | 73.2                                   | 44                                     | 0.60        | JMJD6        | 171.5                                  | 36.5                                   | 0.21        | IRS4         | 36.5                                   | 79.5                                   | 2.18        |
| LGMN         | 45.4                                   | 21.4                                   | 0.47        | L1CAM        | 63.4                                   | 93.8                                   | 1.48        | JCHAIN       | 7.2                                    | 11.4                                   | 1.58        | IRF3         | 0.1                                    | 20.2                                   | 202.00      |
| LGALS        | 111                                    | 43.4                                   | 0.39        | KYNU         | 42.7                                   | 8.3                                    | 0.19        | JAM3         | 26                                     | 40.6                                   | 1.56        | IRF2BP1      | 75.1                                   | 36.8                                   | 0.49        |
| LGALS8       | 240.1                                  | 1226.4                                 | 5.11        | KYAT3        | 339.7                                  | 50.8                                   | 0.15        | JAK2         | 201.8                                  | 67.4                                   | 0.33        | IQSEC2       | 193.4                                  | 29.5                                   | 0.15        |
| LGALS3BP     | 176.9                                  | 254.4                                  | 1.44        | KTN1         | 113.3                                  | 61                                     | 0.54        | JAK1         | 204.7                                  | 1435.3                                 | 7.01        | IQGAP2       | 26                                     | 16.6                                   | 0.64        |
| LGALS3       | 355.8                                  | 827.4                                  | 2.33        | KRT18        | 136                                    | 36.4                                   | 0.27        | JAGN1        | 91.4                                   | 308                                    | 3.37        | IQGAP1       | 205.2                                  | 170.9                                  | 0.83        |
| LGALS2       | 39.8                                   | 18.9                                   | 0.47        | KRR1         | 178.9                                  | 171.2                                  | 0.96        | IYD          | 20.4                                   | 25.8                                   | 1.26        | IPO9         | 241.4                                  | 171.4                                  | 0.71        |
| LGALS1       | 173.4                                  | 215.2                                  | 1.24        | KRAS         | 74.6                                   | 216.1                                  | 2.90        | IWS1         | 295.4                                  | 27.4                                   | 0.09        | IPO7         | 231.7                                  | 85.1                                   | 0.37        |
| LETMD1       | 57.9                                   | 74                                     | 1.28        | KPNB1        | 199.7                                  | 75.2                                   | 0.38        | IVNS1ABP     | 173.1                                  | 82.2                                   | 0.47        | IPO5         | 180.6                                  | 106.5                                  | 0.59        |
| LETM1        | 119.8                                  | 346.3                                  | 2.89        | KPNA6        | 154.5                                  | 74.3                                   | 0.48        | IWD          | 56.6                                   | 7.6                                    | 0.13        | IPO4         | 195.6                                  | 92.5                                   | 0.47        |
| LEPROT       | 456.7                                  | 4476.8                                 | 9.80        | KPNA4        | 144.2                                  | 64.8                                   | 0.45        | ITSN1        | 112.6                                  | 55.6                                   | 0.49        | IPO13        | 400.8                                  | 387.3                                  | 0.97        |
| LEMD3        | 115.6                                  | 130.5                                  | 1.13        | KPNA3        | 348.8                                  | 180.8                                  | 0.52        | ITPRIP       | 157                                    | 326.9                                  | 2.08        | IPO11        | 302.9                                  | 197.6                                  | 0.65        |
| LEMD2        | 99.4                                   | 177.6                                  | 1.79        | KPNA2        | 952.4                                  | 751                                    | 0.79        | ITPRID2      | 181.2                                  | 225.6                                  | 1.25        | INTS3        | 132.7                                  | 228.5                                  | 1.72        |
| LDLR         | 2279.8                                 | 9702                                   | 4.26        | KPNA1        | 134.4                                  | 93.6                                   | 0.70        | ITPR3        | 369.7                                  | 1387.6                                 | 3.75        | INTS1        | 136.9                                  | 122.1                                  | 0.89        |

Values are expressed as % of protein abundance in TL of human kidney cortex 1.

**Supplemental table 5 (Continued):**

| Protein name | 3D RPTEC Spheroid_Lot.664995_day12_TL | 3D RPTEC Spheroid_Lot.664995_day12_PM | PM/TL ratio | Protein name | 3D RPTEC Spheroid_Lot.664995_day12_TL | 3D RPTEC Spheroid_Lot.664995_day12_PM | PM/TL ratio | Protein name | 3D RPTEC Spheroid_Lot.664995_day12_TL | 3D RPTEC Spheroid_Lot.664995_day12_PM | PM/TL ratio | Protein name | 3D RPTEC Spheroid_Lot.664995_day12_TL | 3D RPTEC Spheroid_Lot.664995_day12_PM | PM/TL ratio |
|--------------|---------------------------------------|---------------------------------------|-------------|--------------|---------------------------------------|---------------------------------------|-------------|--------------|---------------------------------------|---------------------------------------|-------------|--------------|---------------------------------------|---------------------------------------|-------------|
| INSR         | 98.6                                  | 231.1                                 | 2.34        | IFT122       | 91                                    | 80.3                                  | 0.88        | HSP90B1      | 94.8                                  | 72.4                                  | 0.76        | HNRNPA0      | 148.8                                 | 23.8                                  | 0.16        |
| INPPL1       | 103.1                                 | 131.9                                 | 1.28        | IFITM3       | 1407.3                                | 7353                                  | 5.22        | HSP90AB1     | 185.8                                 | 45.7                                  | 0.25        | HNMT         | 78.2                                  | 29.7                                  | 0.38        |
| INPP5K       | 82                                    | 237.5                                 | 2.90        | IFIT5        | 56.6                                  | 12.8                                  | 0.23        | HSP90AA1     | 139.6                                 | 34.5                                  | 0.25        | HMOX2        | 153.2                                 | 576.9                                 | 3.77        |
| INPP5A       | 75                                    | 384.1                                 | 5.12        | IFIT3        | 40.8                                  | 21.1                                  | 0.52        | HSDL2        | 79.4                                  | 9.7                                   | 0.12        | HMOX1        | 22.7                                  | 53.6                                  | 2.36        |
| INPP1        | 336.3                                 | 85.5                                  | 0.25        | IFIT2        | 40.8                                  | 0.1                                   | 0.00        | HSDL1        | 97.4                                  | 377.4                                 | 3.87        | HMGN4        | 75.1                                  | 3                                     | 0.04        |
| INO80C       | 151.6                                 | 12.2                                  | 0.08        | IFIT1        | 73.1                                  | 30.8                                  | 0.42        | HSD3B7       | 99.3                                  | 344.7                                 | 3.47        | HMGN3        | 445.5                                 | 18.1                                  | 0.04        |
| INF2         | 194.2                                 | 176.4                                 | 0.91        | IFI35        | 302.9                                 | 64.5                                  | 0.21        | HSD17B8      | 37.7                                  | 5.5                                   | 0.15        | HMGN2        | 40.5                                  | 4.1                                   | 0.10        |
| IMPDH2       | 157.3                                 | 57.4                                  | 0.36        | IFI30        | 100.1                                 | 66.3                                  | 0.66        | HSD17B7      | 338.4                                 | 1293.5                                | 3.82        | HMGN1        | 382.1                                 | 47.4                                  | 0.12        |
| IMPAD1       | 126.3                                 | 480.8                                 | 3.81        | IFI16        | 51.4                                  | 44.4                                  | 0.86        | HSD17B4      | 139.3                                 | 40.6                                  | 0.29        | HMGCS2       | 4                                     | 3.1                                   | 0.78        |
| IMP2         | 90.5                                  | 60.1                                  | 0.66        | IDNK         | 40.7                                  | 55.6                                  | 1.37        | HSD17B12     | 94.9                                  | 289.8                                 | 3.05        | HMGCS1       | 11186.2                               | 2956.6                                | 0.26        |
| IMPA1        | 360.2                                 | 67.8                                  | 0.19        | ID1          | 558.7                                 | 136                                   | 0.24        | HSD17B11     | 127.7                                 | 337.3                                 | 2.64        | HMGCL        | 78.9                                  | 4.8                                   | 0.06        |
| IMMT         | 82.2                                  | 243.6                                 | 2.96        | IDH3G        | 161.7                                 | 21.7                                  | 0.13        | HSD17B10     | 109                                   | 113.0                                 | 1.04        | HMGCB3       | 392.9                                 | 0.1                                   | 0.00        |
| IMMT         | 93.2                                  | 272.6                                 | 2.92        | IDH3B        | 189.5                                 | 34.5                                  | 0.18        | HSD11B2      | 5.6                                   | 5.3                                   | 0.95        | HMGCB2       | 97.8                                  | 4.7                                   | 0.05        |
| ILVBL        | 46.5                                  | 133.7                                 | 2.88        | IDH3A        | 242.6                                 | 41.5                                  | 0.17        | HSCB         | 107.1                                 | 10.2                                  | 0.10        | HMGCB1       | 125.6                                 | 14.4                                  | 0.11        |
| ILKAP        | 253                                   | 69                                    | 0.27        | IDH2         | 96.7                                  | 7.6                                   | 0.08        | HSD2T1       | 97.5                                  | 299                                   | 3.07        | HMGA1        | 1178.5                                | 34.3                                  | 0.03        |
| ILK          | 55.6                                  | 55.3                                  | 0.99        | IDH1         | 143.3                                 | 32.6                                  | 0.23        | HS1BP3       | 340.3                                 | 93.6                                  | 0.28        | HMGA1        | 295.9                                 | 41                                    | 0.14        |
| ILF3         | 143.2                                 | 84.1                                  | 0.59        | IDE          | 304                                   | 84.2                                  | 0.28        | HRG          | 7.1                                   | 2.9                                   | 0.41        | HMBS         | 232.1                                 | 25.7                                  | 0.11        |
| ILF2         | 138.1                                 | 72.8                                  | 0.53        | ICMT         | 102.8                                 | 317.5                                 | 3.09        | HPX          | 3.3                                   | 2.9                                   | 0.88        | HM13         | 147.5                                 | 542.1                                 | 3.68        |
| IL41         | 565.9                                 | 365.4                                 | 0.65        | ICAM2        | 9                                     | 4.9                                   | 0.54        | HPF6         | 218.3                                 | 377.6                                 | 1.73        | HLCS         | 152.9                                 | 190.1                                 | 1.24        |
| IL32         | 393.3                                 | 514.1                                 | 13.07       | ICAM1        | 267.8                                 | 1437.4                                | 5.37        | HPF3         | 118.7                                 | 200.7                                 | 1.69        | HLA-H        | 922.8                                 | 7194.5                                | 7.80        |
| IL18         | 252.2                                 | 49.6                                  | 0.20        | ICA1         | 330.8                                 | 297                                   | 0.90        | HPRT1        | 46.3                                  | 15.2                                  | 0.33        | HLA-F        | 351.7                                 | 2175.1                                | 6.18        |
| IL13RA1      | 259.5                                 | 2182                                  | 8.41        | IBA57        | 54.3                                  | 3.9                                   | 0.07        | HPN          | 290.5                                 | 1981.4                                | 6.82        | HLA-E        | 223.1                                 | 1847                                  | 8.28        |
| IKBKB        | 181.3                                 | 104                                   | 0.57        | IARS2        | 84.7                                  | 22.2                                  | 0.26        | HPD          | 12.9                                  | 5.7                                   | 0.44        | HLA-DRB3     | 9.1                                   | 39.7                                  | 4.36        |
| IKBIP        | 331.1                                 | 1084.5                                | 3.28        | IARS1        | 280.8                                 | 101.6                                 | 0.36        | HPCAL1       | 87                                    | 122.1                                 | 1.40        | HLA-DRB1     | 18.7                                  | 110                                   | 5.88        |
| IKBIP        | 217.2                                 | 801.8                                 | 3.69        | IAH1         | 87.9                                  | 15.7                                  | 0.18        | HP1BP3       | 97.4                                  | 56.4                                  | 0.58        | HLA-DRA      | 30.5                                  | 125.3                                 | 4.11        |
| IK           | 229.3                                 | 51.3                                  | 0.22        | HYOU1        | 115.6                                 | 80.2                                  | 0.69        | HP           | 5.7                                   | 4.6                                   | 0.81        | HLA-DPA1     | 26.4                                  | 47.2                                  | 1.79        |
| IGSF8        | 69                                    | 426.3                                 | 6.18        | HUWE1        | 135.6                                 | 82                                    | 0.60        | HOOK1        | 155.6                                 | 121.6                                 | 0.78        | HLA-DMA      | 87.2                                  | 806.7                                 | 9.25        |
| IGSF3        | 306                                   | 922.6                                 | 3.02        | HTT          | 164.5                                 | 130.6                                 | 0.79        | HOMER3       | 288.2                                 | 484.3                                 | 1.68        | HLA-C        | 192.5                                 | 1215.9                                | 6.32        |
| IGLL5        | 1.1                                   | 0.2                                   | 0.18        | HTRA2        | 76.2                                  | 48.1                                  | 0.63        | HOGA1        | 54.8                                  | 7.9                                   | 0.14        | HLA-B        | 87.7                                  | 473                                   | 5.39        |
| IGLC2        | 6.1                                   | 3.3                                   | 0.54        | HTATSF1      | 162.2                                 | 35.6                                  | 0.22        | HNRNPUL2     | 126.8                                 | 91.9                                  | 0.72        | HLA-A        | 9.8                                   | 13.2                                  | 1.35        |
| IGKV1D-39    | 7.3                                   | 0.1                                   | 0.01        | HTATIP2      | 341.3                                 | 693.5                                 | 2.03        | HNRNPUL1     | 172.8                                 | 79.8                                  | 0.46        | HLA-A        | 52.7                                  | 342.9                                 | 6.51        |
| IGKC         | 4                                     | 2.1                                   | 0.53        | HSPH1        | 218.6                                 | 74.9                                  | 0.34        | HNRNPU       | 144.3                                 | 108.7                                 | 0.75        | HKDC1        | 222.8                                 | 873.5                                 | 3.92        |
| IGHV3-7      | 4.8                                   | 6.8                                   | 1.42        | HSPG2        | 6.2                                   | 4.1                                   | 0.66        | HNRNPU       | 487.2                                 | 280.9                                 | 0.58        | HK2          | 1064.6                                | 528.3                                 | 0.50        |
| IGHV3-30     | 4.1                                   | 6.7                                   | 1.63        | HSP1         | 90.4                                  | 5.6                                   | 0.06        | HNRNPR       | 110.7                                 | 58.1                                  | 0.52        | HK1          | 191.2                                 | 388.6                                 | 2.03        |
| IGHM         | 19.8                                  | 20.4                                  | 1.03        | HSPD1        | 106.7                                 | 10.3                                  | 0.10        | HNRNPM       | 128.4                                 | 78.1                                  | 0.61        | HIST2H3A     | 216.1                                 | 49.5                                  | 0.23        |
| IGHG4        | 2.4                                   | 0.1                                   | 0.04        | HSPBP1       | 174.6                                 | 55.4                                  | 0.32        | HNRNPL       | 113                                   | 86.4                                  | 0.76        | HIST2H2AC    | 47.7                                  | 19.3                                  | 0.40        |
| IGHG3        | 3                                     | 4                                     | 1.33        | HSPB6        | 3.2                                   | 0.1                                   | 0.03        | HNRNPL       | 190.9                                 | 34                                    | 0.18        | HIP1R        | 79.4                                  | 59.3                                  | 0.75        |
| IGHG2        | 2.8                                   | 3.4                                   | 1.21        | HSPB11       | 189.1                                 | 38.9                                  | 0.21        | HNRNPK       | 230.4                                 | 34.4                                  | 0.15        | HIP1         | 45.6                                  | 51.5                                  | 1.13        |
| IGHG1        | 1.9                                   | 3.8                                   | 2.00        | HSPB1        | 103                                   | 20.2                                  | 0.20        | HNRNPK       | 217.1                                 | 29.6                                  | 0.14        | HINT3        | 100.9                                 | 218.8                                 | 2.17        |
| IGHD         | 28.4                                  | 15.9                                  | 0.56        | HSPA9        | 103.6                                 | 13.4                                  | 0.13        | HNRNPH3      | 177.2                                 | 61.5                                  | 0.35        | HINT2        | 62.6                                  | 3.6                                   | 0.06        |
| IGHA1        | 3.1                                   | 2.6                                   | 0.84        | HSPA8        | 182.8                                 | 267.6                                 | 1.46        | HNRNPH2      | 109.5                                 | 49.6                                  | 0.45        | HINT1        | 174.9                                 | 50.3                                  | 0.29        |
| IGFBP7       | 244.7                                 | 163.3                                 | 0.67        | HSPA5        | 138.1                                 | 175.7                                 | 1.27        | HNRNPH1      | 159                                   | 106.8                                 | 0.67        | HIBCH        | 27.7                                  | 3.6                                   | 0.13        |
| IGFBP4       | 106.4                                 | 245.9                                 | 2.31        | HSPA4L       | 223.6                                 | 66.8                                  | 0.30        | HNRNPF       | 118.7                                 | 41.3                                  | 0.35        | HIBADH       | 76.7                                  | 6                                     | 0.08        |
| IGF2R        | 149.2                                 | 555                                   | 3.72        | HSPA4        | 215.2                                 | 49.9                                  | 0.23        | HNRNPD       | 169                                   | 25                                    | 0.15        | HGS          | 200.1                                 | 162.1                                 | 0.81        |
| IGF2BP3      | 854.5                                 | 532.9                                 | 0.62        | HSPA2        | 39.5                                  | 43.9                                  | 1.10        | HNRNPD       | 159.7                                 | 15.7                                  | 0.10        | HGH1         | 174.1                                 | 79.1                                  | 0.45        |
| IGF2BP2      | 327.9                                 | 139.5                                 | 0.43        | HSPA1B       | 127.9                                 | 176.4                                 | 1.38        | HNRNPC       | 166.2                                 | 184.1                                 | 1.11        | HGD          | 109.3                                 | 25.3                                  | 0.23        |
| IGF2BP1      | 204.1                                 | 156.8                                 | 0.77        | HSPA14       | 299.9                                 | 80.9                                  | 0.27        | HNRNPAB      | 202                                   | 27                                    | 0.13        | HEXB         | 66.6                                  | 42                                    | 0.63        |
| IGF1R        | 99.7                                  | 397.6                                 | 3.99        | HSPA13       | 73.7                                  | 132.2                                 | 1.79        | HNRNPA3      | 131.5                                 | 27.3                                  | 0.21        | HEXA         | 74.1                                  | 44.8                                  | 0.60        |
| IGBP1        | 129.8                                 | 32.1                                  | 0.25        | HSPA12B      | 21.5                                  | 37.8                                  | 1.76        | HNRNPA2B1    | 141.8                                 | 18.2                                  | 0.13        | HERPUD1      | 169.5                                 | 744                                   | 4.39        |
| IFT27        | 122.2                                 | 53.3                                  | 0.44        | HSPA12A      | 30.8                                  | 21.5                                  | 0.70        | HNRNPA1      | 174.7                                 | 47.5                                  | 0.27        | HERC5        | 124.5                                 | 166.3                                 | 1.34        |

Values are expressed as % of protein abundance in TL of human kidney cortex 1.

## Supplemental table 5 (Continued):

| Protein name | 3D RPTEC Spheroid_Lot.664995_day12_TL | 3D RPTEC Spheroid_Lot.664995_day12_PM | PM/TL ratio | Protein name | 3D RPTEC Spheroid_Lot.664995_day12_TL | 3D RPTEC Spheroid_Lot.664995_day12_PM | PM/TL ratio | Protein name | 3D RPTEC Spheroid_Lot.664995_day12_TL | 3D RPTEC Spheroid_Lot.664995_day12_PM | PM/TL ratio | Protein name | 3D RPTEC Spheroid_Lot.664995_day12_TL | 3D RPTEC Spheroid_Lot.664995_day12_PM | PM/TL ratio |
|--------------|---------------------------------------|---------------------------------------|-------------|--------------|---------------------------------------|---------------------------------------|-------------|--------------|---------------------------------------|---------------------------------------|-------------|--------------|---------------------------------------|---------------------------------------|-------------|
| HERC4        | 254.5                                 | 88.3                                  | 0.35        | H1-4         | 70.9                                  | 91.7                                  | 1.29        | GPX1         | 251.9                                 | 44                                    | 0.17        | GNAS         | 91.5                                  | 576.3                                 | 6.30        |
| HERC2        | 115.6                                 | 145.6                                 | 1.26        | H1-3         | 34.1                                  | 27.9                                  | 0.82        | GPT2         | 130.4                                 | 11.6                                  | 0.09        | GNAS         | 108.1                                 | 380.4                                 | 3.52        |
| HERC1        | 117.5                                 | 43.5                                  | 0.37        | H1-2         | 72.3                                  | 34.1                                  | 0.47        | GPT          | 26.6                                  | 7.1                                   | 0.27        | GNAS         | 125.8                                 | 428.1                                 | 3.40        |
| HELZ         | 244.3                                 | 219.9                                 | 0.90        | H1-1         | 54.4                                  | 24.1                                  | 0.44        | GPS1         | 100.4                                 | 416.8                                 | 4.15        | GNAQ         | 100.9                                 | 452.5                                 | 4.48        |
| HECTD4       | 209.4                                 | 138.5                                 | 0.66        | H1-0         | 23.8                                  | 19.3                                  | 0.81        | GPRIN3       | 79                                    | 268.9                                 | 3.40        | GNAI3        | 116.5                                 | 819.8                                 | 7.04        |
| HECTD3       | 136.9                                 | 90.5                                  | 0.66        | GYS1         | 232                                   | 587.4                                 | 2.53        | GPRC5C       | 238.6                                 | 2213.2                                | 9.28        | GNAI2        | 99.1                                  | 518                                   | 5.23        |
| HECTD1       | 130.9                                 | 76.7                                  | 0.59        | GYPC         | 0.1                                   | 318.5                                 | 3185.00     | GPRC5A       | 156.1                                 | 1314.9                                | 8.42        | GNAI1        | 130.7                                 | 710.6                                 | 5.44        |
| HEBP2        | 127                                   | 34                                    | 0.27        | GYPB         | 83.7                                  | 21.1                                  | 0.25        | GPR89B       | 41.8                                  | 177.5                                 | 4.25        | GNAI3        | 129.1                                 | 747.1                                 | 5.79        |
| HEBP1        | 232.4                                 | 114.2                                 | 0.49        | GYG1         | 191.4                                 | 488                                   | 2.55        | GPR155       | 190.3                                 | 2118.9                                | 11.13       | GNAI2        | 97.1                                  | 612.7                                 | 6.31        |
| HEATR5B      | 122.7                                 | 123.7                                 | 1.01        | GUSB         | 61.5                                  | 49                                    | 0.80        | GPR108       | 118.5                                 | 639.2                                 | 5.39        | GNAI1        | 76.1                                  | 373.4                                 | 4.91        |
| HEATR1       | 184.5                                 | 277.4                                 | 1.50        | GUK1         | 120.6                                 | 43.8                                  | 0.36        | GPR107       | 136.2                                 | 901.6                                 | 6.62        | GMPS         | 240.6                                 | 58.5                                  | 0.24        |
| HDLBP        | 147.8                                 | 40.9                                  | 0.28        | GUF1         | 14                                    | 9.2                                   | 0.66        | GNPMB        | 174.2                                 | 513.4                                 | 2.95        | GMPR2        | 159.7                                 | 67.4                                  | 0.42        |
| HDHD5        | 170                                   | 4                                     | 0.02        | GUCY1B1      | 88.2                                  | 155.9                                 | 1.77        | GPI          | 212.4                                 | 44.2                                  | 0.21        | GMPR         | 472.4                                 | 113.8                                 | 0.24        |
| HDHD3        | 47.4                                  | 4.6                                   | 0.10        | GTPBP6       | 58.2                                  | 145.7                                 | 2.50        | GPHN         | 65.5                                  | 22.3                                  | 0.34        | GMPPB        | 151.8                                 | 27.3                                  | 0.18        |
| HDHD2        | 109.2                                 | 32.1                                  | 0.29        | GTPBP4       | 200.1                                 | 225.8                                 | 1.13        | GPD2         | 136.7                                 | 311.5                                 | 2.28        | GMPPA        | 123.4                                 | 32.8                                  | 0.27        |
| HDFGL3       | 24.1                                  | 4.8                                   | 0.20        | GTPBP10      | 206                                   | 19.7                                  | 0.10        | GPD1L        | 115.5                                 | 23                                    | 0.20        | GMFB         | 146.7                                 | 32.7                                  | 0.22        |
| HDFGL2       | 537.3                                 | 52                                    | 0.10        | GTF3C6       | 143.3                                 | 70.9                                  | 0.49        | GPD1         | 59.4                                  | 12.6                                  | 0.21        | GMD5         | 204.2                                 | 55.1                                  | 0.27        |
| HDGF         | 252.3                                 | 27.4                                  | 0.11        | GTF3C3       | 172                                   | 145.1                                 | 0.84        | GPC4         | 136.6                                 | 305.5                                 | 2.24        | GM2A         | 19.9                                  | 13.9                                  | 0.70        |
| HDDC3        | 91.4                                  | 63.3                                  | 0.69        | GTF3C2       | 93                                    | 53                                    | 0.57        | GPC3         | 274.7                                 | 513.4                                 | 1.87        | GLYR1        | 68.6                                  | 44.6                                  | 0.65        |
| HDDC2        | 86.4                                  | 33.1                                  | 0.38        | GTF3C1       | 111.8                                 | 92.1                                  | 0.82        | GPC1         | 112.1                                 | 213.4                                 | 1.90        | GLYCTK       | 51.6                                  | 14.5                                  | 0.28        |
| HDAC6        | 58.8                                  | 20.7                                  | 0.35        | GTF2I        | 145.8                                 | 55.8                                  | 0.38        | GPAT3        | 38.7                                  | 110                                   | 2.84        | GLYATL1      | 10.3                                  | 2.4                                   | 0.23        |
| HDAC2        | 109.2                                 | 41.9                                  | 0.38        | GTF2F2       | 623.6                                 | 118.6                                 | 0.19        | GPAM         | 69.8                                  | 168.9                                 | 2.42        | GLYATL       | 15.1                                  | 2                                     | 0.13        |
| HDAC1        | 144.9                                 | 47.3                                  | 0.33        | GTF2B        | 144.2                                 | 60.1                                  | 0.42        | GPA1         | 115.9                                 | 555.9                                 | 4.80        | GLUL         | 630.5                                 | 127.9                                 | 0.20        |
| HCFC1        | 139.1                                 | 35.7                                  | 0.26        | GSTZ1        | 79.3                                  | 10.6                                  | 0.13        | GOT2         | 147.2                                 | 8                                     | 0.05        | GLUD1        | 73.7                                  | 7.2                                   | 0.10        |
| HCCS         | 176.2                                 | 623                                   | 3.50        | GSTT2B       | 54.2                                  | 13.4                                  | 0.25        | GOT1         | 157.1                                 | 41.1                                  | 0.26        | GLTPD2       | 0.1                                   | 16.5                                  | 165.00      |
| HBS1L        | 154.7                                 | 75.7                                  | 0.49        | GSTT1        | 3.8                                   | 7.7                                   | 2.03        | GOSR2        | 75.5                                  | 244.5                                 | 3.24        | GLTP         | 93.8                                  | 31.4                                  | 0.33        |
| HBG1         | 98.6                                  | 95.3                                  | 0.97        | GSTO1        | 171.2                                 | 30.4                                  | 0.18        | GOSR1        | 105.8                                 | 344.6                                 | 3.26        | GLT8D1       | 154.5                                 | 537.1                                 | 3.48        |
| HBD          | 10.8                                  | 73.7                                  | 6.82        | GSTM3        | 66.9                                  | 21.3                                  | 0.32        | GORASP2      | 139.3                                 | 87.8                                  | 0.63        | GLS          | 165.7                                 | 16.2                                  | 0.10        |
| HAT1         | 205                                   | 73.7                                  | 0.36        | GSTM2        | 44.5                                  | 4.5                                   | 0.10        | GOPC         | 170.3                                 | 133.4                                 | 0.78        | GLS          | 83.5                                  | 11.8                                  | 0.14        |
| HARS2        | 176.6                                 | 26.1                                  | 0.15        | GSTM1        | 38.2                                  | 21.6                                  | 0.57        | GOLPH3       | 161.9                                 | 57.7                                  | 0.36        | GLRX5        | 241.9                                 | 15.4                                  | 0.06        |
| HAO2         | 6.5                                   | 9                                     | 1.38        | GSTK1        | 132.4                                 | 44.9                                  | 0.34        | GOLM1        | 192.5                                 | 827.8                                 | 4.30        | GLRX3        | 423.1                                 | 110                                   | 0.26        |
| HAGH         | 76.6                                  | 19                                    | 0.25        | GSTA4        | 31.8                                  | 14                                    | 0.44        | GOLM4        | 102.3                                 | 282.2                                 | 2.76        | GLOD5        | 7.9                                   | 0.1                                   | 0.01        |
| HADHB        | 74.4                                  | 149.3                                 | 2.01        | GSS          | 187                                   | 39.5                                  | 0.21        | GOLGB1       | 102.3                                 | 34.3                                  | 0.34        | GLOD4        | 155.5                                 | 28.5                                  | 0.18        |
| HADHA        | 68.5                                  | 133.5                                 | 1.95        | GSR          | 211.3                                 | 45.2                                  | 0.21        | GOLGA7       | 180.8                                 | 882.4                                 | 4.88        | GLO1         | 255.8                                 | 54.8                                  | 0.21        |
| HADH         | 43.8                                  | 2.2                                   | 0.05        | GSPT1        | 240.5                                 | 60                                    | 0.25        | GOLGA5       | 161.7                                 | 360.6                                 | 2.23        | GLIPR2       | 32.6                                  | 121.2                                 | 3.72        |
| HACL1        | 67.9                                  | 20                                    | 0.29        | GSN          | 22.5                                  | 9.6                                   | 0.43        | GOLGA4       | 72.5                                  | 84.6                                  | 1.17        | GLG1         | 125                                   | 365.8                                 | 2.93        |
| HACD3        | 116                                   | 410.4                                 | 3.54        | GSK3B        | 180.9                                 | 191.8                                 | 1.06        | GOLGA2       | 98.1                                  | 130.9                                 | 1.33        | GLE1         | 226.9                                 | 113.8                                 | 0.50        |
| HACD2        | 319.4                                 | 1105.6                                | 3.46        | GSDME        | 475.6                                 | 487.7                                 | 1.03        | GNS          | 421.2                                 | 208.8                                 | 0.50        | GLDC         | 215.4                                 | 25.2                                  | 0.12        |
| HABP2        | 33                                    | 37.9                                  | 1.15        | GSDMD        | 72.4                                  | 26.3                                  | 0.36        | GNPNAT1      | 328.3                                 | 45.9                                  | 0.14        | GLCE         | 50.6                                  | 138.2                                 | 2.73        |
| HAAO         | 24.6                                  | 9.5                                   | 0.39        | GRWD1        | 148                                   | 45.7                                  | 0.31        | GNPDA2       | 148.3                                 | 31                                    | 0.21        | GLB1L2       | 58.8                                  | 84.6                                  | 1.44        |
| H6PD         | 142.5                                 | 129.8                                 | 0.91        | GRSF1        | 237.6                                 | 50.8                                  | 0.21        | GNPDA1       | 106.5                                 | 26.3                                  | 0.25        | GLB1         | 136.6                                 | 112.6                                 | 0.82        |
| H4C1         | 48.2                                  | 32.5                                  | 0.67        | GRPEL1       | 148.2                                 | 8.1                                   | 0.05        | GNPAT        | 292.6                                 | 362.6                                 | 1.24        | GLA          | 54.2                                  | 90.5                                  | 1.67        |
| H3C1         | 215.1                                 | 26.1                                  | 0.12        | GRK2         | 122.2                                 | 132.8                                 | 1.09        | GNL3         | 231.8                                 | 226.6                                 | 0.98        | GK           | 11.2                                  | 9.5                                   | 0.85        |
| H3-3A        | 10.9                                  | 1.7                                   | 0.16        | GRIPAP1      | 99.2                                  | 20.7                                  | 0.21        | GNL2         | 275.6                                 | 199.5                                 | 0.72        | GIT2         | 116.6                                 | 78                                    | 0.67        |
| H2BC12       | 57.1                                  | 36.1                                  | 0.63        | GRHPR        | 76.9                                  | 15.9                                  | 0.21        | GNL1         | 136                                   | 49.2                                  | 0.36        | GIT1         | 131                                   | 70.8                                  | 0.54        |
| H2AX         | 79                                    | 38.9                                  | 0.49        | GRB2         | 114.7                                 | 218                                   | 1.90        | GNG12        | 97.5                                  | 727.1                                 | 7.46        | GIPC2        | 44.1                                  | 24.3                                  | 0.55        |
| H2AFY2       | 113.9                                 | 95.4                                  | 0.84        | GRAMD1A      | 137.2                                 | 578.8                                 | 4.22        | GNB4         | 54.9                                  | 250.7                                 | 4.57        | GIPC1        | 198.5                                 | 154.7                                 | 0.78        |
| H2AFV        | 41                                    | 30.2                                  | 0.74        | GPX8         | 117.3                                 | 473.1                                 | 4.03        | GNB2         | 96.8                                  | 557.3                                 | 5.76        | GIGYF2       | 210                                   | 47.2                                  | 0.22        |
| H1FX         | 20                                    | 13                                    | 0.65        | GPX4         | 114.1                                 | 83.6                                  | 0.73        | GNB1         | 121.5                                 | 749.2                                 | 6.17        | GIDS         | 77.6                                  | 33.6                                  | 0.43        |
| H1-5         | 273.1                                 | 243.7                                 | 0.89        | GPX3         | 1.4                                   | 1.1                                   | 0.79        | GNAZ         | 18.1                                  | 95.9                                  | 5.30        | GHTM         | 80.9                                  | 299.6                                 | 3.70        |

Values are expressed as % of protein abundance in TL of human kidney cortex 1.

Supplemental table 5 (Continued):

| Protein name | 3D RPTEC Spheroid_Lot.664995_day12_TL |       |      | 3D RPTEC Spheroid_Lot.664995_day12_PM |  |  | Protein name | 3D RPTEC Spheroid_Lot.664995_day12_TL |        |       | 3D RPTEC Spheroid_Lot.664995_day12_PM |  |  | Protein name | 3D RPTEC Spheroid_Lot.664995_day12_TL |       |      | 3D RPTEC Spheroid_Lot.664995_day12_PM |  |  |          |        |        |       |
|--------------|---------------------------------------|-------|------|---------------------------------------|--|--|--------------|---------------------------------------|--------|-------|---------------------------------------|--|--|--------------|---------------------------------------|-------|------|---------------------------------------|--|--|----------|--------|--------|-------|
|              | PM/TL ratio                           |       |      | PM/TL ratio                           |  |  |              | PM/TL ratio                           |        |       | PM/TL ratio                           |  |  |              | PM/TL ratio                           |       |      | PM/TL ratio                           |  |  |          |        |        |       |
| GHDC         | 28.7                                  | 86.3  | 3.01 |                                       |  |  | GAPDH        | 165.1                                 | 40.4   | 0.24  |                                       |  |  | FPGT         | 145.4                                 | 42    | 0.29 |                                       |  |  | FGG      | 5.3    | 6      | 1.13  |
| GGT7         | 175                                   | 474.9 | 2.71 |                                       |  |  | GANAB        | 110.1                                 | 112.5  | 1.02  |                                       |  |  | FOXRED1      | 181.8                                 | 401.5 | 2.21 |                                       |  |  | FGP2     | 123.4  | 11.5   | 0.09  |
| GGT5         | 6.5                                   | 5.9   | 0.91 |                                       |  |  | GAMT         | 130.1                                 | 30     | 0.23  |                                       |  |  | FOXX1        | 144.7                                 | 45.1  | 0.31 |                                       |  |  | FGD4     | 84     | 67.9   | 0.81  |
| GGT1         | 97.3                                  | 644.4 | 6.62 |                                       |  |  | GALT         | 73.9                                  | 32.1   | 0.43  |                                       |  |  | FOLR2        | 12.7                                  | 9.7   | 0.76 |                                       |  |  | FGB      | 8.2    | 7.9    | 0.96  |
| GGPS1        | 368.9                                 | 57.1  | 0.15 |                                       |  |  | GALNT7       | 248.5                                 | 795.4  | 3.20  |                                       |  |  | FOLR1        | 109.9                                 | 689.6 | 6.27 |                                       |  |  | FGA      | 8      | 1.9    | 2.38  |
| GGH          | 25.5                                  | 15.4  | 0.60 |                                       |  |  | GALNT4       | 162.1                                 | 533.5  | 3.29  |                                       |  |  | FOLH1        | 9.1                                   | 38.1  | 4.19 |                                       |  |  | FERMT2   | 36.6   | 30     | 0.82  |
| GGCX         | 170                                   | 559.1 | 3.29 |                                       |  |  | GALNT2       | 91.5                                  | 248.3  | 2.71  |                                       |  |  | FNTB         | 134.5                                 | 31.9  | 0.24 |                                       |  |  | FEN1     | 442.3  | 83     | 0.19  |
| GGCT         | 156.8                                 | 45.3  | 0.29 |                                       |  |  | GALNT14      | 154.9                                 | 366.2  | 2.36  |                                       |  |  | FNTA         | 129.2                                 | 28.5  | 0.22 |                                       |  |  | FECH     | 77.4   | 27.5   | 0.36  |
| GGACT        | 18.7                                  | 6.6   | 0.35 |                                       |  |  | GALNT11      | 199                                   | 698.1  | 3.51  |                                       |  |  | FNDC3B       | 138.1                                 | 199.8 | 1.45 |                                       |  |  | FDXR     | 187    | 26.4   | 0.14  |
| GFRA1        | 24.6                                  | 11.1  | 0.45 |                                       |  |  | GALNT10      | 329.5                                 | 1251.9 | 3.80  |                                       |  |  | FNDC3A       | 94.7                                  | 183.2 | 1.93 |                                       |  |  | FDX1     | 76.1   | 63.1   | 0.83  |
| GFPT1        | 142.8                                 | 46.1  | 0.32 |                                       |  |  | GALNT1       | 187.5                                 | 516.9  | 2.76  |                                       |  |  | FNBP1L       | 149.8                                 | 101.2 | 0.68 |                                       |  |  | FDPS     | 298    | 60.7   | 0.20  |
| GFM2         | 195.7                                 | 52    | 0.27 |                                       |  |  | GALNS        | 639.8                                 | 413.5  | 0.65  |                                       |  |  | FN3KRP       | 72.1                                  | 28.7  | 0.40 |                                       |  |  | FDFT1    | 154.2  | 433    | 2.81  |
| GFM1         | 100.5                                 | 5.7   | 0.06 |                                       |  |  | GALM         | 39                                    | 10.7   | 0.27  |                                       |  |  | FN3K         | 58.8                                  | 19.1  | 0.32 |                                       |  |  | FCSK     | 65.6   | 17.5   | 0.27  |
| GET4         | 124.7                                 | 97.3  | 0.78 |                                       |  |  | GALK2        | 109.5                                 | 34.9   | 0.32  |                                       |  |  | FN1          | 72.7                                  | 50.5  | 0.69 |                                       |  |  | FCHO2    | 195.4  | 154.3  | 0.79  |
| GEMIN6       | 1380.4                                | 536.2 | 0.39 |                                       |  |  | GALK1        | 65.5                                  | 31.1   | 0.47  |                                       |  |  | FMR1         | 144.2                                 | 65.7  | 0.46 |                                       |  |  | FCGR1    | 40.8   | 225.9  | 5.54  |
| GEMIN5       | 280.9                                 | 139.2 | 0.50 |                                       |  |  | GALE         | 166.4                                 | 24.4   | 0.15  |                                       |  |  | FMO5         | 50.2                                  | 104.2 | 2.08 |                                       |  |  | FBXO7    | 86.4   | 64.6   | 0.75  |
| GEMIN4       | 146.3                                 | 217.4 | 1.49 |                                       |  |  | GALC         | 106.9                                 | 213.7  | 2.00  |                                       |  |  | FMO4         | 40.1                                  | 97.8  | 2.44 |                                       |  |  | FBXO22   | 252.1  | 48.8   | 0.19  |
| GDPD3        | 17.2                                  | 49.1  | 2.85 |                                       |  |  | GAK          | 84.2                                  | 88.5   | 1.05  |                                       |  |  | FMO1         | 13.8                                  | 39    | 2.83 |                                       |  |  | FBXO21   | 88.5   | 89.4   | 1.01  |
| GDPD1        | 85.2                                  | 270.3 | 3.17 |                                       |  |  | GADD45GIP1   | 206.9                                 | 224    | 1.08  |                                       |  |  | FMNL2        | 180.2                                 | 657.2 | 3.65 |                                       |  |  | FBXL20   | 141.5  | 562.6  | 3.98  |
| GDI2         | 161.8                                 | 56.2  | 0.35 |                                       |  |  | GABPA        | 84.3                                  | 11.9   | 0.14  |                                       |  |  | FLVCR2       | 54                                    | 334.6 | 6.20 |                                       |  |  | FBP2     | 2.8    | 0.1    | 0.04  |
| GDI1         | 128.2                                 | 27.5  | 0.21 |                                       |  |  | GAA          | 129.4                                 | 117.7  | 0.91  |                                       |  |  | FLVCR1       | 116                                   | 575.5 | 4.96 |                                       |  |  | FBP1     | 6      | 4.1    | 0.68  |
| GDAP2        | 195                                   | 306.7 | 1.57 |                                       |  |  | G6PD         | 422.8                                 | 103.3  | 0.24  |                                       |  |  | FLRT3        | 104.4                                 | 434.4 | 4.16 |                                       |  |  | FBN1     | 3.6    | 7.8    | 2.17  |
| GDAP1        | 65.1                                  | 225.3 | 3.46 |                                       |  |  | G6PC3        | 158.4                                 | 554.5  | 3.50  |                                       |  |  | FLOT2        | 175                                   | 1198  | 6.85 |                                       |  |  | FBLN2    | 0.1    | 1      | 10.00 |
| GDA          | 235.7                                 | 65.4  | 0.28 |                                       |  |  | G3BP2        | 178.8                                 | 39.5   | 0.22  |                                       |  |  | FLOT1        | 189.6                                 | 1479  | 7.80 |                                       |  |  | FBLN1    | 18.4   | 10.6   | 0.58  |
| GDA          | 346.8                                 | 113.2 | 0.33 |                                       |  |  | G3BP1        | 238                                   | 38.1   | 0.16  |                                       |  |  | FLNC         | 131.3                                 | 71.6  | 0.55 |                                       |  |  | FBLN1    | 14.5   | 5.2    | 0.36  |
| GCSH         | 105.7                                 | 14.8  | 0.14 |                                       |  |  | FYTD1        | 511.7                                 | 891.7  | 1.74  |                                       |  |  | FLNB         | 89                                    | 26.1  | 0.29 |                                       |  |  | FBLM1    | 20.4   | 24.6   | 1.21  |
| GCN1         | 213.3                                 | 202.5 | 0.95 |                                       |  |  | FYN          | 39.2                                  | 50.5   | 1.29  |                                       |  |  | FLNA         | 56.6                                  | 17.7  | 0.31 |                                       |  |  | FBL      | 176.4  | 103.4  | 0.59  |
| GLCLM        | 101.6                                 | 36.6  | 0.36 |                                       |  |  | FYCO1        | 108.4                                 | 226.2  | 2.09  |                                       |  |  | FLJ45252     | 233.1                                 | 83.6  | 0.36 |                                       |  |  | FAT1     | 409.4  | 1074.7 | 2.63  |
| GLCL         | 108.5                                 | 29.7  | 0.27 |                                       |  |  | FXYD2        | 111.5                                 | 1300.4 | 11.66 |                                       |  |  | FLII         | 165.1                                 | 102.8 | 0.62 |                                       |  |  | FASTKD5  | 125.2  | 39     | 0.31  |
| GCHFR        | 48.6                                  | 19.6  | 0.40 |                                       |  |  | FXR2         | 129.2                                 | 74.1   | 0.57  |                                       |  |  | FLAD1        | 168.3                                 | 39.7  | 0.24 |                                       |  |  | FASN     | 3899.6 | 1197.5 | 0.31  |
| GCFC2        | 308.4                                 | 203.5 | 0.66 |                                       |  |  | FXR1         | 173.7                                 | 55.4   | 0.32  |                                       |  |  | FKBP9        | 198.9                                 | 173.6 | 0.87 |                                       |  |  | FAS      | 313.6  | 1387.8 | 4.43  |
| GCDH         | 76.9                                  | 6.6   | 0.09 |                                       |  |  | FUS          | 167.3                                 | 14.1   | 0.08  |                                       |  |  | FKBP8        | 82.7                                  | 191.3 | 2.31 |                                       |  |  | FAR5B    | 162.1  | 24.1   | 0.15  |
| GCC2         | 171.2                                 | 48.8  | 0.29 |                                       |  |  | FUNDC2       | 64.9                                  | 166.1  | 2.56  |                                       |  |  | FKBP7        | 192.4                                 | 271.3 | 1.41 |                                       |  |  | FARSA    | 194.6  | 28.4   | 0.15  |
| GCAT         | 667.9                                 | 120.5 | 0.18 |                                       |  |  | FUNDC1       | 84.2                                  | 138.2  | 1.64  |                                       |  |  | FKBP5        | 973.5                                 | 174.6 | 0.18 |                                       |  |  | FARS2    | 81.3   | 22.1   | 0.27  |
| GC           | 2.4                                   | 3.2   | 1.33 |                                       |  |  | FUCA2        | 308.4                                 | 150.3  | 0.49  |                                       |  |  | FKBP4        | 133.5                                 | 26.7  | 0.20 |                                       |  |  | FARP2    | 57.6   | 205.9  | 3.57  |
| GBP2         | 561.5                                 | 134.7 | 0.24 |                                       |  |  | FUCA1        | 148                                   | 85.1   | 0.58  |                                       |  |  | FKBP3        | 340.3                                 | 49    | 0.14 |                                       |  |  | FARP1    | 175.4  | 920.8  | 5.25  |
| GBP1         | 113.2                                 | 41.8  | 0.37 |                                       |  |  | FUBP3        | 213                                   | 71     | 0.33  |                                       |  |  | FKBP2        | 114.2                                 | 121.6 | 1.06 |                                       |  |  | FAR1     | 117.3  | 159.1  | 1.36  |
| GBF1         | 131.8                                 | 157.2 | 1.19 |                                       |  |  | FUBP1        | 190.9                                 | 22.7   | 0.12  |                                       |  |  | FKBP1A       | 161.2                                 | 90.6  | 0.56 |                                       |  |  | FAM98C   | 51.3   | 11.2   | 0.22  |
| GBE1         | 192.6                                 | 47.7  | 0.25 |                                       |  |  | FTSJ3        | 243.7                                 | 307.2  | 1.26  |                                       |  |  | FKBP15       | 103.3                                 | 88.9  | 0.86 |                                       |  |  | FAM98B   | 118.5  | 17.6   | 0.15  |
| GBA3         | 61.4                                  | 13.2  | 0.21 |                                       |  |  | FTSJ1        | 197.6                                 | 92.2   | 0.47  |                                       |  |  | FKBP11       | 65                                    | 134.4 | 2.07 |                                       |  |  | FAM98A   | 190.9  | 51.5   | 0.27  |
| GBA2         | 118.9                                 | 356.3 | 3.00 |                                       |  |  | FTO          | 212.8                                 | 32.4   | 0.15  |                                       |  |  | FKBP10       | 115.5                                 | 77.1  | 0.67 |                                       |  |  | FAM91A1  | 111.8  | 98.7   | 0.88  |
| GBA          | 207.9                                 | 543.3 | 2.61 |                                       |  |  | FTL          | 557.9                                 | 845.9  | 1.52  |                                       |  |  | FITM2        | 101.8                                 | 334.8 | 3.29 |                                       |  |  | FAM8A1   | 127.3  | 211.1  | 1.66  |
| GATM         | 2.6                                   | 1.3   | 0.50 |                                       |  |  | FTH1         | 603.4                                 | 809.8  | 1.34  |                                       |  |  | FIS1         | 70                                    | 135.1 | 1.93 |                                       |  |  | FAM50A   | 689.2  | 103.2  | 0.15  |
| GATD3B       | 56.9                                  | 3.3   | 0.06 |                                       |  |  | FTCD         | 13.1                                  | 4.3    | 0.33  |                                       |  |  | FIP1L1       | 280                                   | 67.7  | 0.24 |                                       |  |  | FAM49B   | 315.6  | 381.3  | 1.21  |
| GATD1        | 72.1                                  | 22.2  | 0.31 |                                       |  |  | FSCN1        | 126.4                                 | 41     | 0.32  |                                       |  |  | FIBP         | 78.9                                  | 163   | 2.07 |                                       |  |  | FAM3C    | 162.3  | 746.7  | 4.60  |
| GATAD2A      | 952.9                                 | 230.2 | 0.24 |                                       |  |  | FRYL         | 121.6                                 | 122.8  | 1.01  |                                       |  |  | FHL2         | 81.3                                  | 36.4  | 0.45 |                                       |  |  | FAM241A  | 63.4   | 67.4   | 1.06  |
| GART         | 409.4                                 | 125.7 | 0.31 |                                       |  |  | FRMD8        | 176.7                                 | 191.4  | 1.08  |                                       |  |  | FHL1         | 38.3                                  | 16.3  | 0.43 |                                       |  |  | FAM234A  | 92.5   | 617.1  | 6.67  |
| GARS1        | 404.5                                 | 78.7  | 0.19 |                                       |  |  | FRK          | 113.5                                 | 726    | 6.40  |                                       |  |  | FH           | 109.7                                 | 9     | 0.08 |                                       |  |  | FAM210B  | 129.7  | 647.9  | 5.00  |
| GAR1         | 124.3                                 | 31    | 0.25 |                                       |  |  | FREM2        | 8.7                                   | 13.5   | 1.55  |                                       |  |  | FGL2         | 11.2                                  | 9.2   | 0.82 |                                       |  |  | FAM210A  | 24     | 98.1   | 4.09  |
| GAPVD1       | 111.1                                 | 77.8  | 0.70 |                                       |  |  | FRAS1        | 21.4                                  | 17.7   | 0.83  |                                       |  |  | FGGY         | 55.5                                  | 18.6  | 0.34 |                                       |  |  | FAM177A1 | 73.4   | 371.9  | 5.07  |

Values are expressed as % of protein abundance in TL of human kidney cortex 1.



## Supplemental table 5 (Continued):

| Protein name | 3D RPTEC Spheroid_Lot.664995_day12_TL | 3D RPTEC Spheroid_Lot.664995_day12_PM | PM/TL ratio | Protein name | 3D RPTEC Spheroid_Lot.664995_day12_TL | 3D RPTEC Spheroid_Lot.664995_day12_PM | PM/TL ratio | Protein name | 3D RPTEC Spheroid_Lot.664995_day12_TL | 3D RPTEC Spheroid_Lot.664995_day12_PM | PM/TL ratio | Protein name | 3D RPTEC Spheroid_Lot.664995_day12_TL | 3D RPTEC Spheroid_Lot.664995_day12_PM | PM/TL ratio |
|--------------|---------------------------------------|---------------------------------------|-------------|--------------|---------------------------------------|---------------------------------------|-------------|--------------|---------------------------------------|---------------------------------------|-------------|--------------|---------------------------------------|---------------------------------------|-------------|
| FAM171A1     | 184.8                                 | 856.7                                 | 4.64        | ESYT2        | 150.4                                 | 401.7                                 | 2.67        | ENPP5        | 487.1                                 | 427.5                                 | 0.88        | EIF4E        | 200.3                                 | 111.1                                 | 0.55        |
| FAM162A      | 97.4                                  | 389.1                                 | 3.99        | ESYT1        | 172.4                                 | 443.4                                 | 2.57        | ENPP4        | 134.5                                 | 550.1                                 | 4.09        | EIF4B        | 613.7                                 | 59.8                                  | 0.10        |
| FAM160B1     | 92.8                                  | 49.2                                  | 0.53        | ESYT1        | 298.9                                 | 675.7                                 | 2.26        | ENPP3        | 201.1                                 | 1099.5                                | 5.47        | EIF4A3       | 115                                   | 96.9                                  | 0.84        |
| FAM151A      | 12.3                                  | 14                                    | 1.14        | ESPN         | 59.8                                  | 57                                    | 0.95        | ENPP1        | 133.1                                 | 664.3                                 | 4.99        | EIF4A2       | 108.7                                 | 25.8                                  | 0.24        |
| FAM126B      | 87                                    | 406.8                                 | 4.68        | ESD          | 166.2                                 | 26.5                                  | 0.16        | ENPEP        | 148                                   | 846.8                                 | 5.72        | EIF4A1       | 198.4                                 | 53.7                                  | 0.27        |
| FAM126A      | 164.3                                 | 837.1                                 | 5.09        | ESAM         | 5.3                                   | 3.9                                   | 0.74        | ENOSF1       | 59                                    | 14.8                                  | 0.25        | EIF3M        | 176.5                                 | 50                                    | 0.28        |
| FAM120B      | 120.1                                 | 41.2                                  | 0.34        | ERP44        | 101.7                                 | 200.1                                 | 1.97        | ENOPH1       | 138.7                                 | 66.6                                  | 0.48        | EIF3L        | 172.8                                 | 53.4                                  | 0.31        |
| FAM120A      | 174.7                                 | 83.8                                  | 0.48        | ERP29        | 146.3                                 | 147.7                                 | 1.01        | ENO3         | 39.4                                  | 19.7                                  | 0.50        | EIF3K        | 179.6                                 | 54.1                                  | 0.30        |
| FAHD2A       | 232.6                                 | 34.7                                  | 0.15        | ERO1A        | 193.5                                 | 110.2                                 | 0.57        | ENO2         | 391.3                                 | 106.6                                 | 0.27        | EIF3J        | 205.9                                 | 59.5                                  | 0.29        |
| FAHD1        | 77.2                                  | 6.7                                   | 0.09        | ERMP1        | 122.4                                 | 434.9                                 | 3.55        | ENO1         | 283.4                                 | 61.8                                  | 0.22        | EIF3I        | 220.8                                 | 122.7                                 | 0.56        |
| FAH          | 74.4                                  | 17.1                                  | 0.23        | ERLIN2       | 60                                    | 233.5                                 | 3.89        | ENG          | 14.3                                  | 21.3                                  | 1.49        | EIF3H        | 221.5                                 | 77.8                                  | 0.35        |
| FAF2         | 130.8                                 | 466.8                                 | 3.57        | ERLIN1       | 55                                    | 188.7                                 | 3.43        | ENDOG        | 293.9                                 | 136                                   | 0.46        | EIF3G        | 225                                   | 107.4                                 | 0.48        |
| FAF1         | 202.6                                 | 177.8                                 | 0.88        | ERLEC1       | 126.7                                 | 455.3                                 | 3.59        | ENDOD1       | 92.1                                  | 239.6                                 | 2.60        | EIF3F        | 156.5                                 | 79.9                                  | 0.51        |
| FADS2        | 1035.8                                | 4521                                  | 4.36        | ERIS         | 132                                   | 30.8                                  | 0.23        | ENAH         | 184.5                                 | 68                                    | 0.37        | EIF3E        | 171.3                                 | 74.3                                  | 0.43        |
| FADS1        | 301.5                                 | 954.9                                 | 3.17        | ERGIC3       | 145.1                                 | 367.4                                 | 2.53        | EML4         | 155.5                                 | 61.6                                  | 0.40        | EIF3D        | 213.5                                 | 56.2                                  | 0.26        |
| FABP1        | 26.9                                  | 6.1                                   | 0.23        | ERGIC2       | 141.4                                 | 512.4                                 | 3.62        | EML2         | 173.4                                 | 56.6                                  | 0.33        | EIF3CL       | 197.7                                 | 105.7                                 | 0.53        |
| FAAH         | 53.1                                  | 208.7                                 | 3.93        | ERGIC1       | 96.4                                  | 398.3                                 | 4.13        | EML1         | 69                                    | 17                                    | 0.25        | EIF3B        | 205.2                                 | 119.5                                 | 0.58        |
| FAZH         | 108.2                                 | 448.7                                 | 4.15        | ERCC2        | 152.1                                 | 75.2                                  | 0.49        | EMILIN1      | 11.9                                  | 2.9                                   | 0.24        | EIF3A        | 195.4                                 | 141.5                                 | 0.72        |
| F9           | 2.9                                   | 5.2                                   | 1.79        | ERC1         | 110.5                                 | 31                                    | 0.28        | EMG1         | 168.6                                 | 84.1                                  | 0.50        | EIF2S3       | 199                                   | 45.2                                  | 0.23        |
| F3           | 29.5                                  | 12.8                                  | 0.43        | ERBIN        | 126.4                                 | 485.8                                 | 3.84        | EMD          | 139.5                                 | 303.6                                 | 2.18        | EIF2S2       | 228.5                                 | 36.3                                  | 0.16        |
| F2           | 11.7                                  | 6.3                                   | 0.54        | ERBB2        | 94.6                                  | 629.9                                 | 6.66        | EMCN         | 6.4                                   | 7.5                                   | 1.17        | EIF2S1       | 201.7                                 | 34.1                                  | 0.17        |
| F13A1        | 4                                     | 1.9                                   | 0.48        | ERAP1        | 121.6                                 | 89                                    | 0.73        | EMC8         | 141.2                                 | 479.9                                 | 3.40        | EIF2D        | 220.4                                 | 64.2                                  | 0.29        |
| F11R         | 111.5                                 | 664.8                                 | 5.96        | EPS8L2       | 114                                   | 127.7                                 | 1.12        | EMC7         | 117.3                                 | 408.9                                 | 3.49        | EIF2B5       | 202.7                                 | 98.9                                  | 0.49        |
| EZR          | 135                                   | 149.7                                 | 1.11        | EPS8         | 191                                   | 776.9                                 | 4.07        | EMC4         | 105.3                                 | 641.8                                 | 6.09        | EIF2B4       | 181.1                                 | 128                                   | 0.71        |
| EXTL3        | 142.1                                 | 532                                   | 3.74        | EPS15L1      | 161.6                                 | 56.4                                  | 0.35        | EMC3         | 131                                   | 496                                   | 3.79        | EIF2B3       | 173.2                                 | 113                                   | 0.65        |
| EXTL2        | 95                                    | 161.8                                 | 1.70        | EPS15        | 130                                   | 48.3                                  | 0.37        | EMC2         | 113.6                                 | 381.3                                 | 3.36        | EIF2B2       | 201.9                                 | 45.8                                  | 0.23        |
| EXOSC9       | 104.2                                 | 23.1                                  | 0.22        | EPSR1        | 219.4                                 | 96.8                                  | 0.44        | EMC10        | 167.6                                 | 408.6                                 | 2.44        | EIF2B1       | 233.8                                 | 61.2                                  | 0.26        |
| EXOSC7       | 96                                    | 8.7                                   | 0.09        | EPPK1        | 146.7                                 | 64.6                                  | 0.44        | EMC1         | 112.2                                 | 362.3                                 | 3.23        | EIF2AK2      | 121.6                                 | 27.8                                  | 0.23        |
| EXOSC6       | 135.7                                 | 43.3                                  | 0.32        | EPN1         | 116.6                                 | 103.1                                 | 0.88        | EMB          | 50.9                                  | 193.3                                 | 3.80        | EIF2A        | 133.8                                 | 69                                    | 0.52        |
| EXOSC5       | 187.5                                 | 47.9                                  | 0.26        | EPM2AIP1     | 76.1                                  | 27.4                                  | 0.36        | ELP3         | 153                                   | 82                                    | 0.54        | EIF1AX       | 202.8                                 | 32.2                                  | 0.16        |
| EXOSC3       | 129.5                                 | 11.7                                  | 0.09        | EPHX2        | 23                                    | 3.9                                   | 0.17        | ELP2         | 54.9                                  | 27.3                                  | 0.50        | EIF1         | 129                                   | 15.7                                  | 0.12        |
| EXOSC10      | 101.5                                 | 69.6                                  | 0.69        | EPHX1        | 55.4                                  | 188.6                                 | 3.40        | ELP1         | 92.1                                  | 43.2                                  | 0.47        | EHHADH       | 39.8                                  | 10.2                                  | 0.26        |
| EXOG         | 95.3                                  | 600.9                                 | 6.31        | EPHB4        | 42.5                                  | 158.7                                 | 3.73        | ELOVL4       | 66.2                                  | 52.2                                  | 0.79        | EHD4         | 52.7                                  | 71.6                                  | 1.36        |
| EXOC8        | 209.3                                 | 143.8                                 | 0.69        | EPHA7        | 140.9                                 | 1116.4                                | 7.92        | ELOVL1       | 231.2                                 | 750.4                                 | 3.25        | EHD3         | 15                                    | 16                                    | 1.07        |
| EXOC7        | 182.9                                 | 103.1                                 | 0.56        | EPHA2        | 213.5                                 | 1520.8                                | 7.12        | ELOC         | 192.3                                 | 78.7                                  | 0.41        | EHD2         | 73.6                                  | 114.1                                 | 1.55        |
| EXOC6B       | 172.3                                 | 119.6                                 | 0.69        | EPDR1        | 289.8                                 | 167.7                                 | 0.58        | ELOB         | 205.3                                 | 78.8                                  | 0.38        | EHD1         | 121.7                                 | 174.5                                 | 1.43        |
| EXOC6        | 212.1                                 | 159.9                                 | 0.75        | EPCAM        | 139.3                                 | 890.4                                 | 6.39        | ELN          | 7.6                                   | 14.5                                  | 1.91        | EHBP1        | 218.7                                 | 222.3                                 | 1.02        |
| EXOC5        | 169.4                                 | 121.7                                 | 0.72        | EPB42        | 63.8                                  | 74.7                                  | 1.17        | ELMOD2       | 95.2                                  | 387.4                                 | 4.07        | EGFR         | 85.4                                  | 768.3                                 | 9.00        |
| EXOC4        | 177.5                                 | 149.7                                 | 0.84        | EPB41L5      | 158.5                                 | 586.1                                 | 3.70        | ELMO2        | 84.1                                  | 63                                    | 0.75        | EFTUD2       | 144.4                                 | 105.7                                 | 0.73        |
| EXOC3        | 154.4                                 | 135.2                                 | 0.88        | EPB41L3      | 47.1                                  | 161.5                                 | 3.43        | ELAVL1       | 248.2                                 | 44.2                                  | 0.18        | EFR3A        | 142.5                                 | 697.7                                 | 4.90        |
| EXOC2        | 165.4                                 | 151.8                                 | 0.92        | EPB41L2      | 75                                    | 187.6                                 | 2.50        | ELAC2        | 171.2                                 | 29.6                                  | 0.17        | EFNB1        | 64.6                                  | 353.9                                 | 5.48        |
| EXOC1        | 196.5                                 | 129.4                                 | 0.66        | EPB41L1      | 111.6                                 | 280.8                                 | 2.52        | EIF6         | 210.1                                 | 58.4                                  | 0.28        | EFL1         | 220.1                                 | 69.2                                  | 0.31        |
| EXD2         | 164.8                                 | 405.4                                 | 2.46        | EPB41L1      | 118.5                                 | 324.6                                 | 2.74        | EIF5B        | 296.4                                 | 92                                    | 0.31        | EFHD2        | 136                                   | 48.4                                  | 0.36        |
| EWSR1        | 219.5                                 | 23.1                                  | 0.11        | EPB41        | 132                                   | 570.3                                 | 4.32        | EIF5A        | 267.3                                 | 49.5                                  | 0.19        | EFHD1        | 83.8                                  | 64.9                                  | 0.77        |
| EVPL         | 248                                   | 98.9                                  | 0.40        | EP300        | 118.4                                 | 187.1                                 | 1.58        | EIF5         | 141.9                                 | 28.2                                  | 0.20        | EFEMP1       | 2.7                                   | 1.2                                   | 0.44        |
| ETHE1        | 187.1                                 | 18.9                                  | 0.10        | ENTPD5       | 48.5                                  | 28.4                                  | 0.59        | EIF4H        | 207.6                                 | 13.7                                  | 0.07        | EFCAB14      | 140.4                                 | 648                                   | 4.62        |
| ETFDH        | 38                                    | 108                                   | 2.84        | ENTPD4       | 153.5                                 | 552.8                                 | 3.60        | EIF4G3       | 160.5                                 | 55.4                                  | 0.35        | EEFSEC       | 65.5                                  | 24.4                                  | 0.37        |
| ETFB         | 65.6                                  | 8.9                                   | 0.14        | ENTPD2       | 27.6                                  | 261.7                                 | 9.48        | EIF4G2       | 110.8                                 | 60.2                                  | 0.54        | EEF2         | 437.5                                 | 100.8                                 | 0.23        |
| ETFA         | 67.1                                  | 5.6                                   | 0.08        | ENTPD1       | 15.2                                  | 18.3                                  | 1.20        | EIF4G1       | 227.7                                 | 96.5                                  | 0.42        | EEF1G        | 199.3                                 | 45.2                                  | 0.23        |
| ETF1         | 214.6                                 | 61.8                                  | 0.29        | ENPP6        | 8.8                                   | 27.7                                  | 3.15        | EIF4E2       | 116.3                                 | 41.2                                  | 0.35        | EEF1E1       | 247.3                                 | 50                                    | 0.20        |

Values are expressed as % of protein abundance in TL of human kidney cortex 1.

## Supplemental table 5 (Continued):

| Protein name | 3D RPTEC Spheroid_Lot.664995_day12_TL | 3D RPTEC Spheroid_Lot.664995_day12_PM | PM/TL ratio | Protein name | 3D RPTEC Spheroid_Lot.664995_day12_TL | 3D RPTEC Spheroid_Lot.664995_day12_PM | PM/TL ratio | Protein name | 3D RPTEC Spheroid_Lot.664995_day12_TL | 3D RPTEC Spheroid_Lot.664995_day12_PM | PM/TL ratio | Protein name | 3D RPTEC Spheroid_Lot.664995_day12_TL | 3D RPTEC Spheroid_Lot.664995_day12_PM | PM/TL ratio |
|--------------|---------------------------------------|---------------------------------------|-------------|--------------|---------------------------------------|---------------------------------------|-------------|--------------|---------------------------------------|---------------------------------------|-------------|--------------|---------------------------------------|---------------------------------------|-------------|
| EEF1D        | 177                                   | 20.6                                  | 0.12        | DRG1         | 126.7                                 | 43.1                                  | 0.34        | DLGAP4       | 303.6                                 | 514.9                                 | 1.70        | DDX58        | 152.5                                 | 87.3                                  | 0.57        |
| EEF1B2       | 119.5                                 | 13.6                                  | 0.11        | DPYSL3       | 49.1                                  | 19.3                                  | 0.39        | DLG4         | 237.4                                 | 44.4                                  | 0.19        | DDX54        | 86.9                                  | 48.5                                  | 0.56        |
| EEF1AKNMT    | 475.4                                 | 0.1                                   | 0.00        | DPYSL2       | 94.7                                  | 24.4                                  | 0.26        | DLG1         | 175.4                                 | 726.9                                 | 4.14        | DDX50        | 216.2                                 | 183                                   | 0.85        |
| EEF1A1       | 190                                   | 38.4                                  | 0.20        | DPYS         | 19.1                                  | 11                                    | 0.58        | DLD          | 89.7                                  | 16.6                                  | 0.19        | DDX5         | 164.5                                 | 73.3                                  | 0.45        |
| EEA1         | 279.1                                 | 53.5                                  | 0.19        | DPY19L1      | 136.6                                 | 486.4                                 | 3.56        | DLAT         | 128.5                                 | 39.5                                  | 0.31        | DDX46        | 136.7                                 | 63.1                                  | 0.46        |
| EDIL3        | 95.6                                  | 410.9                                 | 4.30        | DPT          | 1.8                                   | 0.1                                   | 0.06        | DKC1         | 149.3                                 | 63.7                                  | 0.43        | DDX42        | 129.6                                 | 27.3                                  | 0.21        |
| EDF1         | 366.7                                 | 70.1                                  | 0.19        | DPP9         | 251                                   | 116.6                                 | 0.46        | DIS3L2       | 136.2                                 | 27.8                                  | 0.20        | DDX41        | 144.5                                 | 114.2                                 | 0.79        |
| EDEM3        | 102.5                                 | 164.6                                 | 1.61        | DPP7         | 171                                   | 83.3                                  | 0.49        | DIS3         | 170.7                                 | 37.3                                  | 0.22        | DDX3X        | 144.6                                 | 79.2                                  | 0.55        |
| EDC4         | 166.6                                 | 137.3                                 | 0.82        | DPP4         | 161.2                                 | 1004.4                                | 6.23        | DIPK2A       | 80                                    | 148.8                                 | 1.86        | DDX39B       | 189.9                                 | 25.7                                  | 0.14        |
| EDC3         | 159.9                                 | 54.4                                  | 0.34        | DPP3         | 427.9                                 | 91                                    | 0.21        | DIP2C        | 108.5                                 | 145.9                                 | 1.34        | DDX39A       | 150.9                                 | 22.4                                  | 0.15        |
| ECSIT        | 163.5                                 | 614.3                                 | 3.76        | DPM1         | 105.7                                 | 328.1                                 | 3.10        | DI01         | 32.3                                  | 80.2                                  | 2.48        | DDX28        | 183.9                                 | 120.5                                 | 0.66        |
| ECPAS        | 164.9                                 | 84.9                                  | 0.51        | DPH5         | 305.3                                 | 30.2                                  | 0.10        | DICER1       | 128.4                                 | 109.3                                 | 0.85        | DDX27        | 249.1                                 | 297.3                                 | 1.19        |
| ECI2         | 51.2                                  | 8.9                                   | 0.17        | DPEP1        | 74.8                                  | 465.5                                 | 6.22        | DIAPH2       | 232.8                                 | 172.5                                 | 0.74        | DDX24        | 190.8                                 | 189.6                                 | 0.99        |
| ECI1         | 105.3                                 | 5.8                                   | 0.06        | DOCK9        | 92.6                                  | 94.8                                  | 1.02        | DIAPH1       | 200.3                                 | 138.3                                 | 0.69        | DDX23        | 129.8                                 | 12.5                                  | 0.10        |
| ECHS1        | 54.3                                  | 3.4                                   | 0.06        | DOCK7        | 146.2                                 | 117.2                                 | 0.80        | DIABLO       | 184.5                                 | 184                                   | 1.00        | DDX21        | 240.6                                 | 212.3                                 | 0.88        |
| ECHDC3       | 43.9                                  | 3.3                                   | 0.08        | DOCK1        | 61.5                                  | 70.6                                  | 1.15        | DHX9         | 118.5                                 | 48.8                                  | 0.41        | DDX20        | 333.1                                 | 347.1                                 | 1.04        |
| ECHDC2       | 10.8                                  | 5.1                                   | 0.47        | DNPH1        | 93.4                                  | 21.1                                  | 0.23        | DHX40        | 131.6                                 | 36.8                                  | 0.28        | DDX19B       | 238.6                                 | 123.7                                 | 0.52        |
| ECHDC1       | 105                                   | 28.5                                  | 0.27        | DNPEP        | 85                                    | 20                                    | 0.24        | DHX32        | 143.6                                 | 156.7                                 | 1.09        | DDX19A       | 153.5                                 | 66.1                                  | 0.43        |
| ECH1         | 60.2                                  | 8.4                                   | 0.14        | DNMBP        | 118.4                                 | 76.1                                  | 0.64        | DHX30        | 186.5                                 | 124.8                                 | 0.67        | DDX18        | 95.7                                  | 65.3                                  | 0.68        |
| ECE1         | 147                                   | 815.8                                 | 5.55        | DNM2         | 120.9                                 | 101.8                                 | 0.84        | DHX29        | 132.7                                 | 35.5                                  | 0.27        | DDX17        | 119.7                                 | 31.9                                  | 0.27        |
| ECD          | 225.4                                 | 56.6                                  | 0.25        | DNM1L        | 241.4                                 | 175.6                                 | 0.73        | DHX16        | 103.1                                 | 44.5                                  | 0.43        | DDX1         | 133.3                                 | 27.6                                  | 0.21        |
| EBNA1BP2     | 220.3                                 | 501.9                                 | 2.28        | DNM1         | 157.2                                 | 107                                   | 0.68        | DHX15        | 162.4                                 | 66.9                                  | 0.41        | DDT          | 122.8                                 | 30.5                                  | 0.25        |
| EBAG9        | 107.6                                 | 341.2                                 | 3.17        | DNASE2       | 216.6                                 | 97.9                                  | 0.45        | DHTKD1       | 109.6                                 | 7.9                                   | 0.07        | DDRGK1       | 82.3                                  | 154.6                                 | 1.88        |
| DYSF         | 30.3                                  | 144.1                                 | 4.76        | DNAJC9       | 152                                   | 144.8                                 | 0.95        | DHR5X        | 47.5                                  | 159.5                                 | 3.36        | DDR1         | 164                                   | 859                                   | 5.24        |
| DYNLT3       | 48.9                                  | 24.9                                  | 0.51        | DNAJC8       | 162.2                                 | 34.9                                  | 0.22        | DHRS7B       | 72.7                                  | 240.3                                 | 3.31        | DDOST        | 89                                    | 301.7                                 | 3.39        |
| DYNLT1       | 223.7                                 | 34.8                                  | 0.16        | DNAJC7       | 149.8                                 | 178                                   | 1.19        | DHRS7        | 133.2                                 | 404.2                                 | 3.03        | DDI2         | 153.3                                 | 62.6                                  | 0.41        |
| DYNLRB1      | 148.9                                 | 23.5                                  | 0.16        | DNAJC5       | 112.4                                 | 770.4                                 | 6.85        | DHRS4        | 33.5                                  | 5.6                                   | 0.17        | DDC          | 4.9                                   | 3.8                                   | 0.78        |
| DYNLL2       | 63.6                                  | 23.5                                  | 0.37        | DNAJC3       | 116.1                                 | 146.8                                 | 1.26        | DHRS3        | 42.9                                  | 162.4                                 | 3.79        | DDB1         | 158.1                                 | 72.6                                  | 0.46        |
| DYNLL1       | 145.5                                 | 59.2                                  | 0.41        | DNAJC19      | 87.3                                  | 388.1                                 | 4.45        | DHRS11       | 75.8                                  | 4.8                                   | 0.06        | DDAH2        | 82.2                                  | 67.9                                  | 0.83        |
| DYNCL1I2     | 157.3                                 | 68.7                                  | 0.44        | DNAJC16      | 106.5                                 | 358.6                                 | 3.37        | DHRS1        | 25.3                                  | 79.5                                  | 3.14        | DDAH1        | 44.6                                  | 16                                    | 0.36        |
| DYNCL1I1     | 214                                   | 103.8                                 | 0.49        | DNAJC13      | 106.3                                 | 207                                   | 1.95        | DHODH        | 47.3                                  | 161.7                                 | 3.42        | DCXR         | 66.4                                  | 10.6                                  | 0.16        |
| DYNCL1I2     | 148.3                                 | 49                                    | 0.33        | DNAJC11      | 61.4                                  | 169.1                                 | 2.75        | DHCR7        | 380.4                                 | 1471.8                                | 3.87        | DCTN4        | 119.2                                 | 40.9                                  | 0.34        |
| DYNCL1H1     | 127.7                                 | 113.3                                 | 0.89        | DNAJC10      | 178.7                                 | 323.7                                 | 1.81        | DHCR24       | 99.3                                  | 160.7                                 | 1.62        | DCTN3        | 163.9                                 | 120.7                                 | 0.74        |
| DUT          | 140                                   | 48.4                                  | 0.35        | DNAJC1       | 165.4                                 | 440.3                                 | 2.66        | DGLUCY       | 1269.2                                | 161.3                                 | 0.13        | DCTN2        | 132.7                                 | 44.6                                  | 0.34        |
| DUSP3        | 163.7                                 | 44.6                                  | 0.27        | DNAJB6       | 91.6                                  | 202.7                                 | 2.21        | DGKE         | 34.2                                  | 76.5                                  | 2.24        | DCTN1        | 151.7                                 | 82                                    | 0.54        |
| DUSP23       | 103.5                                 | 32.5                                  | 0.31        | DNAJB2       | 66.6                                  | 111.5                                 | 1.67        | DFFA         | 144.1                                 | 23.1                                  | 0.16        | DCTD         | 277.9                                 | 41.8                                  | 0.15        |
| DUS3L        | 270.1                                 | 193                                   | 0.71        | DNAJB14      | 141.1                                 | 501.2                                 | 3.55        | DERL2        | 86.9                                  | 390.2                                 | 4.49        | DCPS         | 86.2                                  | 6.4                                   | 0.07        |
| DUS1L        | 196.6                                 | 107.8                                 | 0.55        | DNAJB12      | 57.9                                  | 328.1                                 | 5.67        | DERA         | 117.9                                 | 79.6                                  | 0.68        | DCP1A        | 151.1                                 | 53.4                                  | 0.35        |
| DTYMK        | 156.8                                 | 54                                    | 0.34        | DNAJB11      | 107.1                                 | 188.5                                 | 1.76        | DEPTOR       | 139                                   | 109.9                                 | 0.79        | DCN          | 2.2                                   | 1.6                                   | 0.73        |
| DTX3L        | 125.9                                 | 78.1                                  | 0.62        | DNAJB1       | 215.7                                 | 114.8                                 | 0.53        | DEPDC5       | 139.9                                 | 109.5                                 | 0.78        | DCK          | 281.8                                 | 36.5                                  | 0.13        |
| DTNBP1       | 261.5                                 | 99.6                                  | 0.38        | DNAJA3       | 82.9                                  | 45.8                                  | 0.55        | DENR         | 227.9                                 | 37.8                                  | 0.17        | DCBLD2       | 1290                                  | 7125.8                                | 5.52        |
| DTNB         | 73.3                                  | 267.5                                 | 3.65        | DNAJA2       | 115.7                                 | 157.6                                 | 1.36        | DENND4C      | 105.5                                 | 106.8                                 | 1.01        | DCAKD        | 73.6                                  | 324.4                                 | 4.41        |
| DTNA         | 154.4                                 | 490.2                                 | 3.17        | DNAJA1       | 110.1                                 | 169.5                                 | 1.54        | DENND11      | 75.3                                  | 321.2                                 | 4.27        | DCAF8        | 149                                   | 60.1                                  | 0.40        |
| DTD1         | 174.2                                 | 20.5                                  | 0.12        | DNAAF5       | 269.2                                 | 320.9                                 | 1.19        | DENND10      | 105.4                                 | 94.9                                  | 0.90        | DCAF7        | 124.3                                 | 105.9                                 | 0.85        |
| DSTN         | 144.4                                 | 39.2                                  | 0.27        | DMXL1        | 112                                   | 173.2                                 | 1.55        | DEK          | 132                                   | 17.8                                  | 0.13        | DCAF11       | 144                                   | 86.2                                  | 0.60        |
| DST          | 82.3                                  | 75.2                                  | 0.91        | DMTN         | 171.5                                 | 46.2                                  | 0.27        | DEGS1        | 127.8                                 | 442                                   | 3.46        | DCAF1        | 153.7                                 | 53.9                                  | 0.35        |
| DSP          | 104.7                                 | 63.2                                  | 0.60        | DMGDH        | 18.4                                  | 5.9                                   | 0.32        | DECR2        | 204.3                                 | 58.7                                  | 0.29        | DBT          | 52.8                                  | 9.3                                   | 0.18        |
| DSG2         | 173.4                                 | 699.6                                 | 4.03        | DMD          | 85.1                                  | 157.4                                 | 1.85        | DECR1        | 74.6                                  | 7.8                                   | 0.10        | DBNL         | 174.3                                 | 50.5                                  | 0.29        |
| DSG1         | 86.5                                  | 133.5                                 | 1.54        | DMAC2        | 174.1                                 | 429.6                                 | 2.47        | DDX60        | 98.6                                  | 17.5                                  | 0.18        | DBN1         | 193.6                                 | 118.9                                 | 0.61        |
| DRG2         | 152                                   | 45.3                                  | 0.30        | DLST         | 107.2                                 | 30.4                                  | 0.28        | DDX6         | 223                                   | 132.4                                 | 0.59        | DBI          | 196.4                                 | 52.6                                  | 0.27        |

Values are expressed as % of protein abundance in TL of human kidney cortex 1.

## Supplemental table 5 (Continued):

| Protein name | 3D RPTEC Spheroid_Lot.664995_day12_TL | 3D RPTEC Spheroid_Lot.664995_day12_PM | PM/TL ratio | Protein name | 3D RPTEC Spheroid_Lot.664995_day12_TL | 3D RPTEC Spheroid_Lot.664995_day12_PM | PM/TL ratio | Protein name | 3D RPTEC Spheroid_Lot.664995_day12_TL | 3D RPTEC Spheroid_Lot.664995_day12_PM | PM/TL ratio | Protein name | 3D RPTEC Spheroid_Lot.664995_day12_TL | 3D RPTEC Spheroid_Lot.664995_day12_PM | PM/TL ratio |
|--------------|---------------------------------------|---------------------------------------|-------------|--------------|---------------------------------------|---------------------------------------|-------------|--------------|---------------------------------------|---------------------------------------|-------------|--------------|---------------------------------------|---------------------------------------|-------------|
| DAZAP1       | 233.3                                 | 8.5                                   | 0.04        | CTPS2        | 156.6                                 | 38.7                                  | 0.25        | CPSF7        | 112.1                                 | 18.2                                  | 0.16        | COPE         | 148.7                                 | 79.6                                  | 0.54        |
| DARS2        | 90.3                                  | 5.8                                   | 0.06        | CTPS1        | 560.7                                 | 220.4                                 | 0.39        | CPSF6        | 189.7                                 | 17                                    | 0.09        | COPB2        | 137.1                                 | 73.8                                  | 0.54        |
| DARS1        | 215.2                                 | 66.1                                  | 0.31        | CTNND1       | 77.6                                  | 323.6                                 | 4.17        | CPSF3        | 115.3                                 | 31.5                                  | 0.27        | COPB1        | 133.6                                 | 98.8                                  | 0.74        |
| DAFK3        | 92.9                                  | 35.6                                  | 0.38        | CTNND1       | 108.8                                 | 54.3                                  | 0.50        | CPSF1        | 136.5                                 | 45.4                                  | 0.33        | COPA         | 123.9                                 | 109.9                                 | 0.89        |
| DAP3         | 198.3                                 | 78.3                                  | 0.39        | CTNNB1       | 95.7                                  | 453.7                                 | 4.74        | CPQ          | 15.6                                  | 9.8                                   | 0.63        | COMTD1       | 108.3                                 | 317.3                                 | 2.93        |
| DAO          | 0.9                                   | 1.4                                   | 1.56        | CTNNAL1      | 225.8                                 | 648                                   | 2.87        | CPED1        | 172.2                                 | 60.1                                  | 0.35        | COMT         | 114.6                                 | 323.5                                 | 2.82        |
| DAGLB        | 346.3                                 | 2200.1                                | 6.35        | CTNNA2       | 104.4                                 | 582.3                                 | 5.58        | CPOX         | 321                                   | 132.9                                 | 0.41        | COMMDD9      | 126.8                                 | 108.4                                 | 0.85        |
| DAG1         | 102.1                                 | 317                                   | 3.10        | CTNNA1       | 102.2                                 | 402.7                                 | 3.94        | CPNE8        | 33.2                                  | 368.6                                 | 11.10       | COMMDD8      | 106.6                                 | 94.5                                  | 0.89        |
| DAB2         | 62                                    | 43.2                                  | 0.70        | CTH          | 137.7                                 | 42.4                                  | 0.31        | CPNE6        | 10.6                                  | 12.3                                  | 1.16        | COMMDD7      | 96.1                                  | 119.6                                 | 1.24        |
| DAAM1        | 65.5                                  | 173.7                                 | 2.65        | CTDP1        | 94.9                                  | 103.6                                 | 1.09        | CPNE3        | 128.8                                 | 95.3                                  | 0.74        | COMMDD6      | 93.4                                  | 83.8                                  | 0.90        |
| D2HGDH       | 50.6                                  | 11                                    | 0.22        | CTCF         | 76                                    | 44.7                                  | 0.59        | CPNE2        | 58.6                                  | 60                                    | 1.02        | COMMDD4      | 123.7                                 | 112.8                                 | 0.91        |
| CZIB         | 140.2                                 | 48.8                                  | 0.35        | CTBS         | 97.4                                  | 54                                    | 0.55        | CPNE1        | 117.1                                 | 24.8                                  | 0.21        | COMMDD3      | 143.3                                 | 113.9                                 | 0.79        |
| CYTH2        | 62.7                                  | 189.6                                 | 3.02        | CTBP2        | 175.5                                 | 28.6                                  | 0.16        | CPM          | 206.5                                 | 1372.9                                | 6.65        | COMMDD2      | 128.8                                 | 237                                   | 1.84        |
| CYP51A1      | 185.3                                 | 572.8                                 | 3.09        | CTBP1        | 137.9                                 | 40.7                                  | 0.30        | CPEB4        | 124.9                                 | 81.2                                  | 0.65        | COLGALT1     | 138.2                                 | 176.7                                 | 1.28        |
| CYP4F2       | 7.9                                   | 17.6                                  | 2.23        | CSTF3        | 150.9                                 | 53.9                                  | 0.36        | CPD          | 475.5                                 | 2814.5                                | 5.92        | COL6A3       | 3.2                                   | 3.7                                   | 1.16        |
| CYP4A22      | 32.9                                  | 12.7                                  | 0.39        | CSTB         | 235.8                                 | 79.7                                  | 0.34        | CP           | 10.6                                  | 32.1                                  | 3.03        | COL6A2       | 2                                     | 1.6                                   | 0.80        |
| CYP4A11      | 4.7                                   | 6.6                                   | 1.40        | CST3         | 194.8                                 | 177.3                                 | 0.91        | COX7C        | 169.3                                 | 277.6                                 | 1.64        | COL6A1       | 2.8                                   | 3.5                                   | 1.25        |
| CYP27A1      | 85.5                                  | 202.5                                 | 2.37        | CSR2         | 9.6                                   | 2.1                                   | 0.22        | COX7A2L      | 33                                    | 179.8                                 | 5.45        | COL4A6       | 4.2                                   | 6.1                                   | 1.45        |
| CYP20A1      | 52.1                                  | 170.4                                 | 3.27        | CSR1         | 34.3                                  | 9.1                                   | 0.27        | COX7A2       | 53.4                                  | 97.5                                  | 1.83        | COL4A5       | 7                                     | 0.1                                   | 0.01        |
| CYP17A1      | 34.1                                  | 37.2                                  | 1.09        | CSNK2A2      | 127.9                                 | 84                                    | 0.66        | COX7A1       | 27.8                                  | 51.1                                  | 1.84        | COL4A4       | 2.6                                   | 1.5                                   | 0.58        |
| CYFIP2       | 57.5                                  | 86.7                                  | 1.51        | CSNK2A1      | 113.3                                 | 51.5                                  | 0.45        | COX6C        | 44.2                                  | 137.2                                 | 3.10        | COL4A3       | 4.1                                   | 3.4                                   | 0.83        |
| CYFIP1       | 122.4                                 | 223.6                                 | 1.83        | CSNK1G3      | 120.6                                 | 776.5                                 | 6.44        | COX6B1       | 47.1                                  | 54.5                                  | 1.16        | COL4A2       | 3.8                                   | 2.2                                   | 0.58        |
| CYC1         | 68.9                                  | 231.2                                 | 3.36        | CSNK1G2      | 156.2                                 | 1021.6                                | 6.54        | COX5B        | 20.8                                  | 112.7                                 | 5.42        | COL4A1       | 3.1                                   | 1.5                                   | 0.48        |
| CYBRD1       | 0.1                                   | 49.3                                  | 493.00      | CSNK1D       | 198.6                                 | 136.4                                 | 0.69        | COX5A        | 32.7                                  | 105.9                                 | 3.24        | COL1A2       | 1.1                                   | 1.5                                   | 1.36        |
| CYBB         | 4.5                                   | 8.3                                   | 1.84        | CSNK1A1      | 163.1                                 | 142.6                                 | 0.87        | COX4I        | 56.9                                  | 260.8                                 | 4.58        | COL1A1       | 0.6                                   | 1.9                                   | 3.17        |
| CYBA         | 4.9                                   | 10.3                                  | 2.10        | CSK          | 167.1                                 | 84                                    | 0.50        | COX20        | 101.1                                 | 277.5                                 | 2.74        | COL18A1      | 15.2                                  | 5.9                                   | 0.39        |
| CYB5R3       | 118                                   | 392                                   | 3.32        | CSE1L        | 182.9                                 | 159.4                                 | 0.87        | COX17        | 102.7                                 | 64.7                                  | 0.63        | COL15A1      | 3                                     | 2                                     | 0.67        |
| CYB5R1       | 38.9                                  | 150                                   | 3.86        | CSDE1        | 144.6                                 | 50.7                                  | 0.35        | COX15        | 84.9                                  | 312.8                                 | 3.68        | COL14A1      | 4.9                                   | 4.5                                   | 0.92        |
| CYB5B        | 129.2                                 | 508.2                                 | 3.93        | CS           | 229.8                                 | 10.2                                  | 0.04        | COX14        | 104.4                                 | 179.7                                 | 1.72        | COL12A1      | 8.3                                   | 9.7                                   | 1.17        |
| CXADR        | 140.6                                 | 866.2                                 | 6.16        | CRYZL1       | 102.6                                 | 34.2                                  | 0.33        | COX11        | 74.7                                  | 251                                   | 3.36        | COIL         | 455.4                                 | 632.3                                 | 1.39        |
| CWF19L1      | 103.1                                 | 55.3                                  | 0.54        | CRYZ         | 69.3                                  | 8.6                                   | 0.12        | COLT1        | 26.4                                  | 7                                     | 0.27        | COG7         | 100.1                                 | 88.3                                  | 0.88        |
| CUX1         | 93.6                                  | 160.2                                 | 1.71        | CRYM         | 37.9                                  | 11.4                                  | 0.30        | CORO7        | 385.9                                 | 155.5                                 | 0.40        | COG6         | 111.9                                 | 78                                    | 0.70        |
| CUTA         | 139.4                                 | 17.6                                  | 0.13        | CRYL1        | 48.6                                  | 10.6                                  | 0.22        | CORO2B       | 85.8                                  | 22.1                                  | 0.26        | COG5         | 111.4                                 | 108.8                                 | 0.98        |
| CUL7         | 144.1                                 | 159.5                                 | 1.11        | CRYBG1       | 144.2                                 | 89.6                                  | 0.62        | CORO1C       | 151                                   | 55.9                                  | 0.37        | COG4         | 95                                    | 99.5                                  | 1.05        |
| CUL5         | 99.7                                  | 72.9                                  | 0.73        | CRYAB        | 625.8                                 | 148.3                                 | 0.24        | CORO1B       | 181.3                                 | 43.4                                  | 0.24        | COG3         | 103                                   | 90                                    | 0.87        |
| CUL4B        | 159.3                                 | 92.5                                  | 0.58        | CRYAA        | 3.4                                   | 7.8                                   | 2.29        | CORO1A       | 4.8                                   | 7.6                                   | 1.58        | COG2         | 174.1                                 | 155.3                                 | 0.89        |
| CUL4A        | 165.2                                 | 95.1                                  | 0.58        | CRTAP        | 238.2                                 | 190                                   | 0.80        | COQ9         | 92                                    | 16.2                                  | 0.18        | COCH         | 2.9                                   | 2.1                                   | 0.72        |
| CUL3         | 120.8                                 | 102.7                                 | 0.85        | CRKL         | 128.4                                 | 122.1                                 | 0.95        | COQ8B        | 346.3                                 | 342.9                                 | 0.99        | COBL1        | 551.8                                 | 603.6                                 | 1.09        |
| CUL2         | 264.6                                 | 116.5                                 | 0.44        | CRK          | 152.2                                 | 121.2                                 | 0.80        | COQ8A        | 22.7                                  | 12.3                                  | 0.54        | COASY        | 85.4                                  | 42.8                                  | 0.50        |
| CUL1         | 283.2                                 | 259.8                                 | 0.92        | CRIP2        | 143.2                                 | 85.2                                  | 0.59        | COQ7         | 50.2                                  | 40.7                                  | 0.81        | COA3         | 44.5                                  | 178.2                                 | 4.00        |
| CUBN         | 12.8                                  | 27.4                                  | 2.14        | CRELD1       | 82.7                                  | 310.3                                 | 3.75        | COQ5         | 36.2                                  | 13.7                                  | 0.38        | COA1         | 111.2                                 | 458.8                                 | 4.13        |
| CTTNBP2NL    | 949.2                                 | 230.9                                 | 0.24        | CREG1        | 63.5                                  | 24                                    | 0.38        | COQ3         | 115.2                                 | 40.2                                  | 0.35        | CNTN1        | 11.2                                  | 21.3                                  | 1.90        |
| CTTN         | 663.3                                 | 204.9                                 | 0.31        | CRBN         | 114.6                                 | 186                                   | 1.62        | COP21        | 152.3                                 | 62.4                                  | 0.41        | CNPY3        | 357.5                                 | 360.4                                 | 1.01        |
| CTSZ         | 51.6                                  | 28.3                                  | 0.55        | CRB2         | 24.3                                  | 49.4                                  | 2.03        | COP56        | 163.5                                 | 50.9                                  | 0.31        | CNPY2        | 96.6                                  | 83.9                                  | 0.87        |
| CTSS         | 30.5                                  | 18.4                                  | 0.60        | CRAT         | 65.8                                  | 6.9                                   | 0.10        | COP55        | 167.8                                 | 48.6                                  | 0.29        | CNP          | 115.6                                 | 236.9                                 | 2.05        |
| CTSH         | 27.2                                  | 16.2                                  | 0.60        | CRADD        | 111.1                                 | 45.1                                  | 0.41        | COP54        | 147.2                                 | 41.1                                  | 0.28        | CNOT9        | 179.8                                 | 97.1                                  | 0.54        |
| CTSC         | 100.6                                 | 63                                    | 0.63        | CR1          | 11.3                                  | 9.9                                   | 0.88        | COP53        | 132.7                                 | 49.5                                  | 0.37        | CNOT7        | 125.6                                 | 124.6                                 | 0.99        |
| CTSB         | 105.8                                 | 63.8                                  | 0.60        | CPVL         | 106                                   | 74.5                                  | 0.70        | COP52        | 146.2                                 | 44                                    | 0.30        | CNOT10       | 187.4                                 | 137.7                                 | 0.73        |
| CTSA         | 80.3                                  | 42.2                                  | 0.53        | CPT2         | 46.5                                  | 21.8                                  | 0.47        | COP62        | 268.4                                 | 205.3                                 | 0.76        | CNOT1        | 148.7                                 | 187.3                                 | 1.26        |
| CTR9         | 118.7                                 | 94.8                                  | 0.80        | CPT1A        | 32.1                                  | 103                                   | 3.21        | COP61        | 114.8                                 | 69.6                                  | 0.61        | CNNM4        | 199                                   | 505.8                                 | 2.54        |

Values are expressed as % of protein abundance in TL of human kidney cortex 1.

**Supplemental table 5 (Continued):**

| Protein name | 3D RPTEC Spheroid_Lot.664995_day12_TL | 3D RPTEC Spheroid_Lot.664995_day12_PM | PM/TL ratio | Protein name | 3D RPTEC Spheroid_Lot.664995_day12_TL | 3D RPTEC Spheroid_Lot.664995_day12_PM | PM/TL ratio | Protein name | 3D RPTEC Spheroid_Lot.664995_day12_TL | 3D RPTEC Spheroid_Lot.664995_day12_PM | PM/TL ratio | Protein name | 3D RPTEC Spheroid_Lot.664995_day12_TL | 3D RPTEC Spheroid_Lot.664995_day12_PM | PM/TL ratio |
|--------------|---------------------------------------|---------------------------------------|-------------|--------------|---------------------------------------|---------------------------------------|-------------|--------------|---------------------------------------|---------------------------------------|-------------|--------------|---------------------------------------|---------------------------------------|-------------|
| CNNM3        | 102.5                                 | 689.2                                 | 6.72        | CKMT1A       | 113                                   | 124.8                                 | 1.10        | CETN2        | 144.6                                 | 65                                    | 0.45        | CD63         | 468.2                                 | 2870.3                                | 6.13        |
| CNN3         | 169.2                                 | 55.5                                  | 0.33        | CKB          | 1255.6                                | 378.7                                 | 0.30        | CES2         | 40.5                                  | 30.6                                  | 0.76        | CD59         | 140.1                                 | 799                                   | 5.70        |
| CNN2         | 78.3                                  | 34.4                                  | 0.44        | CKAP5        | 174.1                                 | 184.1                                 | 1.06        | CES1         | 8.2                                   | 4.7                                   | 0.57        | CD58         | 227.1                                 | 1115.8                                | 4.91        |
| CNN1         | 7.1                                   | 14.9                                  | 2.10        | CKAP4        | 116.3                                 | 339.5                                 | 2.92        | CERT1        | 137.3                                 | 63.4                                  | 0.46        | CD55         | 27.6                                  | 64.9                                  | 2.35        |
| CNIH4        | 51                                    | 249.3                                 | 4.89        | CISD3        | 31.3                                  | 15.6                                  | 0.50        | CERS6        | 83.9                                  | 315.8                                 | 3.77        | CD47         | 135.6                                 | 1033.6                                | 7.62        |
| CNDP2        | 149                                   | 33.6                                  | 0.23        | CISD2        | 91.1                                  | 286.2                                 | 3.14        | CERS5        | 82.9                                  | 345.5                                 | 4.17        | CD46         | 111.5                                 | 364.2                                 | 3.27        |
| CNBP         | 102.7                                 | 19.5                                  | 0.19        | CISD1        | 54.3                                  | 203.4                                 | 3.75        | CERS2        | 145.4                                 | 608.8                                 | 4.19        | CD46         | 137.2                                 | 1838.7                                | 13.40       |
| CMTM6        | 301.4                                 | 2301.6                                | 7.64        | CIRBP        | 86.2                                  | 0.9                                   | 0.01        | CEPT         | 109                                   | 697.2                                 | 6.40        | CD44         | 344.3                                 | 2153.2                                | 6.25        |
| CMPK1        | 192.6                                 | 43.9                                  | 0.23        | CIB1         | 33.2                                  | 141.9                                 | 4.27        | CENPV        | 31                                    | 8.2                                   | 0.26        | CD36         | 15.9                                  | 10.8                                  | 0.68        |
| CMC1         | 87.7                                  | 158.4                                 | 1.81        | CIAPIN1      | 501.8                                 | 109.4                                 | 0.22        | CEMP2        | 178.6                                 | 1015.2                                | 5.68        | CD2AP        | 261.4                                 | 278.2                                 | 1.06        |
| CMBL         | 88.5                                  | 27.7                                  | 0.31        | CIAO3        | 81.7                                  | 29                                    | 0.35        | CELSR1       | 97.1                                  | 372                                   | 3.83        | CD163        | 10.7                                  | 15.8                                  | 1.48        |
| CMAS         | 121.5                                 | 26.6                                  | 0.22        | CIAO2B       | 168.6                                 | 96.3                                  | 0.57        | CELF1        | 137.3                                 | 37.2                                  | 0.27        | CD151        | 216.9                                 | 1920.4                                | 8.85        |
| CLYBL        | 89.9                                  | 6.7                                   | 0.07        | CIAO2A       | 129.1                                 | 46.6                                  | 0.36        | CEBPZOS      | 22.9                                  | 169.8                                 | 7.41        | CD14         | 32                                    | 83.8                                  | 2.62        |
| CLUH         | 159.8                                 | 34.4                                  | 0.22        | CIAO1        | 161.4                                 | 115.4                                 | 0.71        | CEBPZ        | 203.7                                 | 263.9                                 | 1.30        | CD109        | 102.2                                 | 178                                   | 1.74        |
| CLU          | 47.7                                  | 103.3                                 | 2.17        | CHUK         | 74.8                                  | 61.5                                  | 0.82        | CEACAM1      | 50.3                                  | 266.3                                 | 5.29        | CCZ1B        | 141.7                                 | 371.8                                 | 2.62        |
| CLTRN        | 20.6                                  | 72.9                                  | 3.54        | CHRD         | 303.2                                 | 371.4                                 | 1.22        | CDV3         | 1502                                  | 240.9                                 | 0.16        | CCT8         | 165.5                                 | 57.6                                  | 0.35        |
| CLTC         | 104.7                                 | 94.8                                  | 0.91        | CHPF         | 93.7                                  | 371.7                                 | 3.97        | CDSN         | 85.9                                  | 75.7                                  | 0.88        | CCT7         | 136.8                                 | 42.6                                  | 0.31        |
| CLTB         | 34.4                                  | 11                                    | 0.32        | CHP1         | 61                                    | 238.4                                 | 3.91        | CDS2         | 82.5                                  | 316.9                                 | 3.84        | CCT6A        | 166.3                                 | 51.7                                  | 0.31        |
| CLTA         | 104.5                                 | 34.9                                  | 0.33        | CHORDC1      | 205.4                                 | 66.3                                  | 0.32        | CDS1         | 75.3                                  | 341.8                                 | 4.54        | CCT5         | 177.1                                 | 56.9                                  | 0.32        |
| CLRN3        | 50.3                                  | 309.9                                 | 6.16        | CHMP7        | 69.5                                  | 80.9                                  | 1.16        | CDKN2AIP     | 152.1                                 | 84.7                                  | 0.56        | CCT4         | 183.3                                 | 63.8                                  | 0.35        |
| CLPX         | 161.8                                 | 21.8                                  | 0.13        | CHMP6        | 82.7                                  | 289.1                                 | 3.50        | CDKAL1       | 163.9                                 | 489.6                                 | 2.99        | CCT3         | 172.5                                 | 58.4                                  | 0.34        |
| CLPTM1L      | 91.4                                  | 373.8                                 | 4.09        | CHMP5        | 147.3                                 | 374.8                                 | 2.54        | CDK6         | 106.7                                 | 49.1                                  | 0.46        | CCT2         | 177                                   | 64                                    | 0.36        |
| CLPTM1       | 69                                    | 225.7                                 | 3.27        | CHMP4B       | 274.1                                 | 562.8                                 | 2.05        | CDK5RAP3     | 84.2                                  | 112.1                                 | 1.33        | CCS          | 145.9                                 | 44.8                                  | 0.31        |
| CLPP         | 128.7                                 | 15                                    | 0.12        | CHMP4A       | 184                                   | 131.1                                 | 0.71        | CDK5         | 181.5                                 | 120.8                                 | 0.67        | CCNY         | 77.3                                  | 440.5                                 | 5.70        |
| CLPB         | 69                                    | 89.2                                  | 1.29        | CHMP3        | 91.8                                  | 81.9                                  | 0.89        | CDK4         | 244.7                                 | 139                                   | 0.57        | CCNK         | 140.1                                 | 100.8                                 | 0.72        |
| CLN6         | 241.1                                 | 285.9                                 | 1.19        | CHMP2B       | 73.7                                  | 84.9                                  | 1.15        | CDK16        | 108.9                                 | 222.5                                 | 2.04        | CCDC93       | 118.4                                 | 113.5                                 | 0.96        |
| CLN5         | 219.1                                 | 125.5                                 | 0.57        | CHMP2A       | 100.3                                 | 158.1                                 | 1.58        | CDK1         | 290.2                                 | 207.5                                 | 0.72        | CCDC90B      | 92.3                                  | 252.6                                 | 2.74        |
| CLMN         | 94.6                                  | 89.3                                  | 0.94        | CHMP1B       | 90.8                                  | 311.7                                 | 3.43        | CDHR5        | 29.7                                  | 43.4                                  | 1.46        | CCDC86       | 711.6                                 | 522.1                                 | 0.73        |
| CLIP1        | 157.7                                 | 28.8                                  | 0.18        | CHL1         | 2.2                                   | 4.5                                   | 2.05        | CDHR2        | 15.2                                  | 46.2                                  | 3.04        | CCDC8        | 174.1                                 | 598                                   | 3.21        |
| CLINT1       | 100.2                                 | 93.2                                  | 0.93        | CHKB         | 224.9                                 | 56.7                                  | 0.25        | CDH6         | 215.5                                 | 440.1                                 | 2.04        | CCDC6        | 179                                   | 40.8                                  | 0.23        |
| CLINT1       | 123.5                                 | 217.9                                 | 1.76        | CHID1        | 86.9                                  | 70.6                                  | 0.81        | CDH5         | 4.2                                   | 6.1                                   | 1.45        | CCDC51       | 111                                   | 378.7                                 | 3.41        |
| CLIC5        | 2.1                                   | 0.4                                   | 0.19        | CHIC2        | 134.2                                 | 1084.3                                | 8.08        | CDH2         | 50.6                                  | 283                                   | 5.59        | CCDC50       | 262.1                                 | 363.7                                 | 1.39        |
| CLIC4        | 153.9                                 | 102.5                                 | 0.67        | CHI3L1       | 4.2                                   | 10.8                                  | 2.57        | CDH16        | 46                                    | 169.3                                 | 3.68        | CCDC47       | 104                                   | 344                                   | 3.31        |
| CLIC2        | 1.2                                   | 0.1                                   | 0.08        | CHERP        | 179.2                                 | 109.5                                 | 0.61        | CDH13        | 11.4                                  | 9.5                                   | 0.83        | CCDC25       | 157.7                                 | 152.4                                 | 0.97        |
| CLIC1        | 351.5                                 | 87.7                                  | 0.25        | CHDH         | 31.1                                  | 41.9                                  | 1.35        | CDH1         | 28.2                                  | 32.8                                  | 1.16        | CCDC22       | 131.9                                 | 117                                   | 0.89        |
| CLGN         | 225.7                                 | 770                                   | 3.41        | CHD4         | 122                                   | 76.5                                  | 0.63        | CDCP1        | 486                                   | 2118.7                                | 4.36        | CCDC168      | 75.3                                  | 66.6                                  | 0.88        |
| CLEC3B       | 12.2                                  | 3.9                                   | 0.32        | CHCHD6       | 89.3                                  | 268.4                                 | 3.01        | CDK73        | 146.1                                 | 22.6                                  | 0.15        | CCDC127      | 165.2                                 | 354.6                                 | 2.15        |
| CLEC18B      | 32.1                                  | 28.1                                  | 0.88        | CHCHD4       | 34.4                                  | 95.4                                  | 2.77        | CDK5L        | 165.4                                 | 81.7                                  | 0.49        | CCDC124      | 257                                   | 37.1                                  | 0.14        |
| CLDND1       | 179.3                                 | 632.1                                 | 3.53        | CHCHD3       | 96.7                                  | 252.1                                 | 2.61        | CDC42B8PB    | 127.3                                 | 162.4                                 | 1.28        | CCDC12       | 158.4                                 | 122.9                                 | 0.78        |
| CLDN7        | 62.1                                  | 179.3                                 | 2.89        | CHAMP1       | 140                                   | 48.5                                  | 0.35        | CDC42BPA     | 109.3                                 | 153.3                                 | 1.40        | CCAR2        | 150                                   | 54.7                                  | 0.36        |
| CLDN3        | 79.9                                  | 506.4                                 | 6.34        | CGNL1        | 123.4                                 | 57.8                                  | 0.47        | CDC42        | 118.7                                 | 289.2                                 | 2.44        | CCAR1        | 183.7                                 | 60.3                                  | 0.33        |
| CLDN2        | 55.6                                  | 352.2                                 | 6.33        | CFL2         | 120.6                                 | 40.1                                  | 0.33        | CDC40        | 114.4                                 | 111.3                                 | 0.97        | CC2D1B       | 99.9                                  | 85                                    | 0.85        |
| CLCNKB       | 52.9                                  | 106.4                                 | 2.01        | CFL1         | 264.4                                 | 66.8                                  | 0.25        | CDC37        | 116.6                                 | 56.4                                  | 0.48        | CC2D1A       | 158.5                                 | 231.1                                 | 1.46        |
| CLCN7        | 194.7                                 | 1391                                  | 7.14        | CFI          | 54                                    | 80.2                                  | 1.49        | CDC16        | 135.6                                 | 56                                    | 0.41        | CBX5         | 210                                   | 6.4                                   | 0.03        |
| CLCN5        | 84.8                                  | 420.9                                 | 4.96        | CFHR5        | 1.2                                   | 2.2                                   | 1.83        | CD97         | 88.8                                  | 632.6                                 | 7.12        | CBX3         | 141.4                                 | 7.7                                   | 0.05        |
| CLCN3        | 130.6                                 | 879.2                                 | 6.73        | CFHR2        | 2.1                                   | 1.6                                   | 0.76        | CD93         | 0.1                                   | 10.9                                  | 109.00      | CBWD3        | 164.4                                 | 55.4                                  | 0.34        |
| CLOC1        | 59.1                                  | 217.5                                 | 3.68        | CFH          | 6.2                                   | 3.8                                   | 0.61        | CD9          | 62                                    | 349.8                                 | 5.64        | CBR4         | 37                                    | 4                                     | 0.11        |
| CLASP2       | 131                                   | 100.7                                 | 0.77        | CFD          | 7.3                                   | 5                                     | 0.68        | CD81         | 42.1                                  | 237.9                                 | 5.65        | CBR1         | 193.4                                 | 42.8                                  | 0.22        |
| CLASP1       | 197.8                                 | 200.6                                 | 1.01        | CFB          | 8.8                                   | 11.8                                  | 1.34        | CD74         | 95.3                                  | 302.1                                 | 3.17        | CBFB         | 226.2                                 | 104.5                                 | 0.46        |
| CKMT2        | 18.2                                  | 12.7                                  | 0.70        | CFAP298      | 254.5                                 | 56.2                                  | 0.22        | CD68         | 285.7                                 | 1521.8                                | 5.33        | CAVIN2       | 11.9                                  | 14.3                                  | 1.20        |

Values are expressed as % of protein abundance in TL of human kidney cortex 1.

**Supplemental table 5 (Continued):**

| Protein name | 3D RP/TEC Spheroid_Lot.664995_day12_TL | 3D RP/TEC Spheroid_Lot.664995_day12_PM | PM/TL ratio | Protein name | 3D RP/TEC Spheroid_Lot.664995_day12_TL | 3D RP/TEC Spheroid_Lot.664995_day12_PM | PM/TL ratio | Protein name | 3D RP/TEC Spheroid_Lot.664995_day12_TL | 3D RP/TEC Spheroid_Lot.664995_day12_PM | PM/TL ratio | Protein name | 3D RP/TEC Spheroid_Lot.664995_day12_TL | 3D RP/TEC Spheroid_Lot.664995_day12_PM | PM/TL ratio |
|--------------|----------------------------------------|----------------------------------------|-------------|--------------|----------------------------------------|----------------------------------------|-------------|--------------|----------------------------------------|----------------------------------------|-------------|--------------|----------------------------------------|----------------------------------------|-------------|
| CAVIN1       | 52.8                                   | 199.1                                  | 3.77        | CACYBP       | 198.9                                  | 56                                     | 0.28        | BTF3         | 452.1                                  | 52.9                                   | 0.12        | BAX          | 198.7                                  | 208.7                                  | 1.05        |
| CAV2         | 62.1                                   | 357.8                                  | 5.76        | CACUL1       | 189.1                                  | 83.8                                   | 0.44        | BST1         | 21.6                                   | 96.7                                   | 4.48        | BASP1        | 23.3                                   | 110.5                                  | 4.74        |
| CAV1         | 66.8                                   | 200.8                                  | 3.01        | CACNA2D1     | 66.4                                   | 346.1                                  | 5.21        | BSND         | 35.6                                   | 25.4                                   | 0.71        | BAP18        | 154.8                                  | 72                                     | 0.47        |
| CAST         | 691.6                                  | 145.9                                  | 0.21        | CACNA2D1     | 85.9                                   | 439.2                                  | 5.11        | BSG          | 148.2                                  | 927.1                                  | 6.26        | BANF1        | 172.4                                  | 46.8                                   | 0.27        |
| CASR         | 41.2                                   | 57.9                                   | 1.41        | CAB39        | 159.6                                  | 126.9                                  | 0.80        | BROX         | 162.6                                  | 417.2                                  | 2.57        | BAIAP2L1     | 416.1                                  | 2071.2                                 | 4.98        |
| CASP9        | 118.6                                  | 40.3                                   | 0.34        | CA8          | 224.1                                  | 249                                    | 1.11        | BRK1         | 110.2                                  | 171.4                                  | 1.56        | BAIAP2       | 85.6                                   | 458.1                                  | 5.35        |
| CASP8        | 172.8                                  | 64.9                                   | 0.38        | CA4          | 16                                     | 34.8                                   | 2.18        | BRX1         | 97.2                                   | 124.4                                  | 1.28        | BAG6         | 170.7                                  | 123.7                                  | 0.72        |
| CASP7        | 149.2                                  | 39.9                                   | 0.27        | CA3          | 183.5                                  | 50.6                                   | 0.28        | BRI3BP       | 137.5                                  | 296.3                                  | 2.15        | BAG5         | 210.3                                  | 363.3                                  | 1.73        |
| CASP6        | 197.4                                  | 43.7                                   | 0.22        | CA13         | 362.4                                  | 98.6                                   | 0.27        | BRD9         | 215.2                                  | 385.4                                  | 1.79        | BAG3         | 323.3                                  | 193.9                                  | 0.60        |
| CASP3        | 649.9                                  | 347.7                                  | 0.54        | CA12         | 128.2                                  | 818                                    | 6.38        | BRCC3        | 146.8                                  | 41.4                                   | 0.28        | BAG2         | 284.3                                  | 270.2                                  | 0.95        |
| CASP1        | 117.5                                  | 41.9                                   | 0.36        | C9orf64      | 182.8                                  | 79.8                                   | 0.44        | BPNT1        | 247.3                                  | 53                                     | 0.21        | BACH1        | 101.6                                  | 14.1                                   | 0.14        |
| CASK         | 127.6                                  | 537.7                                  | 4.21        | C9           | 0.2                                    | 0.3                                    | 1.50        | BP1FA3       | 125.7                                  | 17.1                                   | 0.14        | BABAM2       | 147.4                                  | 87.2                                   | 0.59        |
| CASC4        | 73.7                                   | 223.8                                  | 3.04        | C8orf82      | 54.4                                   | 5                                      | 0.09        | BP1HL        | 24.9                                   | 3.8                                    | 0.15        | B4GAT1       | 72.4                                   | 249                                    | 3.44        |
| CARS2        | 153.5                                  | 13.1                                   | 0.09        | C8G          | 3.1                                    | 3.9                                    | 1.26        | BPGM         | 148.9                                  | 84.7                                   | 0.57        | B4GALT5      | 201.2                                  | 608.4                                  | 3.02        |
| CARS1        | 232.7                                  | 47.3                                   | 0.20        | C8B          | 3.1                                    | 7.1                                    | 2.29        | BOLA3        | 132.1                                  | 7.2                                    | 0.05        | B4GALT1      | 120.6                                  | 444.4                                  | 3.68        |
| CARMIL1      | 329.4                                  | 615.6                                  | 1.87        | C8A          | 2.4                                    | 0.1                                    | 0.04        | BOLA2        | 452.8                                  | 120.6                                  | 0.27        | B3GNT2       | 124.1                                  | 267.2                                  | 2.15        |
| CARM1        | 144.2                                  | 70.8                                   | 0.49        | C7orf80      | 176.7                                  | 173.9                                  | 0.98        | BNIP1        | 87.4                                   | 265                                    | 3.03        | B3GLCT       | 116.1                                  | 101.2                                  | 0.87        |
| CARHSP1      | 126.9                                  | 32.8                                   | 0.26        | C7           | 3.3                                    | 1.7                                    | 0.52        | BMP2K        | 164.2                                  | 126.2                                  | 0.77        | B3GAT3       | 115.5                                  | 400.6                                  | 3.47        |
| CARD19       | 117.5                                  | 346                                    | 2.94        | C6orf89      | 86.2                                   | 196.8                                  | 2.28        | BLVRB        | 103.3                                  | 26.4                                   | 0.26        | B3GALT6      | 57.9                                   | 171.7                                  | 2.97        |
| CAPZB        | 151.9                                  | 76.7                                   | 0.50        | C6orf136     | 76.9                                   | 127.5                                  | 1.66        | BLVRA        | 238.5                                  | 35.5                                   | 0.15        | AZGP1        | 9.5                                    | 11.8                                   | 1.24        |
| CAPZA2       | 133.2                                  | 73.8                                   | 0.55        | C6orf120     | 70.4                                   | 340.1                                  | 4.83        | BLMH         | 156.7                                  | 51.4                                   | 0.33        | AUP1         | 75.3                                   | 287.3                                  | 3.82        |
| CAPZA1       | 179.8                                  | 88.7                                   | 0.49        | C6           | 3.4                                    | 2.6                                    | 0.76        | BIRC6        | 152.3                                  | 167.1                                  | 1.10        | AUH          | 57.3                                   | 7.6                                    | 0.13        |
| CAPRIN1      | 156.9                                  | 26.9                                   | 0.17        | C5orf51      | 155.1                                  | 104.7                                  | 0.68        | BIN1         | 316.2                                  | 105.2                                  | 0.33        | ATXN2L       | 653.4                                  | 189.1                                  | 0.29        |
| CAPNS1       | 224.6                                  | 69.3                                   | 0.31        | C4BPA        | 1.5                                    | 0.1                                    | 0.07        | BHMT2        | 4                                      | 4.5                                    | 1.13        | ATXN2        | 380.8                                  | 125.6                                  | 0.33        |
| CAPN6        | 273.8                                  | 1621.8                                 | 5.92        | C4B          | 34.5                                   | 35.8                                   | 1.04        | BHMT         | 2.7                                    | 2.6                                    | 0.96        | ATXN10       | 235                                    | 294.3                                  | 1.25        |
| CAPN5        | 38.1                                   | 228.1                                  | 5.99        | C4A          | 45.4                                   | 89.9                                   | 1.98        | BGN          | 5.8                                    | 10.5                                   | 1.81        | ATRN         | 256.4                                  | 1028.2                                 | 4.01        |
| CAPN2        | 194.2                                  | 55.6                                   | 0.29        | C3           | 20.9                                   | 23.2                                   | 1.11        | BET1         | 202.1                                  | 761.2                                  | 3.77        | ATRAID       | 313.2                                  | 2088.7                                 | 6.67        |
| CAPN1        | 171.4                                  | 70.2                                   | 0.41        | C2CD2L       | 93.6                                   | 369.2                                  | 3.94        | BDH2         | 122.1                                  | 30.1                                   | 0.25        | ATPAF1       | 112.6                                  | 32.8                                   | 0.29        |
| CAPG         | 962.1                                  | 253.9                                  | 0.26        | C2           | 19.8                                   | 20.3                                   | 1.03        | BDH1         | 107.4                                  | 392.5                                  | 3.65        | ATP9B        | 130.3                                  | 723.9                                  | 5.56        |
| CAP2         | 106.3                                  | 27.5                                   | 0.26        | C1S          | 21.2                                   | 23.6                                   | 1.11        | BCS1L        | 69.2                                   | 205                                    | 2.96        | ATP7B        | 91                                     | 488.8                                  | 5.37        |
| CAP1         | 184.9                                  | 53.5                                   | 0.29        | C1QBP        | 124.2                                  | 13.9                                   | 0.11        | BCR          | 48.1                                   | 61.1                                   | 1.27        | ATP7A        | 109.5                                  | 441                                    | 4.03        |
| CANX         | 89                                     | 356.3                                  | 4.00        | C1orf43      | 27.9                                   | 97                                     | 3.48        | BCLAF1       | 296.7                                  | 67.6                                   | 0.23        | ATP6V1H      | 70                                     | 331.3                                  | 4.73        |
| CANTI        | 108.9                                  | 288.2                                  | 2.65        | C1orf198     | 31.3                                   | 46                                     | 1.47        | BCL2L2       | 44.1                                   | 50.8                                   | 1.15        | ATP6V1G1     | 92.8                                   | 437                                    | 4.71        |
| CAND1        | 151                                    | 57.4                                   | 0.38        | C1GALT1C1    | 103.2                                  | 338.1                                  | 3.28        | BCL2L13      | 114.7                                  | 381.2                                  | 3.32        | ATP6V1E1     | 98.9                                   | 364.4                                  | 3.68        |
| CAMLG        | 148.8                                  | 536.6                                  | 3.61        | C1GALT1      | 83.1                                   | 303.1                                  | 3.65        | BCL2L1       | 157.5                                  | 340.5                                  | 2.16        | ATP6V1D      | 77.6                                   | 305.2                                  | 3.93        |
| CAMKK2       | 173.7                                  | 113.7                                  | 0.65        | C18orf32     | 127.4                                  | 461.5                                  | 3.62        | BCKDK        | 101.8                                  | 6.9                                    | 0.07        | ATP6V1C1     | 84.7                                   | 330.2                                  | 3.90        |
| CAMK2G       | 54.4                                   | 58.2                                   | 1.07        | C17orf75     | 145.5                                  | 120.4                                  | 0.83        | BCKDHB       | 26                                     | 1.3                                    | 0.05        | ATP6V1B2     | 82.9                                   | 379.6                                  | 4.58        |
| CAMK2D       | 150.1                                  | 121.1                                  | 0.81        | C16orf58     | 93.3                                   | 310.2                                  | 3.32        | BCKDHA       | 39.2                                   | 15.1                                   | 0.39        | ATP6V1B1     | 10.1                                   | 9.4                                    | 0.93        |
| CAMK1        | 71.8                                   | 19.2                                   | 0.27        | C12orf4      | 79.7                                   | 42.9                                   | 0.54        | BCCIP        | 349.7                                  | 16.5                                   | 0.05        | ATP6V1A      | 76.2                                   | 313.1                                  | 4.11        |
| CALU         | 142.1                                  | 111.2                                  | 0.78        | C12orf10     | 184.6                                  | 28.9                                   | 0.16        | BCCIP        | 268.1                                  | 117.6                                  | 0.44        | ATP6V0D2     | 7.9                                    | 4.9                                    | 0.62        |
| CALR         | 100.3                                  | 99.7                                   | 0.99        | C11orf54     | 56.6                                   | 15.2                                   | 0.27        | BCAT2        | 427.2                                  | 11.8                                   | 0.03        | ATP6V0D1     | 134.8                                  | 970.4                                  | 7.20        |
| CALML4       | 55.5                                   | 37.8                                   | 0.68        | BZW2         | 399.6                                  | 160.4                                  | 0.40        | BCAT1        | 94.7                                   | 176.7                                  | 1.87        | ATP6V0A4     | 27.7                                   | 99.8                                   | 3.60        |
| CALM3        | 93.1                                   | 108.2                                  | 1.16        | BZW1         | 210                                    | 51.7                                   | 0.25        | BCAS3        | 258.8                                  | 98.6                                   | 0.38        | ATP6V0A2     | 117.5                                  | 625.9                                  | 5.33        |
| CALD1        | 44                                     | 10.7                                   | 0.24        | BYSL         | 333                                    | 247.5                                  | 0.74        | BCAS2        | 149.3                                  | 80                                     | 0.54        | ATP6V0A1     | 133                                    | 987.3                                  | 7.42        |
| CALCOOC2     | 181.9                                  | 319.5                                  | 1.76        | BUD31        | 116.9                                  | 57.3                                   | 0.49        | BCAP31       | 104.9                                  | 313.8                                  | 2.99        | ATP6AP1      | 251.8                                  | 2671.8                                 | 10.61       |
| CALCOOC1     | 172.4                                  | 107                                    | 0.62        | BUD23        | 174.4                                  | 100.3                                  | 0.58        | BCAP29       | 328.2                                  | 908.6                                  | 2.77        | ATP5PO       | 91.7                                   | 236.4                                  | 2.58        |
| CALB1        | 5.9                                    | 6.2                                    | 1.05        | BUB3         | 134.4                                  | 23.4                                   | 0.17        | BCAM         | 28.2                                   | 67.8                                   | 2.40        | ATP5PD       | 63.2                                   | 233.1                                  | 3.69        |
| CADM4        | 37.1                                   | 159.1                                  | 4.29        | BTN3A3       | 127.3                                  | 508.2                                  | 3.99        | BBS1         | 87.2                                   | 54.6                                   | 0.63        | ATP5PB       | 71.7                                   | 249.9                                  | 3.49        |
| CADM1        | 35.4                                   | 146.8                                  | 4.15        | BTN2A1       | 70.7                                   | 361.7                                  | 5.12        | BBOX1        | 14                                     | 9.4                                    | 0.67        | ATP5MPL      | 43.8                                   | 156.2                                  | 3.57        |
| CAD          | 288.3                                  | 159.6                                  | 0.55        | BTF3L4       | 338.2                                  | 31.3                                   | 0.09        | BAZ1B        | 92.5                                   | 58.1                                   | 0.63        | ATP5MG       | 73.5                                   | 254.5                                  | 3.46        |

Values are expressed as % of protein abundance in TL of human kidney cortex 1.

## Supplemental table 5 (Continued):

| Protein name | 3D RPTEC Spheroid_Lot.664995_day12_TL |                                        |             | PM/TL ratio |           | 3D RPTEC Spheroid_Lot.664995_day12_P.M |                                        |             | PM/TL ratio |          | 3D RPTEC Spheroid_Lot.664995_day12_TL |                                        |             | PM/TL ratio |          | 3D RPTEC Spheroid_Lot.664995_day12_P.M |                                        |             | PM/TL ratio |
|--------------|---------------------------------------|----------------------------------------|-------------|-------------|-----------|----------------------------------------|----------------------------------------|-------------|-------------|----------|---------------------------------------|----------------------------------------|-------------|-------------|----------|----------------------------------------|----------------------------------------|-------------|-------------|
|              | 3D RPTEC Spheroid_Lot.664995_day12_TL | 3D RPTEC Spheroid_Lot.664995_day12_P.M | PM/TL ratio |             |           | 3D RPTEC Spheroid_Lot.664995_day12_TL  | 3D RPTEC Spheroid_Lot.664995_day12_P.M | PM/TL ratio |             |          | 3D RPTEC Spheroid_Lot.664995_day12_TL | 3D RPTEC Spheroid_Lot.664995_day12_P.M | PM/TL ratio |             |          | 3D RPTEC Spheroid_Lot.664995_day12_TL  | 3D RPTEC Spheroid_Lot.664995_day12_P.M | PM/TL ratio |             |
| ATP5MF       | 153.5                                 | 463.7                                  | 3.02        |             | AS3MT     | 111.6                                  | 43.8                                   | 0.39        |             | ARHGAP21 | 96.8                                  | 148.2                                  | 1.53        |             | AP2S1    | 97.6                                   | 78.2                                   | 0.80        |             |
| ATP5ME       | 58.1                                  | 170.5                                  | 2.93        |             | ARVCF     | 61.6                                   | 287.7                                  | 4.67        |             | ARHGAP18 | 161.2                                 | 159.6                                  | 0.99        |             | AP2M1    | 64.9                                   | 48.5                                   | 0.75        |             |
| ATP5MD       | 52.8                                  | 154.9                                  | 2.93        |             | ARSL      | 4                                      | 19.8                                   | 4.95        |             | ARHGAP17 | 96.7                                  | 84.6                                   | 0.87        |             | AP2B1    | 103                                    | 74.2                                   | 0.72        |             |
| ATP5IF1      | 97.3                                  | 89.5                                   | 0.92        |             | ARSF      | 2.4                                    | 6.8                                    | 2.83        |             | ARHGAP12 | 95.2                                  | 60.2                                   | 0.63        |             | AP2A2    | 99.9                                   | 67.1                                   | 0.67        |             |
| ATP5F1E      | 101.6                                 | 202.3                                  | 1.99        |             | ARSD      | 115.6                                  | 181.6                                  | 1.57        |             | ARHGAP1  | 194.6                                 | 118.7                                  | 0.61        |             | AP2A1    | 102                                    | 85.1                                   | 0.83        |             |
| ATP5F1D      | 83                                    | 234                                    | 2.82        |             | ARSB      | 62.3                                   | 38.4                                   | 0.62        |             | ARG2     | 1231                                  | 54.3                                   | 0.04        |             | AP1S2    | 83.2                                   | 135                                    | 1.62        |             |
| ATP5F1C      | 84.7                                  | 256.3                                  | 3.03        |             | ARSA      | 308.8                                  | 176.4                                  | 0.57        |             | ARFRP1   | 107.6                                 | 248                                    | 2.30        |             | AP1S1    | 118.1                                  | 101.5                                  | 0.86        |             |
| ATP5F1B      | 87                                    | 226.2                                  | 2.60        |             | ARRDC1    | 153.8                                  | 538.9                                  | 3.50        |             | ARFIP2   | 93.3                                  | 50.7                                   | 0.54        |             | AP1M2    | 24.3                                   | 16.7                                   | 0.69        |             |
| ATP5F1A      | 91.3                                  | 224.3                                  | 2.46        |             | ARRB1     | 36.8                                   | 4.9                                    | 0.13        |             | ARFIP1   | 237.6                                 | 76.4                                   | 0.32        |             | AP1M1    | 122.3                                  | 90.7                                   | 0.74        |             |
| ATP2C1       | 95.1                                  | 244.3                                  | 2.57        |             | ARPC5L    | 156                                    | 60.1                                   | 0.39        |             | ARFGEF2  | 88.9                                  | 98                                     | 1.10        |             | AP1G2    | 120.4                                  | 109.1                                  | 0.91        |             |
| ATP2C1       | 186                                   | 1430.2                                 | 7.69        |             | ARPC5     | 158.8                                  | 49.6                                   | 0.31        |             | ARFGEF1  | 111.3                                 | 122.9                                  | 1.10        |             | AP1G1    | 106.3                                  | 83.6                                   | 0.79        |             |
| ATP2C1       | 197.4                                 | 1066.9                                 | 5.40        |             | ARPC4     | 135.6                                  | 59                                     | 0.44        |             | ARFGAP3  | 10292.1                               | 3701.3                                 | 0.36        |             | AP1B1    | 108.6                                  | 77.8                                   | 0.72        |             |
| ATP2B4       | 148.1                                 | 929.8                                  | 6.28        |             | ARPC3     | 163.8                                  | 66.4                                   | 0.41        |             | ARFGAP2  | 209.8                                 | 66.2                                   | 0.32        |             | AP1AR    | 117.8                                  | 421.8                                  | 3.58        |             |
| ATP2B1       | 114.1                                 | 573.8                                  | 5.03        |             | ARPC2     | 137.5                                  | 48.2                                   | 0.35        |             | ARFGAP1  | 171.2                                 | 105.6                                  | 0.62        |             | AOX1     | 92.4                                   | 29.3                                   | 0.32        |             |
| ATP2A2       | 93.6                                  | 331.4                                  | 3.54        |             | ARPC1B    | 223.8                                  | 93.4                                   | 0.42        |             | ARF6     | 129.7                                 | 162.7                                  | 1.25        |             | AOC3     | 8.6                                    | 18.8                                   | 2.19        |             |
| ATP1B3       | 169.4                                 | 1160.1                                 | 6.85        |             | ARPC1A    | 38.4                                   | 16.4                                   | 0.43        |             | ARF5     | 127.9                                 | 57.5                                   | 0.45        |             | AOC1     | 11.4                                   | 5.2                                    | 0.46        |             |
| ATP1B1       | 127.1                                 | 1008.9                                 | 7.94        |             | ARMT1     | 228.3                                  | 40.5                                   | 0.18        |             | ARF4     | 129.6                                 | 121.2                                  | 0.94        |             | ANXA7    | 122.6                                  | 113.2                                  | 0.92        |             |
| ATP1A1       | 127.8                                 | 964.4                                  | 7.55        |             | ARMCX3    | 130.7                                  | 282.1                                  | 2.16        |             | ARF3     | 125.6                                 | 66.8                                   | 0.53        |             | ANXA6    | 51.9                                   | 45.9                                   | 0.88        |             |
| ATP13A3      | 149.4                                 | 941.6                                  | 6.30        |             | ARMCX2    | 93.6                                   | 350.2                                  | 3.74        |             | ARCN1    | 142.2                                 | 64.2                                   | 0.45        |             | ANXA4    | 200.7                                  | 146                                    | 0.73        |             |
| ATP13A1      | 160.2                                 | 609.7                                  | 3.81        |             | ARMCX1    | 82.6                                   | 165                                    | 2.00        |             | ARAF     | 122.1                                 | 115.9                                  | 0.95        |             | ANXA3    | 160                                    | 32.9                                   | 0.21        |             |
| ATP11C       | 65.1                                  | 402.9                                  | 6.19        |             | ARMC6     | 192.3                                  | 151.4                                  | 0.79        |             | AQR      | 81.3                                  | 63.2                                   | 0.78        |             | ANXA2    | 235.5                                  | 97.3                                   | 0.41        |             |
| ATP11B       | 172.2                                 | 1119.7                                 | 6.50        |             | ARMC10    | 94.7                                   | 332.4                                  | 3.51        |             | AQP2     | 63.6                                  | 68.8                                   | 1.08        |             | ANXA13   | 7.6                                    | 7.9                                    | 1.04        |             |
| ATP11A       | 142.2                                 | 1026.2                                 | 7.22        |             | ARMC1     | 167.6                                  | 168.5                                  | 1.01        |             | AQP1     | 66.2                                  | 525.5                                  | 7.94        |             | ANXA11   | 155.6                                  | 194.6                                  | 1.25        |             |
| ATL3         | 86.6                                  | 236.1                                  | 2.73        |             | ARL8B     | 129.7                                  | 636.1                                  | 4.90        |             | APRT     | 123.6                                 | 25.4                                   | 0.21        |             | ANXA1    | 350.2                                  | 105.1                                  | 0.30        |             |
| ATL1         | 74.6                                  | 124.3                                  | 1.67        |             | ARL8A     | 137.7                                  | 637.3                                  | 4.63        |             | APPL2    | 61.6                                  | 66.5                                   | 1.08        |             | ANPEP    | 170.3                                  | 851.4                                  | 5.00        |             |
| ATIC         | 236.2                                 | 53.3                                   | 0.23        |             | ARL6IP5   | 207.2                                  | 681.5                                  | 3.29        |             | APPL1    | 135.7                                 | 104.3                                  | 0.77        |             | ANP32E   | 147.9                                  | 88.8                                   | 0.60        |             |
| ATG9A        | 150.3                                 | 558                                    | 3.71        |             | ARL6IP1   | 97.6                                   | 216.6                                  | 2.22        |             | APP      | 509.8                                 | 1160.1                                 | 2.28        |             | ANP32B   | 191.8                                  | 29.2                                   | 0.15        |             |
| ATG7         | 125.6                                 | 57.2                                   | 0.46        |             | ARL6      | 120.6                                  | 51                                     | 0.42        |             | APOOL    | 99.9                                  | 282.5                                  | 2.83        |             | ANP32A   | 289.1                                  | 42.7                                   | 0.15        |             |
| ATG3         | 115.3                                 | 36.5                                   | 0.32        |             | ARL3      | 124.8                                  | 32.5                                   | 0.26        |             | APOO     | 58.4                                  | 172.2                                  | 2.95        |             | ANO6     | 67.5                                   | 419.6                                  | 6.22        |             |
| ATG16L1      | 283.7                                 | 152.3                                  | 0.54        |             | ARL2      | 92.9                                   | 56.6                                   | 0.61        |             | APOM     | 44                                    | 106.6                                  | 2.42        |             | ANO10    | 157.1                                  | 588.5                                  | 3.75        |             |
| ATG12        | 213.4                                 | 129                                    | 0.60        |             | ARL15     | 43.3                                   | 159.3                                  | 3.68        |             | APOL2    | 166.8                                 | 463.7                                  | 2.78        |             | ANKS4B   | 46.6                                   | 34.5                                   | 0.74        |             |
| ATE1         | 184.4                                 | 53.2                                   | 0.29        |             | ARL1      | 124.7                                  | 187.6                                  | 1.50        |             | APOH     | 1                                     | 3.4                                    | 3.40        |             | ANKS1A   | 83.3                                   | 47.5                                   | 0.57        |             |
| ATAD3A       | 251.7                                 | 728.8                                  | 2.90        |             | ARIH1     | 187.3                                  | 90.4                                   | 0.48        |             | APOE     | 34.1                                  | 74.4                                   | 2.18        |             | ANKRD46  | 86.1                                   | 333.4                                  | 3.87        |             |
| ATAD1        | 113.3                                 | 385.3                                  | 3.40        |             | ARID1B    | 100.4                                  | 35.2                                   | 0.35        |             | APOD     | 4.2                                   | 7.3                                    | 1.74        |             | ANKRD28  | 114.8                                  | 102                                    | 0.89        |             |
| ASS1         | 8.6                                   | 6.2                                    | 0.72        |             | ARID1A    | 198.1                                  | 125.7                                  | 0.63        |             | APOBEC3C | 280.7                                 | 41.6                                   | 0.15        |             | ANKRD17  | 106.8                                  | 47.5                                   | 0.44        |             |
| ASRGL1       | 478.3                                 | 90.6                                   | 0.19        |             | ARHGEF7   | 129.9                                  | 85.5                                   | 0.66        |             | APOB     | 15.9                                  | 20.9                                   | 1.31        |             | ANKRD13A | 115.9                                  | 195.1                                  | 1.68        |             |
| ASPSCR1      | 131.9                                 | 27.2                                   | 0.21        |             | ARHGEF37  | 62.9                                   | 95.6                                   | 1.52        |             | APOA4    | 23.4                                  | 82.4                                   | 3.52        |             | ANKMY2   | 136                                    | 111.3                                  | 0.82        |             |
| ASPN         | 1.1                                   | 0.5                                    | 0.45        |             | ARHGEF28  | 177.5                                  | 171.1                                  | 0.96        |             | APOA1    | 23.7                                  | 19.1                                   | 0.81        |             | ANKLE2   | 115.9                                  | 167.2                                  | 1.44        |             |
| ASPH         | 74.9                                  | 185.2                                  | 2.47        |             | ARHGEF2   | 110.1                                  | 117.4                                  | 1.07        |             | APMAP    | 132.5                                 | 462.1                                  | 3.49        |             | ANKHD1   | 157.9                                  | 58.5                                   | 0.37        |             |
| ASPDH        | 5.6                                   | 4.2                                    | 0.75        |             | ARHGEF16  | 102.3                                  | 80.7                                   | 0.79        |             | APLP2    | 399                                   | 1504.2                                 | 3.77        |             | ANKFY1   | 70.2                                   | 98                                     | 1.40        |             |
| ASPA         | 12.6                                  | 0.1                                    | 0.01        |             | ARHGEF12  | 84.3                                   | 94                                     | 1.12        |             | APIP     | 346.3                                 | 49.2                                   | 0.14        |             | ANK3     | 57.8                                   | 46.3                                   | 0.80        |             |
| ASNS         | 8596.2                                | 3266.3                                 | 0.38        |             | ARHGEF10L | 71.2                                   | 102.6                                  | 1.44        |             | API5     | 166.1                                 | 83.9                                   | 0.51        |             | ANK2     | 38.7                                   | 74.6                                   | 1.93        |             |
| ASNA1        | 156.3                                 | 91.8                                   | 0.59        |             | ARHGEF10  | 112.8                                  | 65.8                                   | 0.58        |             | APEX1    | 222.4                                 | 17.4                                   | 0.08        |             | ANK1     | 47.7                                   | 41.3                                   | 0.87        |             |
| ASMTL        | 84.8                                  | 16                                     | 0.19        |             | ARHGEF1   | 137                                    | 94.5                                   | 0.69        |             | APEH     | 228.8                                 | 79.7                                   | 0.35        |             | ANAPC7   | 136.7                                  | 88.7                                   | 0.65        |             |
| ASL          | 184.8                                 | 36.9                                   | 0.20        |             | ARHGDI8   | 3.9                                    | 4.8                                    | 1.23        |             | APCS     | 1.3                                   | 2.1                                    | 1.62        |             | ANAPCS   | 130.4                                  | 60.4                                   | 0.46        |             |
| ASH2L        | 114.2                                 | 16.3                                   | 0.14        |             | ARHGDI4   | 181.5                                  | 38.9                                   | 0.21        |             | APC      | 156.1                                 | 124.9                                  | 0.80        |             | ANAPC1   | 129.7                                  | 41.1                                   | 0.32        |             |
| ASCC3        | 261.1                                 | 195.1                                  | 0.75        |             | ARHGAP8   | 85.3                                   | 82.1                                   | 0.96        |             | AP3S1    | 219.8                                 | 132.4                                  | 0.60        |             | AMPD2    | 206.4                                  | 53                                     | 0.26        |             |
| ASCC2        | 296.5                                 | 159                                    | 0.54        |             | ARHGAP35  | 96.1                                   | 53.6                                   | 0.56        |             | AP3M1    | 155.3                                 | 97.4                                   | 0.63        |             | AMN      | 32.7                                   | 165.3                                  | 5.06        |             |
| ASAP2        | 68.4                                  | 66.7                                   | 0.98        |             | ARHGAP29  | 167.5                                  | 172.2                                  | 1.03        |             | AP3D1    | 178.8                                 | 134.1                                  | 0.75        |             | AMBP     | 1.4                                    | 0.1                                    | 0.07        |             |
| ASAH1        | 90.7                                  | 114.5                                  | 1.26        |             | ARHGAP27  | 175.5                                  | 178                                    | 1.01        |             | AP3B1    | 136                                   | 99.6                                   | 0.73        |             | AMACR    | 144.1                                  | 16.3                                   | 0.11        |             |

Values are expressed as % of protein abundance in TL of human kidney cortex 1.

## Supplemental table 5 (Continued):

| Protein name | 3D RPTEC Spheroid_Lot.664995_day12_TL | 3D RPTEC Spheroid_Lot.664995_day12_PM | PM/TL ratio | Protein name | 3D RPTEC Spheroid_Lot.664995_day12_TL | 3D RPTEC Spheroid_Lot.664995_day12_PM | PM/TL ratio | Protein name | 3D RPTEC Spheroid_Lot.664995_day12_TL | 3D RPTEC Spheroid_Lot.664995_day12_PM | PM/TL ratio | Protein name | 3D RPTEC Spheroid_Lot.664995_day12_TL | 3D RPTEC Spheroid_Lot.664995_day12_PM | PM/TL ratio |
|--------------|---------------------------------------|---------------------------------------|-------------|--------------|---------------------------------------|---------------------------------------|-------------|--------------|---------------------------------------|---------------------------------------|-------------|--------------|---------------------------------------|---------------------------------------|-------------|
| ALYREF       | 449.7                                 | 56.2                                  | 0.12        | AIP          | 136.8                                 | 51.8                                  | 0.38        | ADD1         | 59.1                                  | 32.4                                  | 0.55        | ACE2         | 93.7                                  | 448.8                                 | 4.79        |
| ALS2         | 80.2                                  | 77.4                                  | 0.97        | AIMP2        | 220.6                                 | 111.6                                 | 0.51        | ADCY9        | 119.6                                 | 332.6                                 | 2.78        | ACE          | 25.2                                  | 75.5                                  | 3.00        |
| ALPL         | 90.8                                  | 414                                   | 4.56        | AIMP1        | 253                                   | 70.5                                  | 0.28        | ADCY6        | 95.6                                  | 629.3                                 | 6.58        | ACBD5        | 129                                   | 171.5                                 | 1.33        |
| ALG9         | 93.9                                  | 285.8                                 | 3.04        | AIFM1        | 78.4                                  | 241.3                                 | 3.08        | ADCK1        | 83                                    | 243.2                                 | 2.93        | ACBD3        | 126.3                                 | 64.1                                  | 0.51        |
| ALG6         | 163.8                                 | 767.3                                 | 4.68        | AIF1L        | 13                                    | 9.4                                   | 0.72        | ADAR         | 197.2                                 | 92                                    | 0.47        | ACAT2        | 1470.6                                | 300.7                                 | 0.20        |
| ALG5         | 38.8                                  | 152.8                                 | 3.94        | AIDA         | 110.6                                 | 170.7                                 | 1.54        | ADAMTS1      | 164.9                                 | 202.5                                 | 1.23        | ACAT1        | 73.5                                  | 4.9                                   | 0.07        |
| ALG10        | 57.5                                  | 253.8                                 | 4.41        | AHSG         | 4.7                                   | 1.7                                   | 0.36        | ADAM9        | 188.4                                 | 1106.6                                | 5.87        | ACAP2        | 142.4                                 | 102.2                                 | 0.72        |
| ALG1         | 130.6                                 | 427.1                                 | 3.27        | AHSA1        | 146.3                                 | 97.4                                  | 0.67        | ADAM17       | 153.1                                 | 987.3                                 | 6.45        | ACADVL       | 56.5                                  | 6.3                                   | 0.11        |
| ALDOC        | 205                                   | 39.2                                  | 0.19        | AHNAK        | 331.5                                 | 116.9                                 | 0.35        | ADAM10       | 99.8                                  | 692.8                                 | 6.94        | ACADSVL      | 32.8                                  | 5.3                                   | 0.16        |
| ALDOB        | 3.3                                   | 1.8                                   | 0.55        | AHCYL1       | 173.8                                 | 565.9                                 | 3.26        | ACY3         | 22.3                                  | 4.9                                   | 0.22        | ACADS        | 86                                    | 4.9                                   | 0.06        |
| ALDOA        | 239                                   | 52.5                                  | 0.22        | AHCY         | 92.3                                  | 21.3                                  | 0.23        | ACY1         | 67.6                                  | 15.9                                  | 0.24        | ACADM        | 45.7                                  | 2.3                                   | 0.05        |
| ALDH9A1      | 79.6                                  | 19.3                                  | 0.24        | AGXT2        | 43.1                                  | 22.5                                  | 0.52        | ACTR3        | 144.8                                 | 44.4                                  | 0.31        | ACADL        | 38.7                                  | 0.1                                   | 0.00        |
| ALDH8A1      | 56.9                                  | 17.2                                  | 0.30        | AGXT         | 3.9                                   | 6                                     | 1.54        | ACTR2        | 147.9                                 | 48.8                                  | 0.33        | ACAD9        | 119.2                                 | 283.1                                 | 2.38        |
| ALDH7A1      | 59.7                                  | 8.3                                   | 0.14        | AGTRAP       | 98.1                                  | 673.7                                 | 6.87        | ACTR1B       | 127.8                                 | 52.2                                  | 0.41        | ACAD8        | 38.4                                  | 5.8                                   | 0.15        |
| ALDH6A1      | 29.2                                  | 3                                     | 0.10        | AGTRAP       | 170.6                                 | 943.2                                 | 5.53        | ACTRIA       | 183.8                                 | 71                                    | 0.39        | ACAD11       | 48.3                                  | 10.2                                  | 0.21        |
| ALDH5A1      | 28.5                                  | 1.5                                   | 0.05        | AGT          | 16.4                                  | 14.1                                  | 0.86        | ACTR10       | 122.6                                 | 50                                    | 0.41        | ACAD10       | 46.9                                  | 11.5                                  | 0.25        |
| ALDH4A1      | 36.2                                  | 6.6                                   | 0.18        | AGRN         | 41.4                                  | 14.7                                  | 0.36        | ACTN4        | 44.6                                  | 34                                    | 0.76        | ACAA         | 469.7                                 | 380.1                                 | 0.81        |
| ALDH3B1      | 179.9                                 | 1332.5                                | 7.41        | AGPS         | 226                                   | 252.1                                 | 1.12        | ACTN1        | 73.4                                  | 43.6                                  | 0.59        | ACAA2        | 22.4                                  | 2.2                                   | 0.10        |
| ALDH3A2      | 30.6                                  | 86.7                                  | 2.83        | AGPAT5       | 44.1                                  | 292.8                                 | 6.64        | ACTL6A       | 112.5                                 | 123.8                                 | 1.10        | ACAA1        | 56.3                                  | 7.7                                   | 0.14        |
| ALDH2        | 65.3                                  | 5.1                                   | 0.08        | AGPAT3       | 48.9                                  | 143.4                                 | 2.93        | ACTA2        | 19.3                                  | 16.5                                  | 0.85        | ABRAXAS2     | 163.2                                 | 56.4                                  | 0.35        |
| ALDH1L1      | 49.3                                  | 13.6                                  | 0.28        | AGPAT2       | 57.8                                  | 146.1                                 | 2.53        | ACS3         | 87.6                                  | 9.9                                   | 0.11        | ABLM3        | 212.3                                 | 258.9                                 | 1.22        |
| ALDH1B1      | 44.6                                  | 3.1                                   | 0.07        | AGPAT1       | 87                                    | 213.8                                 | 2.46        | ACSS2        | 615.3                                 | 104.7                                 | 0.17        | ABLM1        | 74.9                                  | 110.7                                 | 1.48        |
| ALDH1A3      | 1234.3                                | 343.2                                 | 0.28        | AGO2         | 95.8                                  | 16.9                                  | 0.18        | ACSS1        | 61.2                                  | 9                                     | 0.15        | ABI2         | 139.7                                 | 215.5                                 | 1.54        |
| ALDH1A2      | 70                                    | 25                                    | 0.36        | AGMAT        | 18.5                                  | 4.2                                   | 0.23        | ACSM3        | 137.5                                 | 18.5                                  | 0.13        | ABI1         | 167.6                                 | 244.4                                 | 1.46        |
| ALDH1A1      | 190.4                                 | 38.8                                  | 0.20        | AGL          | 171.9                                 | 52.7                                  | 0.31        | ACSM2B       | 15.7                                  | 1.5                                   | 0.10        | ABHD6        | 31.7                                  | 132.7                                 | 3.52        |
| ALDH18A1     | 206.5                                 | 29                                    | 0.14        | AGK          | 98                                    | 219.7                                 | 2.24        | ACSM2A       | 15.2                                  | 0.8                                   | 0.05        | ABHD16A      | 91.7                                  | 309.4                                 | 3.37        |
| ALDH16A1     | 100.7                                 | 61.2                                  | 0.61        | AGFG1        | 171.4                                 | 41.5                                  | 0.24        | ACSL4        | 290.3                                 | 430.5                                 | 1.48        | ABHD14B      | 135.1                                 | 36.3                                  | 0.27        |
| ALCAM        | 136.7                                 | 603.6                                 | 4.42        | AFTPH        | 94.1                                  | 63.5                                  | 0.67        | ACSL3        | 144.7                                 | 542.6                                 | 3.75        | ABHD12       | 227.9                                 | 800.8                                 | 3.51        |
| ALAD         | 18.3                                  | 8.2                                   | 0.45        | AFMID        | 78.4                                  | 22                                    | 0.28        | ACSL1        | 100.7                                 | 183.1                                 | 1.82        | ABHD11       | 164.5                                 | 9.7                                   | 0.06        |
| AKTIP        | 127                                   | 85.8                                  | 0.68        | AFM          | 5.9                                   | 3.5                                   | 0.59        | ACSF3        | 64.3                                  | 4.7                                   | 0.07        | ABHD10       | 44.9                                  | 8.3                                   | 0.18        |
| AKT1S1       | 212.4                                 | 194.2                                 | 0.91        | AFG3L2       | 97.3                                  | 345.4                                 | 3.55        | ACSF2        | 21.6                                  | 2.1                                   | 0.10        | ABCF3        | 145.9                                 | 56.9                                  | 0.39        |
| AKR7A3       | 16.3                                  | 8.9                                   | 0.55        | AFDN         | 77.8                                  | 121                                   | 1.56        | ACP6         | 209.8                                 | 60.8                                  | 0.29        | ABCF2        | 183.1                                 | 138.6                                 | 0.76        |
| AKR7A2       | 49.5                                  | 10.5                                  | 0.21        | AFDN         | 138.1                                 | 123.2                                 | 0.89        | ACP3         | 172.1                                 | 288.2                                 | 1.67        | ABCF1        | 139.2                                 | 140.8                                 | 1.01        |
| AKR1C3       | 117.6                                 | 27.1                                  | 0.23        | AEBP1        | 7.3                                   | 11.2                                  | 1.53        | ACP2         | 151.7                                 | 944.4                                 | 6.23        | ABCE1        | 194.3                                 | 64.9                                  | 0.33        |
| AKR1C2       | 385.4                                 | 151.5                                 | 0.39        | ADSS2        | 211                                   | 52.2                                  | 0.25        | ACP1         | 157.3                                 | 63.9                                  | 0.41        | ABCD4        | 74.3                                  | 445                                   | 5.99        |
| AKR1C1       | 51.6                                  | 10                                    | 0.19        | ADSS1        | 31.3                                  | 2.8                                   | 0.09        | ACOX1        | 161                                   | 36.4                                  | 0.23        | ABCD3        | 55.9                                  | 91.7                                  | 1.64        |
| AKR1B10      | 34                                    | 9.4                                   | 0.28        | ADSL         | 243                                   | 45.6                                  | 0.19        | ACOX3        | 147.4                                 | 30.1                                  | 0.20        | ABCD1        | 210.6                                 | 407.7                                 | 1.94        |
| AKR1B1       | 2470                                  | 509.2                                 | 0.21        | ADRM1        | 513.8                                 | 109                                   | 0.21        | ACOX2        | 12.8                                  | 2.1                                   | 0.16        | ABCC6        | 56.9                                  | 304.7                                 | 5.36        |
| AKR1A1       | 87.6                                  | 17.7                                  | 0.20        | ADPRHL2      | 169.3                                 | 24.5                                  | 0.14        | ACOX1        | 63.2                                  | 16.2                                  | 0.26        | ABCC4        | 195.1                                 | 1628.1                                | 8.34        |
| AKAP9        | 109.1                                 | 50.5                                  | 0.46        | ADPGK        | 88.1                                  | 331                                   | 3.76        | ACOT9        | 90.1                                  | 7                                     | 0.08        | ABCC3        | 164.7                                 | 1117.5                                | 6.79        |
| AKAP8L       | 160.8                                 | 41.2                                  | 0.26        | ADNP         | 154.3                                 | 1069.5                                | 6.93        | ACOT8        | 260.3                                 | 67.1                                  | 0.26        | ABCC2        | 49.6                                  | 280.5                                 | 5.66        |
| AKAP2        | 112.3                                 | 79                                    | 0.70        | ADK          | 323.3                                 | 48.5                                  | 0.15        | ACOT7        | 284.5                                 | 103.9                                 | 0.37        | ABCC10       | 202.1                                 | 1143.1                                | 5.66        |
| AKAP13       | 157                                   | 160.1                                 | 1.02        | ADI1         | 337.1                                 | 60.8                                  | 0.18        | ACOT2        | 75.8                                  | 8.6                                   | 0.11        | ABCC1        | 218.2                                 | 1212.9                                | 5.56        |
| AKAP12       | 100.5                                 | 67.4                                  | 0.67        | ADHFE1       | 66.4                                  | 4.7                                   | 0.07        | ACOT13       | 47.2                                  | 6.7                                   | 0.14        | ABCB8        | 90.7                                  | 326.6                                 | 3.60        |
| AK6          | 124.3                                 | 70.6                                  | 0.57        | ADH6         | 7.4                                   | 4.4                                   | 0.59        | ACOT11       | 33.9                                  | 30.6                                  | 0.90        | ABCB7        | 63.4                                  | 244                                   | 3.85        |
| AK5          | 3880.1                                | 2489.7                                | 0.64        | ADH5         | 139.3                                 | 36                                    | 0.26        | ACO2         | 82.8                                  | 5.6                                   | 0.07        | ABCB6        | 108.1                                 | 1040.3                                | 9.62        |
| AK4          | 61.3                                  | 14.1                                  | 0.23        | ADH1C        | 21.2                                  | 29.5                                  | 1.39        | ACO1         | 70.6                                  | 16.6                                  | 0.24        | ABCB10       | 129.2                                 | 494.9                                 | 3.83        |
| AK3          | 136.9                                 | 15.4                                  | 0.11        | ADH1B        | 3.7                                   | 3.2                                   | 0.86        | ACMSD        | 52.2                                  | 14.9                                  | 0.29        | ABCB1        | 62.6                                  | 443.7                                 | 7.09        |
| AK2          | 96.4                                  | 193.6                                 | 2.01        | ADGRL2       | 22.3                                  | 77.1                                  | 3.46        | ACLY         | 353.5                                 | 82.5                                  | 0.23        | ABCA8        | 0.1                                   | 4.1                                   | 41.00       |
| AK1          | 378.3                                 | 93.3                                  | 0.25        | ADD3         | 52.7                                  | 24.3                                  | 0.46        | ACIN1        | 348.4                                 | 33.1                                  | 0.10        | ABCA3        | 174.6                                 | 1117.1                                | 6.40        |

Values are expressed as % of protein abundance in TL of human kidney cortex 1.

**Supplemental table 5 (Continued):**

| Protein name | 3D RPTEC Spheroid_Lot.664995_day12_TL | 3D RPTEC Spheroid_Lot.664995_day12_PM | PM/TL ratio |
|--------------|---------------------------------------|---------------------------------------|-------------|
| ABCA2        | 78.1                                  | 330.5                                 | 4.23        |
| ABAT         | 11.9                                  | 2.4                                   | 0.20        |
| AASS         | 137.2                                 | 15.8                                  | 0.12        |
| AASDHPPT     | 257.2                                 | 95.2                                  | 0.37        |
| AARSD1       | 142.9                                 | 30.5                                  | 0.21        |
| AARS2        | 116.5                                 | 19.1                                  | 0.16        |
| AARS1        | 198.1                                 | 43.4                                  | 0.22        |
| AAR2         | 134.3                                 | 110.7                                 | 0.82        |
| AAMP         | 180.9                                 | 52.2                                  | 0.29        |
| AAK1         | 105.8                                 | 68.7                                  | 0.65        |
| AAGAB        | 127.3                                 | 109                                   | 0.86        |
| AACS         | 552.2                                 | 214.1                                 | 0.39        |
| AAAS         | 92.7                                  | 161.3                                 | 1.74        |
| A2M          | 9.9                                   | 9.6                                   | 0.97        |
| A1CF         | 26.6                                  | 13.1                                  | 0.49        |
| A1BG         | 5.2                                   | 0.8                                   | 0.15        |

Values are expressed as % of protein abundance in TL of human kidney cortex 1.

**Reference**

Agarwal S, Sudhini YR, Polat OK, Reiser J, and Altintas MM (2021) Renal cell markers:

lighthouses for managing renal diseases. *Am J Physiol-renal* **321**:F715–F739.
